# Supplementary material
Source: HighWire-hosted journal article supplement (https://bjsm.bmj.com/content/52/21/1357)
Supplement: inline-supplementary-material-1 [file inline-supplementary-material-1.docx]

**Online Supplement**

**1) Additional information about methods**

*Evidence Synthesis: Statistical analysis and narrative synthesis*

For the acute exercise data, change scores were calculated using the generic inverse variance method (Cochrane Collaboration, Copenhagen) (1). Glycemic response during exercise was defined as the mean difference between baseline and during exercise blood glucose (BG) values. Post-exercise glycemic response was defined as the mean difference between baseline and post-exercise (within 15 min) blood glucose values. The standard deviation (SD) of the change score was determined assuming a correlation of 0.5, and then converted into standard error (SE). All instances of acute exercise that reported the outcome of interest were combined onto a single forest plot regardless of study type. If data from the same participants were available for multiple time points, the total number of participants was divided by the number of time points to ensure that one study sample was not over-represented in a forest plot.

To assess hypoglycemia in response to acute exercise, the pooled proportion of hypoglycemic events was obtained through random effects pooling of logit-transformed proportions in R (version 3.4.1) using the rma.glmm function for generalized linear mixed effects models in the metaphor package (2). In order to calculate the proportion of hypoglycemic events, the total number of exercise sessions was required. In the event that a study did not report total number of sessions, it was estimated by multiplying the number of sessions (length of the intervention in weeks by the number of sessions per week) by the number of participants.

**2) Additional results**

*Study characteristics*

Glycemic response during an acute bout of prenatal exercise: There were six studies (123 women) including one non-randomized intervention (3), one cohort study (4) and four cross-sectional studies (5-8) that all included acute aerobic exercise. Two studies reported on low intensity exercise (5, 6), two studies reported on moderate intensity exercise (6, 8), and three studies reported vigorous-to-high intensity exercise (3, 4, 7). Five studies reported exercise lasting 20 minutes or less (3-6, 8), three studies reported exercise lasting between 20 and 39 minutes(6-8) and two studies reported exercise lasting 40 minutes of more (3, 8). Two studies included women with diabetes (5, 6).

Glycemic response following an acute bout of prenatal exercise: There were 23 studies (490 women) including three randomized control trials (9-11), four non-randomized interventions (3, 12-14), four cohort studies (4, 15-17) and twelve cross-sectional studies (8, 18-28) that all included acute aerobic exercise. Six studies reported on low intensity exercise (6, 11, 12, 19, 20, 25), thirteen studies reported on moderate intensity exercise (8-10, 14, 15, 17, 18, 20-23, 26, 28) and eleven studies reported vigorous intensity exercise (3, 4, 10, 11, 13, 14, 16, 20, 22-24, 26, 27). Eight studies reported exercise lasting 20 minutes or less (10, 17, 19, 20, 22, 24, 25, 28), ten studies reported exercise lasting between 20 and 39 minutes (11, 12, 14-16, 18, 21, 23, 26, 28) and eight studies reported exercise lasting 40 minutes or more (3, 4, 8, 9, 11-13, 27). Four studies included women with GDM (9, 10, 12, 18), five studies focused on women who were previously active (3, 13, 15, 16, 24), one focused on women who were previously inactive (6), and one focused on women with overweight/obesity prior to pregnancy (12).

Proportion of hypoglycemia: There were eight studies (194 exercisers) including four randomized control trials (9, 10, 29, 30), two non-randomized interventions (12, 13) and two cross-sectional studies (22, 27). One study included resistance training (30), while the rest included aerobic exercise (9, 10, 12, 13, 22, 27, 29). Five studies included women with GDM (9, 10, 12, 29, 30), one study focused on women with overweight/obesity prior to pregnancy (12), one study focused on women who were previously active (13), and two focused on women who were previously inactive (22, 30).

Glycemic response to chronic prenatal exercise

*Randomized Controlled Trials*

There was 23 randomized control trials (5,729 women) including ten exercise-only intervention (31-40), eleven exercise + co-interventions (9, 10, 41-49), and two that included two intervention arms (exercise-only group, and an exercise + co-intervention group) (50, 51). The interventions included aerobic exercise (9, 10, 32, 33, 35-37, 39, 40, 42-48), aerobic exercise and resistance training (34, 38, 51), yoga (41, 49), or various type of exercise (31, 50). Of the 12 exercise-only interventions, two included women with diabetes (33, 36), nine included women with overweight/obesity prior to pregnancy (36-40, 50, 51), one included women who were previously active (32), and three included women who were previously inactive (34, 39, 43).

Use of insulin for the management of GDM

*Randomized Controlled Trials*

There were eleven randomized control trials (n=2,105) including two exercise-only interventions (30, 52), and eight exercise + a co-interventions (9, 10, 42, 45, 46, 53-55). The interventions included aerobic exercise (9, 10, 42, 46, 52, 53), resistance training (30, 54), exercise classes (55), and various types of exercise (45). Six studies included women with GDM (9, 10, 30, 42, 52-54), one study included women withoverweight/obesity prior to pregnancy (46), and one included women who were previously inactive (30). Five studies involved exercise supervision by a member of the study team at least once every two weeks (9, 30, 46, 52, 55). Four studies involved unsupervised or counseling about healthy lifestyle during pregnancy, which included advice and recommendations to be physically active during pregnancy (42, 45, 54).

*Non-Randomized Interventions*

Two non-randomized interventions (n=126 women) included a supervised aerobic exercise intervention (12, 56). Both studies focused on GDM women with overweight/obesity prior to pregnancy.

Amount of insulin required for the Management of GDM

*Randomized Controlled Trials*

There were three randomized control trials (n=45) that included an exercise only (30) and an exercise + co-intervention (54){Halse, 2014 #1699 These three studies focused on women with GDM (9, 30, 54).

*Non-Randomized Interventions*

One non-randomized intervention (21 women) included a supervised aerobic exercise intervention for GDM women with overweight/obesity prior to pregnancy (12).

*Synthesis of Data:*

Glycemic Response to Chronic Prenatal Exercise

*A priori* subgroup analyses on the 11 exercise-only interventions did not reduce heterogeneity; however, it did reveal subgroup differences. Our data indicated that exercise-only interventions reduced fasting blood glucose values in women with diabetes (type 2 diabetes and GDM) (“low” quality evidence, rated down due to serious risk of bias and inconsistency; Online Supplement Figure 10), in women who were previously active (“low” quality evidence, rated down due to serious risk of bias and inconsistency; Online Supplement Figure 11), or in women with overweight and obesity (“low” quality evidence, rated down due to serious risk of bias and inconsistency; Online Supplement Figure 12). No effect of exercise-only intervention on fasting blood glucose was observed in women without diabetes, in women of various BMI prior to pregnancy or in women who were previously inactive (Online Supplement Figures 10-11).

Since none of the *a priori* subgroups reduced heterogeneity below 50%, further analyses were performed looking at the effect of supervised vs unsupervised exercise-only interventions. Although this analysis did not reduce the observed heterogeneity, it did reveal that supervised exercise-only interventions resulted in larger decreases in fasting glucose values post-intervention compared to unsupervised exercise-only interventions (“low” quality evidence, rated down due to serious risk of bias and inconsistency; Online Supplement Figure 13).

| Table 1: Subject characteristics. | | | | | | | | | |
| --- | --- | --- | --- | --- | --- | --- | --- | --- | --- |
| Author, year, study type | **Sample Size (n)** | **Age (years), weeks’ gestation at start of intervention** | **Subgroup** | **PA Assessment** |  |  | **Compliance** | **Acute Exercise** | **Results** |
|  |  |  |  | **Objective or Self-Reported** | **FITT** | **Duration of intervention** |  |  |  |
| E-Mekawy, 2012, RCT(36) | E: 20  C:20 | 25-32 years, 24 wks’ gestation | T2D (all receiving insulin therapy) | Objective (Supervised) | 3 days/wk, moderate (60% predicted HRmax), 30 min, cycling | 30 sessions | Could not contact authors |  | Data in forest plot |
| de Barros, 2010, RCT (30) | E: 32 C: 32 | E: 31.81 ± 4.87 C: 32.40 ± 5.4 (after GDM diagnosis) | Sedentary GDM, 24-34 weeks’ gestation | Objective (supervisedmut) | 3 days/wk, vigorous (BORG: 5-6), 30-40 min, resistance training |  | Could not contact authors |  | Data in forest plot |
| Luoto, 2011, RCT(45) | E: 246  C: 196 | E: 29.5 ± 4.8  C: 30.0 ± 4.7, 8-12 wks’ gestation |  | Self-report/objective (PA counselling & pedometer) | Most days, moderate, >800 MET/min a week, LTPA | Follow-up 37 wks’ gestation | Meeting ACSM PA guidelines: at 8-12 wks, at 26-28 wks, at 36-37 wks  E: 47%, 36%, 24%  C: 58%, 30%, 23% |  | Data in forest plot |
| Ruchat, 2012, RCT (11) | LI: 23 HI: 26  C: 45  (historical) | LI: 31.0 ± 3.8 HI: 30.4 ± 4.5 C: 31.8 ± 4.2, 16-20 wks’ gestation |  | Self-report & Objective (1 day/wk supervised) | 3-4 days/wk, low (30% HRR) high (70%HRR), walking | 16 ± 2 wks | 70-79% | 16-20 & 34-36 wks’ gestation  Low/high respectively, 16-20 wks’: 25 min  34-36 wks’: 40 min, walking | Data in forest plot |
| Stafne, 2012, RCT(47) | E: 429  C: 426 | E: 30.5 ± 4.4  C: 30.4 ± 4.3, 18-22 wks’ gestation |  | Self-report/objective (supervised) | 1/wk, moderate-to vigorous (BORG: 13-14), 60 min, aerobic and resistance activities | 12 wks | At follow-up  E: 55% of women followed recommended exercise protocol; 95% reported weekly PFMT  C: 10% exercised 3 days or more/wk at moderate-to vigorous intensities; 79% reported weekly PFMT |  | Data in forest plot |
| Bo, 2014, RCT (42) | E: 101  C: 99 | 18-50 years, 18-24 wks’ gestation | GDM | Self-report (Minnesota-Leisure-Time-Physical-Activity questionnaire) | 7 days/wk, moderate-to-vigorous (BORG: 12-14), 20 min, brisk walking | Follow-up 24-26 wks’ gestation | 68.60% |  | Data in forest plot |
| Cordero, 2015, RCT(32) | E: 101 C: 156 | E: 33.6 ± 4.1  C: 32.9 ± 4.5, 10-12 wks’ gestation | Pre-preg PA:  E: 82.2% active;  C: 72.4% active | Objective (supervised) | 3 days/wk, moderate-to-vigorous (BORG: 12-14; <60% HRmax), 50-60 min, various | End of third trimester | A minimum of 80% adherence to the exercise classes was required for women assigned to the Exercise group |  | Data in forest plot |
| Halse, 2014, RCT(9) | E:20  C:20 | E: 32 ± 3  C: 34 ± 5, 26-30 wks’ gestation | GDM | Objective (supervised) | 5 days/wk, moderate-to-vigorous (BORG: 12-14; 55-85% HRmax), 30-55 min, cycling/ walking | 6 ± 1 wks | 96% | 28+ wks’ gestation  Moderate-to-vigorous (55-85% HRmax), 40-55 min, cycling | Data in forest plot |
| Jovanovic-Peterson, 1989, RCT(10) | E: 10  C: 9 | E: 29.5 ± 2.5  C: 31.1 ± 2.8 | GDM (insulin therapy was not required) | Objective (supervised) | 3 days/wk, moderate-to-vigorous (70% HRmax), 20 min, aerobic exercise | 6 wks | Not reported |  | Data in forest plot |
| Koivusalo, 2016, RCT (44) | E: 155  C: 138 | E: 32.3 ± 4.9 C: 32.6 ± 4.5, first visit 13.3 (IQR:12.0-14.6) wks’ gestation | OB | Self-report (Diary and pedometer) | 3-5 days/wk, moderate-to-vigorous (BPRG: 11-15), 30-50 min, walking/ swimming | 35.1 (IQR: 34.4-35.6) wks’ gestation | Meeting the physical activity guidelines (150 min/week in the second trimester):  E: 26%  C:23%  (No significant differences between the groups) |  | Narrative summary  FBG - baseline to third trimester change scores (95% CI):  E: -0.18 (-0.24, -0.12) mmol/L  C: -0.07 (-0.13, -0.02)  *p*=0.026 |
| Oostdam, 2012, RCT(38) | E: 62 C: 59 | E: 30.8 ± 5.2  C: 30.1 ± 4.5, 15 wks’ gestation | OW/OB | Objective (supervised) | 2 days/wk, variable depending on individual, 60 min, aerobic and strength exercises | 10 wks (until end of intervention) | 16.3%: Attendance in 50% of exercise classes |  | Data in forest plot |
| Poston, 2015, RCT(46) | E: 783  C: 772 | E: 30.5 ± 5.5  C: 30.4 ± 5.6, 15-16 + 6 days gestation | OB | Objective (1 session/wk health sessions)/self-reported | 7 days/wk, not reported, 420 min/wk walking/ 30 min/wk moderate-to-vigorous PA, LTPA | 8 wks | 15-18 weeks ± 6 days  (MET min/week):  E: 1386 (594-2982)  C: 1386 (660-3052)  27-28 ± 6 days:  E 1836 (792-4158)  C:1386 (639-3363) |  | Data in forest plot |
| Daniel, 2014, RCT(33) | E: 17  C: 17 | E: 32.0 ± 3.42  C: 32.93 ± 4.61, at least 24 wks’ gestation | GDM | Objective (supervised) | 3 days/wk, low-to-moderate (BORG: 9-14), 40 min (first 4 wks), 80 min (last 4 wks), aerobic dance | 8 wks | Set a minimum of 16 sessions attendance as criteria for inclusion into the analysis - 12 attended all the 24 session (100%), 1 attended 23 sessions (96%), and 2 attended 20 sessions (83%); Data from author |  | Data in forest plot |
| Avery, 1997, RCT(52) | E: 16 C: 176 | E: 32.2 ± 4.9 C: 30.4 ± 5.1, < 34 wks’ gestation (after GDM diagnosis) | GDM | Objective (supervised) | 3-4 wks’ gestation, moderate-to-vigorous (70% HRmax), 30 min, cycling/ walking |  | Not reported |  | Data in forest plot |
| Youngwanich-  setha, 2014, RCT(49) | E: 85  C: 85 | E: 32.58 ± 5.01  C: 31.24 ± 4.54, 24-34 wks’ gestation | GDM | Self-report (phone interview) | 5 days/wks, not reported, 15-20 min, yoga | 8 wks | Not reported |  | Data in forest plot |
| Vinter, 2014, RCT(48) | E: 150  C: 154 | E: 29 (27-32)  C: 29 (26-31), 10-14 wks’ gestation | OB | Objective (self-report & supervised) | 1 day/wk, moderate, 30-60 min, aerobic classes | Throughout pregnancy | 56% - self reported |  | Data in forest plot |
| Ko, 2014, RCT (37) | E: 591 C: 605 | E: 26.0 ± 4.8  C: 26.0 ± 4.7, late first trimester | Pre-preg  PA  METhr/wk:  E:  31.1(35.1)  C:  30.9 (28.7) | Objective (supervised) & Self-report | 3-5 days/wk, moderate-to-vigorous, 30-60 min, various aerobics | 36 weeks’ gestation | Not reported |  | Data in forest plot |
| Ferrara, RCT, 2011(53) | E: 96 C: 101 | >18, after GDM diagnosis | GDM | Self-reported | 150 min/wk of moderate-to-vigorous PA |  | Emailed author no reply |  | Data in forest plot |
| Hawkins, 2015, RCT(43) | E: 35  C: 35 | 18-40, 20.3 wk’ gestation (randomization) | OW/OB | Objective (diary/ pedometer/ counselling) | Most days of the week, moderate, 30+ min, various | 6 months | Patient retention to delivery:  E: 97%  C: 97%  E: 4 ± 1.45 sessions out of 6 sessions |  | Narrative Summary  Change scores from baseline to mid pregnancy (24-26 wks’ gestation) – Mean (SD)  E: 4.8 (8.8)  C: 0.2 (0.5)  *p*=0.63 |
| Callaway, 2012, RCT (31) | E: 25 C: 25 | E: 30.4 ± 4.8 C: 30.0 ± 5.9, 12 weeks’ gestation | OB | Self-report (exercise counselling) | Not reported, E: 9.6 METhr/wk  C: 2.8 METhr/wk, not reported, various | 12 wks | At 28 weeks’ gestation met targets of > 900kcal/wk:  E: 73%  C: 42% |  | Data in forest plot |
| Abirami, 2014, RCT (41) | E: 104 C: 108 | Not reported,  24-28 weeks’ gestation | GDM | Self-reported (Diary) | 7 days/wk, not reported, 30-40 min, Yoga |  | E: >80%; yoga practice scores |  | Data in forest plot |
| Brankston, 2004, RCT (54) | E: 16  C: 16 | E: 30.5 ± 4.4 C: 31.3 ± 5.0, 26 wks’ gestation | GDM | Self-report | 3 days/wk, moderate-to-vigorous (BORG: 13-14),not reported, resistance training | 36 wks’ gestations | E: 2.0 ± 0.9 sessions/wk |  | Data in forest plot |
| Simmons, 2015, RCT (50) | C: 50 D+E: 50 E: 50 | C: 31.1 ± 6.0  D+E: 30.5 ± 5.0  E: 33.1 ± 5.2, before 20 weeks’ gestation | OB | Objective (accelerometry) | Not reported, moderate-to-vigorous, not reported, various | Follow-up 36 weeks’ gestation |  |  | Data in forest plot |
| Bung, 1991, RCT(29) | E: 17  C: 17 | E: 38.97 ± 1.74  C: 38.18 ± 2.04, 30.4 weeks’ gestation | GDM (all receiving insulin therapy), most previously sedentary | Objective (supervised) | 3 days/wk, moderate (50%VO2max), 45 min, cycling | At least 4 weeks | No reply from authors |  | Data in forest plot |
| Ong, 2009, RCT (39) | E: 6  C:6 | 30 ± 4, 18 weeks’ gestation | Sedentary OB | Objective (supervised) | 3 days/wk, moderate (50-70% HRmax), 35-50 min, cycling | 10 wks | Exercisers completing 94% of all scheduled sessions |  | Data in forest plot |
| Garnaes, 2016, RCT(34) | E: 46  C: 45 | E: 31.3 ± 3.8 C: 31.4 ± 4.7, 12-18 weeks’ gestation | Sedentary BMI 28+ | Self-report & Objective (supervised) | 3 days/wk, moderate-to-vigorous (RPE:12-15), 50 min, various (aerobic and resistance training) | 34-37 wks’ gestation | E: 50% of the women fulfilled the training intervention |  | Narrative Summary  FBG @ 34-37 wks’ gestation Mean (95% CI):  E: 4. 6 (4.4, 4.8)  C: 4.5 (4.3, 4.7)  *p*=0.56 |
| Sagedal, 2017, RCT (55) | E: 303  C: 303 | E: 28.0 ± 4.0 C: 28.5 ± 4., < 20 wks’ gestation |  | Self-report & Objective (supervised) | 2 days/wk, moderate, 60 min, exercise class | 36 wks’ gestation | 115 (56.7%) of the intervention particpants were defined as compliant (14+ classes attended) |  | Data in forest plot |
| Guelfi, 2016, RCT(35) | E: 85  C: 87 | E: 33.6 ± 4.1 C: 33.8 ± 3.9, 13 ± 1 weeks’ gestation |  | Objective (supervised) | 3 days/wk, moderate-to-vigorous, (55-85% HRmax/ BORG: 9-16), 20-60 min, cycling | 14 wks | sessions completed - Median (IQR): 86% 79-95% |  | Data in forest plot |
| Wang, 2016, RCT (40) | E: 132 C: 133 | Not reported, prior to 14 weeks’ gestation |  | Objective (supervised) | 3 days/wk, not reported, not reported, cycling | 16 ± 2 wks | not reported |  | Data in forest plot |
| Simmons, 2016b, RCT (51) | C: 105 D+E: 108 E: 110 | Not reported, prior to 20 weeks’ gestation | OB | Objective | Not reported, 22-44hr MVPA/wk, not reported, aerobic and resistance training | 35-37 wks’ gestation | not reported |  | Data in forest plot |
| Artal, 2007, Non RCT intervention (56) | E: 39 C: 57 | E: 32.4 ± 5.3 C: 30.6 ± 5.5, after GDM diagnosis | OW/OB, GDM | Self-reported (6 days/wk), Objective (supervised 1 day/wk) | 7 days/wk, moderate (<60% VO2 max), 153 (91.4) min/wk, cycling/ walking |  | 50% had compliance >150min/week; All 39 women in the E group reported engaging in exercise, with 30 of the 39 women regularly documenting exercise in their journals. |  | Data in forest plot |
| Giroux, 2006, Non RCT intervention (13) | 11 | 32.5 ± 3.6, 18 wks’ gestation | Pre-preg PA: Active prior to pregnancy | Self-reported | 2-4 days/wk, vigorous (70% VO2 peak), 30 min, walking | Until end of pregnancy | No reported | Averaged across all exercise sessions | Data in forest plot |
| Mottola, 2013, Non RCT intervention(3) | E: 24  C (non-pregnant exercise): 16 | E: 33.5 ± 0.7 C: 33.0 ± 2.1, 16-20 wks’ gestation | Physically active | Objective (HR monitor) & self-report (exercise logs) | 3-4 days/wk, 95% VT from pregnancy, 25-40 min, walking | 34-38 wks’ gestation |  | 34-38 wks’ gestation  95% VT from early pregnancy, 25-40 min, walking | Data in forest plot |
| Mustila, 2013, Non RCT intervention (57) | E: 96 C: 89 | E: 30.9 (29.7-32) C: 30.1 (29.0-31.2), 10-18 wks’ gestation |  | Self-reported | 2+ days/wk, until at least slightly out of breath, 2.5 hours/wk, aerobic and resistance training |  | 87.5% women attended first counselling session; 59.4% attended second counselling session |  | Narrative Summary  FBG @ 26-28wks’ gestation Mean (95% CI):  E: 4.8 (4.7,4.8)  C: 4.9 (4.8,5.0)  *p*=0.12 |
| Wolfe, 2003, Non RCT (14) | E: 9  C: 18 | E: 28.3 ± 0.4  C: 28.3 ± 0.1, 19.2 ± 0.8 | Sedentary | Objective (supervised) | 3 days/wk, vigorous-to-high (70-75%HRmax), 14-25 min, cycling | Until delivery | TM 2: 80 ± 3%  TM3: 73 ± 4% | Study entry, TM2, TM3  vigorous-to high (RPE: 18 on 20 pt scale), graded exercise test – increases of 20 W/min, cycling | Narrative Summary  Report mean difference between pre-to post-exercise blood glucose values  E: 6.5mmol/L  C: 2.5 mmol/L  Glucose values increased in the control group, but not in the exercise group with advancing gestation. Observed a hypoglycemic effect of exercise in the control group (decrease in glucose values), but not the exercise group by the third trimester of pregnancy |
| Davenport, 2008, Non RCT intervention (12) | E: 10 C: 20 | E: 33.4 ± 3.3 C: 33.3 ± 5.3, > 34 wks’ gestation (after GDM diagnosis) | GDM, OW/OB | Objective (supervised/ pedometer) | 2-4 days/wk, low intensity (30% age predicted HRR), 25-40 min, walking | Minimum of 6 wks |  | Averaged across all exercise sessions | Data in forest plot |
| Anjana, 2016, Non RCT intervention (58) | GDM: 189 Healthy: 606 | GDM: 29.0 ± 6.0 Healthy: 27.0 ± 5.0, less than 28 wks’ gestation | GDM | Self-reported | Walking various pedometer | 12 wks’ gestation | 80%; 151 out of 189 completed both pre and post-PA questionnaire |  | Narrative Summary  FBG - Median (IQR)  Before: 4.9 (0.9)  After: 4.7 (0.7)  *p*<0.001 |
| Clapp, 1991, Cohort (59) | E (ran): 40  E (aerobic): 35 | Not reported |  | Self-report | Participants maintained their regular routine (60% of their preconception PA levels) |  |  | Throughout pregnancy  Representative of the participants’ regular exercise intensity, 20 min, treadmill run or standardized aerobic exercise | Data in forest plot |
| Clapp, 1998, Cohort(17) | 12 | 26-37 |  | Objective (supervised) | 3 days/wk, moderate (55% VO2 max), 20 min, walking |  |  |  | Narrative Summary  The mean difference between conditions, (condition 1: diet containing aboriginal types of carbohydrates, condition 2: diet containing cafeteria types of carbohydrates) with regards to glycemic responses to exercise, was 2.3 mg/min *p*<0.05) |
| Lotgering, 1998, Cohort(4) | 22 | 33.8 ± 0.8 |  |  |  |  |  | 30-34 wks’ gestation  Endurance: high (70-75% VO2 peak) Peak test: high intensity, Endurance: 40 min Peak: variable, cycling | Data in forest plot |
| Bessinger, 2002, Cohort (15) | 13 | 32 ± 4 | Active (aerobics 2-3 days/wk, 30 min) |  |  |  |  | Tested in TM2 & TM3  (65% HRmax), 30 min, walking | Data in forest plot |
| Clapp, 1987, Cohort (16) | 10 | 30.4 ± 2.7 | Rec runners |  |  |  |  | TM2: 19-22 wks’ gestation  TM3: 30-33wks’ gestation  Steady state, 28 min, running | Data in forest plot |
| Clapp, 2008, Cohort (60) | E: 87 C: 55 |  |  | Self-reported | 3+ days/wk, >50%VO2 max, 30+ min, Running (LTPA) |  |  |  | Data in forest plot |
| Makela, 2013, Cohort (61) | OW/OB: 90  NW: 73 | OW/OB: 30.6 ± 4.6 NW: 30.3 ± 4.6, contacted 20 wks’ gestation | One group OW/OB | Self-reported | 2-3 days/wk, not reported, 30-60 min, various |  |  |  | Narrative Summary  FBG in third trimester of pregnancy  Regression glucose 0h: r2=0.27, F=5.88, p=0.0001, Beta exercise during pregnancy=-0.009  *p*>0.05 |
| Medek, 2016, Cohort (62) | NW: 87 OW: 45 OB: 45 | NW: 28.3 ± 4.9 OW: 29.9 ± 4.2 OB: 29.4 ± 4.4 | OW/OB | Self-reported | Not reported, moderate-to-vigorous, QI: (9.2 MET hours/week) Q2: (23.2 MET hours/week) Q3: (41.7 MET hours/week) Q4: (91.1 MET hours/week), various PA |  |  |  | Narrative Summary  FBG – change scores between active and inactive women @ 24-28 wks’ gestation (95% CI)  All women active vs inactive:  -0.15 (-0.27, -0.03)  NW active vs. inactive:  -0.14 (-0.27, -0.00)  OW/OB active vs inactive:  -0.16 (-0.36, 0.04) |
| Artal, 1986, Cross-sectional (20) | Light: 15  Moderate: 15  Vigorous: 15 | Not reported |  |  |  |  |  | 34-35 wks’ gestation  light: 2.0mph, moderate: 2.0mph @ 10% incline, vigorous: 2.5mph incline increases 2% every minute; light/moderate:15 min, vigorous: to exhaustion | Data in forest plot |
| Hauth, 1982, Cross-sectional (24) | 7 | Not reported | Jogged at least 1.5 miles 3+ days/wk prior to and during pregnancy |  |  |  |  | 28-38 wks’ gestation  1.5 miles, 12-14.5 min, jogging | Narrative Summary  Drop post-exercise of 1.2 mmol/L. |
| Jovanovic, 1985, Cross-sectional (25) | 6 | 28.5 ± 1.7 |  |  |  |  |  | TM3  Moderate (“normal day” up to 50% VO2 max), 15 min, cycling | Data in forest plot  Narrative Summary  Larger decreases in blood glucose values post-exercise in the last week of the intervention compared to the first week of the intervention |
| Avery, 2001, Cross-section (6) | 13 | 31.92 ± 3.64 | GDM (not receiving insulin); not exercising regularly |  |  |  |  | 30-34 wks’ gestation  Low: 35% VO2 max  Moderate: 55% VO2 max, 30 min, cycling | Data in forest plot |
| Young, 1991, Cross-sectional (28) | 5 | 29 ± 2.1 |  |  |  |  |  | 33 wks’ gestation  Moderate (50% VO2 max), 30 min, cycling | Narrative Summary  No difference in plasma glucose response to an OGTT between the control and the exercise condition |
| Lesser, 1996, Cross sectional (26) | GDM: 6  Healthy: 5 | GDM: 27.6 ± 2.8 HP: 23.7 ± 2.0 | GDM |  |  |  |  | 28-38 wks’ gestation  Vigorous (60% VO2 max), 30 min cycling | Narrative Summary  No difference in plasma glucose in response to an OGTT between exercise (14h prior) and control condition |
| Cowett, 1996, Cross-sectional (7) | 5 | 29-39 |  |  |  |  |  | 32-35 wks’ gestation  Vigorous (60% VO2 max), 30 min, cycling | Data in forest plot |
| Artal, 1985, Cross-sectional (5) | Diabetic: 13  Healthy: 42 | Diabetic: 28 ± 6.1  HP: 29 ± 7.5 | Diabetic (receiving insulin therapy), women were considered unfit |  |  |  |  | Light (2 mph), 15 min, walking | Data in forest plot |
| Artal, 1981, Cross-sectional (19) | 23 | 29 ± 1 | No formal athletic training |  |  |  |  | 34 ± 0.8 wks’ gestation  Light (2 mph), 15 min, walking | Data in forest plot |
| Halse, 2013, Cross-sectional (23) | 12 | 31.9 ± 3.6 |  |  |  |  |  | 29.9 ± 2.4 wks’ gestation  Self-paced: work as hard as you feel comfortable, 30 min, condition 1: walking condition 2: cycling | Data in forest plot |
| Soultanakis, 1996, Cross-sectional (8) | 12 | 33.3 ± 1.6 |  |  |  |  |  | 25-35 wks’ gestation  Moderate (50-60% VO2 max), 60 min, cycling | Data in forest plot |
| Bonen, 1992, Cross-sectional (21) | TM2: 6  TM3: 8 | Mean (SEM):  TM2: 30.4 ± 1.0  TM3: 29 ± 1.0 |  |  |  |  |  | TM2  TM3  Moderate TM2: (67W) TM3: (78W), 30 min, cycling | Data in forest plot |
| McMurray, 1995, Cross-sectional (27) | 10 | 32 ± 5 |  |  |  |  |  | 22-28 wks’ gestation  Vigorous-to high, 40 min, Condition 1: Aerobic dance, Condition 2:  Walking | Data in forest plot |
| T2D, type 2 diabetes; LTPA, leisure time physical activity; wks, weeks; E, exercise; C, control; RCT, randomized controlled trial; PA, physical activity; MET, metabolic equivalents; GDM, gestational diabetes mellitus; HR, heart rate; IQR, interquartile range; FBG, fasting blood glucose; OW, overweight; OB, obese; TM2, second trimester; TM3, third trimester. | | | | | | | | | |

Table 2: The association between prenatal exercise (acute) and glucose response.

| **Quality assessment** | | | | | | | **№ of participants** | **Effect** | | **Quality** | **Importance** |
| --- | --- | --- | --- | --- | --- | --- | --- | --- | --- | --- | --- |
| **№ of studies** | **Study design** | **Risk of bias** | **Inconsistency** | **Indirectness** | **Imprecision** | **Other considerations** | **Acute prenatal exercise** | **Relative (95% CI)** | **Absolute (95% CI)** |
| Association between prenatal exercise and glucose response from before to during exercise | | | | | | | | | | | |
| 6 i | observational studies | not serious | not serious | not serious | not serious | none | 123 | - | MD **0.94 lower** (1.18 lower to 0.7 lower) | ⨁⨁◯◯ LOW | CRITICAL |
| Association between prenatal exercise and glucose response from before to after exercise | | | | | | | | | | | |
| 23 (pooled estimate of effect, n = 17 j; 6 studies reported narratively) | observational studies | not serious a | serious b | not serious | not serious | none | 333 | - | MD **0.57 lower** (0.72 lower to 0.41 lower) | ⨁◯◯◯ VERY LOW | CRITICAL |
| Narrative Synthesis: Six studies were included (n=81) and all reported better glycemic control following exercise (Hauth, 1982; Clapp, 1998; Young, 1991; Lesser, 1996; Jovanovic-Peterson, 1989; Wolfe, 2003. | | |
| Subgroup analysis: Association between prenatal exercise and glucose response from before to after exercise of low intensity | | | | | | | | | | | |
| 6 l | observational studies | not serious | serious b | not serious | not serious | none | 78 | - | MD **0.93 lower** (1.39 lower to 0.46 lower) | ⨁◯◯◯ VERY LOW | CRITICAL |
| Subgroup analysis: Association between prenatal exercise and glucose response from before to after exercise of moderate intensity | | | | | | | | | | | |
| 13 (pooled estimate of effect, n = 8 n; 5 studies synthesized narratively) | observational studies | not serious c | serious b | not serious | not serious | none | 107 | - | MD **0.78 lower** (1.05 lower to 0.51 lower) | ⨁◯◯◯ VERY LOW | CRITICAL |
| Narrative Synthesis: Five studies were included (n=74).  2/5 reported no change in glucose after moderate intensity exercise (Lesser, 1996; Young, 1991)  3/5 reported an acute bout of moderate-intensity exercise resulted in a decline in blood glucose (Clapp, 1998; Jovanovic-Peterson, 1989; Wolfe, 2003). | | |
| Subgroup analysis: Association between prenatal exercise and glucose response from before to after exercise of vigorous intensity | | | | | | | | | | | |
| 10 (pooled estimate of effect, n = 9 i; 1 study reported narratively) | observational studies | not serious d | serious b | not serious | not serious | none | 154 | - | MD **0.34 lower** (0.54 lower to 0.15 lower) | ⨁◯◯◯ VERY LOW | CRITICAL |
| Narrative Summary: One study (n=7) indicated a decrease of in blood glucose values after an acute bout of vigorous-intensity exercise (Hauth, 1982). | | |
| Subgroup analysis: Association between prenatal exercise and glucose response from before to after exercise of 0-20 min | | | | | | | | | | | |
| 7 (pooled estimate of effect, n = 4 l; 3 studies synthesized narratively) | observational studies | not serious e | not serious | not serious | not serious | none | 139 | - | MD **0.28 lower** (0.43 lower to 0.14 lower) | ⨁⨁◯◯ LOW | CRITICAL |
| Narrative Synthesis: Three studies were included (n=38) and all reported a decrease in blood glucose following an acute bout of exercise of ≤20 min (Hauth, 1982; Clapp, 1998; Jovanovic-Peterson, 1989). | | |
| Subgroup analysis: Association between prenatal exercise and glucose response from before to after exercise of 21-39 min | | | | | | | | | | | |
| 9 (pooled estimate of effect, n = 7 m; 2 studies synthesized narratively) | observational studies | not serious f | serious b | not serious | not serious | none | 77 | - | MD **0.79 lower** (1.11 lower to 0.48 lower) | ⨁◯◯◯ VERY LOW | CRITICAL |
| Narrative Synthesis: Two studies were included and all reported no difference in glucose response to an oral glucose tolerance test after an exercise session of 24 to 30 minutes or after a resting period (control condition) (Lesser, 1996; Young, 1991). | | |
| Subgroup analysis: Association between prenatal exercise and glucose response from before to after exercise of ≥40 min | | | | | | | | | | | |
| 8 l | observational studies | not serious | not serious | not serious | not serious | none | 108 | - | MD **1.02 lower** (1.26 lower to 0.78 lower) | ⨁⨁◯◯ LOW | CRITICAL |
| Subgroup analysis: Association between prenatal exercise and glucose response from before to after exercise of unspecified duration | | | | | | | | | | | |
| 1 | observational studies | not serious | serious g | not serious | not serious h | none | Narrative summary: Wolfe (2003) reported a decline in blood glucose following exercise but did not specify exercise duration. | | | ⨁◯◯◯ VERY LOW | CRITICAL |
| Subgroup analysis: Association between prenatal exercise and glucose response from before to after exercise in women without GDM | | | | | | | | | | | |
| 14 k | observational studies | not serious | serious b | not serious | not serious | none | 285 | - | MD **0.46 lower** (0.6 lower to 0.32 lower) | ⨁◯◯◯ VERY LOW | CRITICAL |
| Subgroup analysis: Association between prenatal exercise and glucose response from before to after exercise in women with GDM | | | | | | | | | | | |
| 3 l | observational studies | not serious | not serious | not serious | not serious | none | 26 | - | MD **1.42 lower** (1.69 lower to 1.16 lower) | ⨁⨁◯◯ LOW | CRITICAL |
| Subgroup analysis: Association between prenatal exercise and glucose response from before to after exercise in women with previously unspecified physical activity levels | | | | | | | | | | | |
| 12 o | observational studies | not serious | serious b | not serious | not serious | none | 231 | - | MD **0.54 lower** (0.73 lower to 0.36 lower) | ⨁◯◯◯ VERY LOW | CRITICAL |
| Subgroup analysis: Association between prenatal exercise and glucose response from before to after exercise in women who were previously active | | | | | | | | | | | |
| 4 l | observational studies | not serious | not serious | not serious | not serious | none | 57 | - | MD **0.49 lower** (0.74 lower to 0.24 lower) | ⨁⨁◯◯ LOW | CRITICAL |
| Subgroup analysis: Association between prenatal exercise and glucose response from before to after exercise in women who were previously inactive | | | | | | | | | | | |
| 1 p | observational studies | not serious | serious g | not serious | not serious h | none | 12 | - | MD **1.26 lower** (1.66 lower to 0.87 lower) | ⨁◯◯◯ VERY LOW | CRITICAL |

**CI:** Confidence interval; **MD:** Mean difference

#### **Explanations**

a. No serious risk of bias. Reporting bias was an issue in 6 studies (results were reported narratively).

b. Serious inconsistency. High heterogeneity (I2 ≥ 50%).

c. No serious risk of bias. Reporting bias was an issue in 5 studies (results were reported narratively).

d. No serious risk of bias. Reporting bias was an issue in one study (results were reported narratively).

e. No serious risk of bias. Reporting bias was an issue in 3 studies (results were reported narratively).

f. No serious risk of bias. Reporting bias was an issue in 2 studies (results were reported narratively).

g. Serious inconsistency. Only one study was included.

h. No serious imprecision; only one study but already downgraded for serious inconsistency for this reason.

i. Four studies reported data on different sub-groups of women. These studies were counted only once.

j. Nine studies reported data on different sub-groups of women. These studies were counted only once.

k. Eight studies reported data on different sub-groups of women. These studies were counted only once.

l. Two studies reported data on different sub-groups of women. These studies were counted only once.

m. Six studies reported data on different sub-groups of women. These studies were counted only once.

n. Three studies reported data on different sub-groups of women. These studies were counted only once.

o. Seven studies reported data on different sub-groups of women. These studies were counted only once.

p. One study reported data on different sub-groups of women. This study was counted only once.

Table 3: The association between prenatal exercise (acute) and hypoglycemia.

| **Quality assessment** | | | | | | | **№ of participants** | **Effect** | | **Quality** | **Importance** |
| --- | --- | --- | --- | --- | --- | --- | --- | --- | --- | --- | --- |
| **№ of studies** | **Study design** | **Risk of bias** | **Inconsistency** | **Indirectness** | **Imprecision** | **Other considerations** | **Acute prenatal exercise** | **Relative (95% CI)** | **Absolute (95% CI)** |
| Association between prenatal exercise and maternal hypoglycemia during exercise | | | | | | | | | | | |
| 8 | observational studies | not serious | not serious | not serious | not serious | none | 194 | **OR 0.00** (0.00 to 0.04) | **-- per 1 000** (from -- to 0 fewer) | ⨁⨁◯◯ LOW | CRITICAL |
| Subgroup analysis: Association between prenatal exercise and maternal hypoglycemia after exercise in women without GDM | | | | | | | | | | | |
| 3 | observational studies | not serious | not serious | not serious | not serious | none | 96 | **OR 0.01** (0.00 to 0.66) | **0 fewer per 1 000** (from -- to 1 fewer) | ⨁⨁◯◯ LOW | CRITICAL |
| Subgroup analysis: Association between prenatal exercise and maternal hypoglycemia after exercise in women with GDM | | | | | | | | | | | |
| 5 | observational studies | not serious | not serious | not serious | not serious | none | 98 | **OR 0.000** (0.000 to 0.004) | **-- per 1 000** (from -- to 0 fewer) | ⨁⨁◯◯ LOW | CRITICAL |

**CI:** Confidence interval; **OR:** Odds ratio

Table 3: The association between prenatal exercise and fasting glucose post-intervention.

| **Quality assessment** | | | | | | | **№ of participants** | | **Effect** | | **Quality** | **Importance** |
| --- | --- | --- | --- | --- | --- | --- | --- | --- | --- | --- | --- | --- |
| **№ of studies** | **Study design** | **Risk of bias** | **Inconsistency** | **Indirectness** | **Imprecision** | **Other considerations** | **Prenatal exercise** | **No exercise** | **Relative (95% CI)** | **Absolute (95% CI)** |
| Association between prenatal exercise (exercise-only interventions and exercise + co-interventions) and fasting blood glucose post-intervention | | | | | | | | | | | | |
| 23 (pooled estimate of effect, n =20; 3 studies synthesized narratively) a | randomized trials | serious b | serious c | serious d | not serious | none | 3043 | 2889 | - | MD **0.32 lower** (0.45 lower to 0.19 lower) | ⨁◯◯◯ VERY LOW | CRITICAL |
| Narrative Synthesis: A total of 3 RCTs (intervention, n=236; control, n=200) are included.  2/3 did not find an impact of prenatal exercise on fasting blood glucose post-intervention (Garnaes, 2016; Hawkins, 2015).  1/3 found that an exercise plus diet intervention reduced fasting blood glucose concentrations (Koivusalo, 2016) | | | |
| Sensitivity analysis: Association between exercise-only interventions and fasting blood glucose post-intervention | | | | | | | | | | | | |
| 12 (pooled estimate of effect, n =11; 1 study reported narratively) | randomized trials | serious e | serious c | not serious | not serious | none | 1154 | 1090 | - | MD **0.48 lower** (0.76 lower to 0.19 lower) | ⨁⨁◯◯ LOW | CRITICAL |
| Narrative Summary: Garnaes (2016) did not find an impact of prenatal exercise on fasting blood glucose post-intervention (intervention, n=46, control, n=45). | | | |
| Sensitivity analysis: Association between exercise + co-interventions and fasting blood glucose post-intervention | | | | | | | | | | | | |
| 13 (pooled estimate of effect, n =11; 2 studies synthesized narratively) | randomized trials | serious f | serious c | serious g | not serious | none | 1889 | 1799 | - | MD **0.2 lower** (0.32 lower to 0.07 lower) | ⨁◯◯◯ VERY LOW | CRITICAL |
| Narrative Synthesis: A total of 2 RCTs (intervention, n=81; control, n=62) are included.  1/2 did not find an impact of prenatal exercise on fasting blood glucose post-intervention (Hawkins, 2015).  1/2 found that an exercise plus diet intervention reduced fasting blood glucose concentrations (Koivusalo, 2016). | | | |
| Subgroup analysis: Association between exercise-only interventions and fasting blood glucose post-intervention in women without diabetes | | | | | | | | | | | | |
| 10 (pooled estimate of effect, n =9; 1 study reported narratively) | randomized trials | serious e | serious c | not serious | serious h | none | 1119 | 1055 | - | MD **0.05 lower** (0.16 lower to 0.05 higher) | ⨁◯◯◯ VERY LOW | CRITICAL |
| Narrative Summary: Garnaes (2016) did not find an impact of prenatal exercise on fasting blood glucose post-intervention (intervention, n=46, control, n=45). | | | |
| Subgroup analysis: Association between exercise-only interventions and fasting blood glucose post-intervention in women with diabetes | | | | | | | | | | | | |
| 2 | randomized trials | serious i | serious c | not serious | not serious | none | 35 | 35 | - | MD **2.76 lower** (3.18 lower to 2.34 lower) | ⨁⨁◯◯ LOW | CRITICAL |
| Subgroup analysis: Association between exercise-only interventions and fasting blood glucose post-intervention in women with previously unspecified physical activity levels | | | | | | | | | | | | |
| 9 | randomized trials | serious k | serious c | not serious | not serious | none | 1048 | 938 | - | MD **0.58 lower** (0.91 lower to 0.24 lower) | ⨁⨁◯◯ LOW | CRITICAL |
| Subgroup analysis: Association between exercise-only interventions and fasting blood glucose post-intervention in women who were previously active | | | | | | | | | | | | |
| 1 | randomized trials | serious l | serious m | not serious | not serious n | none | 100 | 146 | - | MD **0.3 lower** (0.43 lower to 0.17 lower) | ⨁⨁◯◯ LOW | CRITICAL |
| Subgroup analysis: Association between exercise-only interventions and fasting blood glucose post-intervention in women who were previously inactive | | | | | | | | | | | | |
| 1 (pooled estimate of effect, n =1; 1 study reported narratively) | randomized trials | not serious o | serious m | not serious | not serious n | none | 6 | 6 | - | MD **0.3 higher** (0.21 lower to 0.81 higher) | ⨁⨁⨁◯ MODERATE | CRITICAL |
| Narrative Summary: Garnaes (2016) did not find an impact of prenatal exercise on fasting blood glucose post-intervention (intervention, n=46, control, n=45). | | | |
| Subgroup analysis: Association between exercise-only interventions and fasting blood glucose post-intervention in women who were supervised during exercise | | | | | | | | | | | | |
| 8 (pooled estimate of effect, n =7; 1 study reported narratively) | randomized trials | serious p | serious c | not serious | not serious | none | 935 | 951 | - | MD **0.76 lower** (1.19 lower to 0.32 lower) | ⨁⨁◯◯ LOW | CRITICAL |
| Narrative Summary: Garnaes (2016) did not find an impact of prenatal exercise on fasting blood glucose post-intervention (intervention, n=46, control, n=45). | | | |
| Subgroup analysis: Association between exercise-only interventions and fasting blood glucose post-intervention in women who were unsupervised during exercise | | | | | | | | | | | | |
| 4 | randomized trials | serious j | not serious | not serious | serious h | none | 219 | 139 | - | MD **0.04 lower** (0.17 lower to 0.08 higher) | ⨁⨁◯◯ LOW | CRITICAL |

**CI:** Confidence interval; **MD:** Mean difference

#### **Explanations**

a. Two studies included two intervention arms (exercise-only intervention and exercise + co-intervention). These studies were counted only once.

b. Serious risk of bias. High risk of performance bias. Unclear risk of selection bias; it was unclear if allocation was adequately concealed. Reporting bias was an issue in 3 studies (results were reported narratively).

c. Serious inconsistency. High heterogeneity (I2 ≥50%).

d. Serious indirectness. Exercise-only interventions and exercise + co-interventions were combined for analysis.

e. Serious risk of bias. High risk of performance bias. Unclear risk of selection bias; it was unclear if allocation was adequately concealed. Reporting bias was an issue in one study (results were reported narratively).

f. Serious risk of bias. High risk of performance bias. Unclear risk of selection bias; it was unclear if allocation was adequately concealed. Reporting bias was an issue in 2 studies (results were reported narratively).

g. Serious indirectness. Exercise was combined with a co-intervention.

h. Serious imprecision. The 95% CI crossed the line of no effect, and was wide, such that interpretation of the data would be different if the true effect were at one end of the CI or the other.

i. Serious risk of bias. High risk of performance bias and attrition bias. Unclear risk of selection bias; it was unclear if sequence was adequately generated and if allocation was adequately concealed.

j. Serious risk of bias. High risk of performance bias.

k. Serious risk of bias. High risk of performance bias. Unclear risk of selection bias; was unclear if allocation was adequately concealed.

l. Serious risk of bias. High risk of performance bias (women who performed <80% of prescribed exercise sessions were excluded) and attrition bias. Unclear risk of selection bias; it was unclear if sequence was adequately generated and if allocation was adequately concealed.

m. Serious inconsistency. Only one study was included.

n. No serious imprecision; only one study but already downgraded for serious inconsistency for this reason.

o. No serious risk of bias. Unclear risk of selection bias; it was unclear if sequence was adequately generated and if allocation was adequately concealed. Reporting bias was an issue in one study (results were reported narratively).

p. Serious risk of bias. High risk of performance bias (women who performed <80% of prescribed exercise sessions were excluded) and attrition bias. Unclear risk of selection bias; it was unclear if sequence was adequately generated and if allocation was adequately concealed. Reporting bias was an issue in one study (results were reported narratively).

Table 4: The association between prenatal exercise and insulin requirement to manage gestational diabetes.

| **Quality assessment** | | | | | | | **№ of participants** | | **Effect** | | **Quality** | **Importance** |
| --- | --- | --- | --- | --- | --- | --- | --- | --- | --- | --- | --- | --- |
| **№ of studies** | **Study design** | **Risk of bias** | **Inconsistency** | **Indirectness** | **Imprecision** | **Other considerations** | **Prenatal exercise** | **No exercise** | **Relative (95% CI)** | **Absolute (95% CI)** |
| Association between prenatal exercise (exercise-only interventions and exercise + co-interventions) and insulin requirement to manage GDM | | | | | | | | | | | | |
| 10 (pooled estimate of effect, n = 9; 1 study reported narratively) | randomized trials | not serious a | not serious | serious b | serious c | none | 61/929 (6.6%) | 79/911 (8.8%) | **OR 0.75** (0.48 to 1.18) | **20 fewer per 1 000** (from 14 more to 44 fewer) | ⨁⨁◯◯ LOW | CRITICAL |
| Narrative Summary: One study (intervention group, n=132, control group, n=133) showed that an exercise + co-intervention did not reduce the number of women who required insulin (Wang, 2016). | | | |
| Sensitivity analysis: Association between exercise-only interventions and insulin requirement to manage GDM | | | | | | | | | | | | |
| 2 | randomized trials | not serious | serious d | not serious | serious c | none | 11/47 (23.4%) | 20/46 (43.5%) | **OR 0.60** (0.06 to 5.70) | **119 fewer per 1 000** (from 380 more to 391 fewer) | ⨁⨁◯◯ LOW | CRITICAL |
| Sensitivity analysis: Association between exercise + co-interventions and insulin requirement to manage GDM | | | | | | | | | | | | |
| 8 (pooled estimate of effect, n = 7; 1 study reported narratively) | randomized trials | not serious a | not serious | serious e | serious c | none | 50/872 (5.7%) | 59/856 (6.9%) | **OR 0.82** (0.54 to 1.25) | **12 fewer per 1 000** (from 16 more to 30 fewer) | ⨁⨁◯◯ LOW | CRITICAL |
| Narrative Summary: One study (intervention group, n=132, control group, n=133) showed that an exercise + co-intervention did not reduce the number of women who required insulin (Wang, 2016). | | | |
| Evidence from non-randomized interventions: Association between prenatal exercise (exercise-only interventions and exercise + co-interventions) and insulin requirement to manage GDM | | | | | | | | | | | | |
| 2 | observational studies f | serious g | not serious | serious b | serious c | none | 20/49 (40.8%) | 36/77 (46.8%) | **OR 0.83** (0.39 to 1.78) | **46 fewer per 1 000** (from 142 more to 212 fewer) | ⨁◯◯◯ VERY LOW | CRITICAL |
| Evidence from non-randomized interventions, sensitivity analysis: Association between exercise-only interventions and insulin requirement to manage GDM | | | | | | | | | | | | |
| 1 | observational studies f | not serious | serious h | not serious | not serious i | none | 7/10 (70.0%) | 14/20 (70.0%) | **OR 1.00** (0.19 to 5.24) | **0 fewer per 1 000** (from 224 more to 393 fewer) | ⨁◯◯◯ VERY LOW | CRITICAL |
| Evidence from non-randomized interventions, sensitivity analysis: Association between exercise + co-interventions and insulin requirement to manage GDM | | | | | | | | | | | | |
| 1 | observational studies f | serious g | serious h | serious e | not serious i | none | 13/39 (33.3%) | 22/57 (38.6%) | **OR 0.80** (0.34 to 1.87) | **51 fewer per 1 000** (from 154 more to 210 fewer) | ⨁◯◯◯ VERY LOW | CRITICAL |
| Association between prenatal exercise (exercise-only intervention and exercise + co-intervention) and the amount of insulin required to manage GDM | | | | | | | | | | | | |
| 3 | randomized trials | not serious | not serious | serious b | not serious | none | 16 | 29 | - | MD **0.08 lower** (0.16 lower to 0.01 lower) | ⨁⨁⨁◯ MODERATE | CRITICAL |
| Sensitivity analysis: Association between exercise-only intervention and the amount of insulin required to manage GDM | | | | | | | | | | | | |
| 1 | randomized trials | not serious | serious h | not serious | not serious i | none | 7 | 18 | - | MD **0.05 lower** (0.15 lower to 0.05 higher) | ⨁⨁⨁◯ MODERATE | CRITICAL |
| Sensitivity analysis: Association between exercise + co-intervention and the amount of insulin required to manage GDM | | | | | | | | | | | | |
| 2 | randomized trials | not serious | not serious | not serious | serious c | none | 9 | 11 | - | MD **0.13 lower** (0.29 lower to 0.03 higher) | ⨁⨁⨁◯ MODERATE | CRITICAL |
| Evidence from non-randomized intervention: Association between exercise-only intervention and the amount of insulin required to manage GDM | | | | | | | | | | | | |
| 1 | observational studies f | not serious | serious h | not serious | not serious i | none | 7 | 14 | - | MD **0.34 lower** (0.56 lower to 0.12 lower) | ⨁◯◯◯ VERY LOW | CRITICAL |

**CI:** Confidence interval; **OR:** Odds ratio; **MD:** Mean difference; **BMI**: body mass index

#### **Explanations**

a. No serious risk of bias. Unclear risk of selection bias; it was unclear if allocation was adequately concealed. Reporting bias was an issue in one study (incomplete reporting of data such that it could not be included in the meta-analysis; results were reported narratively).

b. Serious indirectness. Exercise-only interventions and exercise + co-interventions were combined for analysis.

c. Serious imprecision. The 95% CI crossed the line of no effect, and was wide, such that interpretation of the data would be different if the true effect were at one end of the CI or the other.

d. Serious inconsistency. High heterogeneity (I2≥50%).

e. Serious indirectness. Exercise was combined with a co-intervention.

f. Non-randomized interventions

g. Serious risk of bias. High risk of performance bias.

h. Serious inconsistency. Only one study was included.

i. No serious imprecision; only one study but already downgraded for serious inconsistency for this reason.

**Supplemental Figures**

*
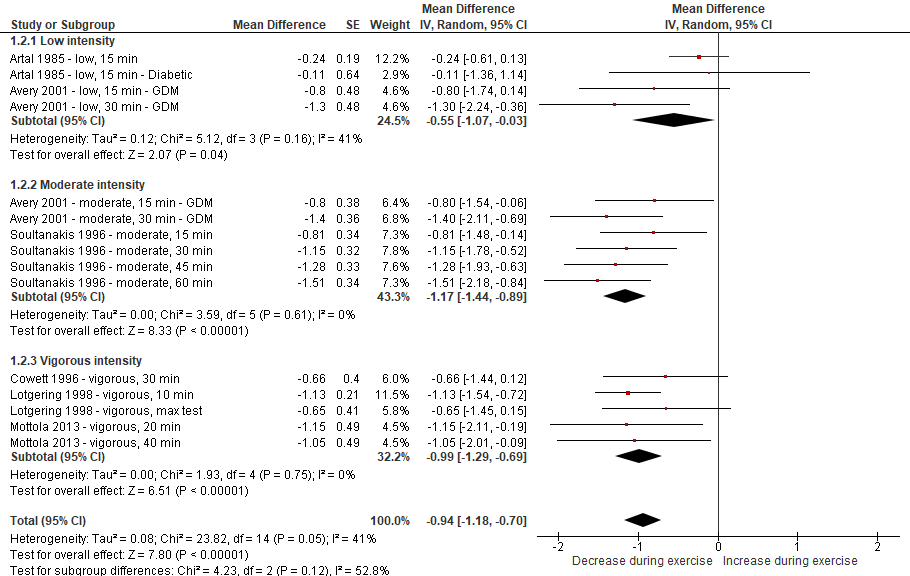
*

*Online Supplement Figure 1.* Impact of acute prenatal exercise on glycemic response from pre- to during exercise. Subgroup analyses were conducted with studies including exercise of low intensity and with those including exercise of moderate or vigorous intensity. Blood glucose values reported in mmol/L. Analyses conducted with a random effects model. CI, confidence interval; df, degrees of freedom; IV, inverse variance; SE, standard error; GDM, gestational diabetes mellitus; min, minutes.

*Online Supplement Figure 2*. Spline regression of the mean change in circulating blood glucose concentrations during an acute bout of exercise of increasing volume of exercise per session (MET minutes per sessions). Pre vs. during-exercise mean differences were used. Blood glucose values reported in mmol/L. Black line, line of best fit; red line, mean difference of 0 shaded area, 95% CI. Circle size is related to the weight of the study in the regression.

*
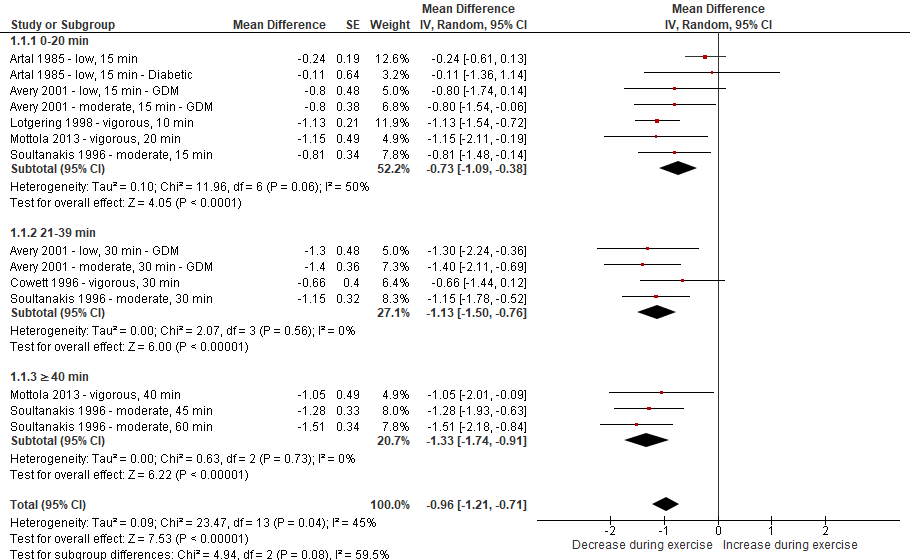
*

*Online Supplement Figure 3*. Impact of acute prenatal exercise on glycemic response from pre- to during exercise. Subgroup analyses were conducted by duration of exercise: ≤20, 21-39, ≥40 min. Blood glucose values reported in mmol/L. Analyses conducted with a random effects model. CI, confidence interval; df, degrees of freedom; IV, inverse variance; SE, standard error; GDM, gestational diabetes mellitus.


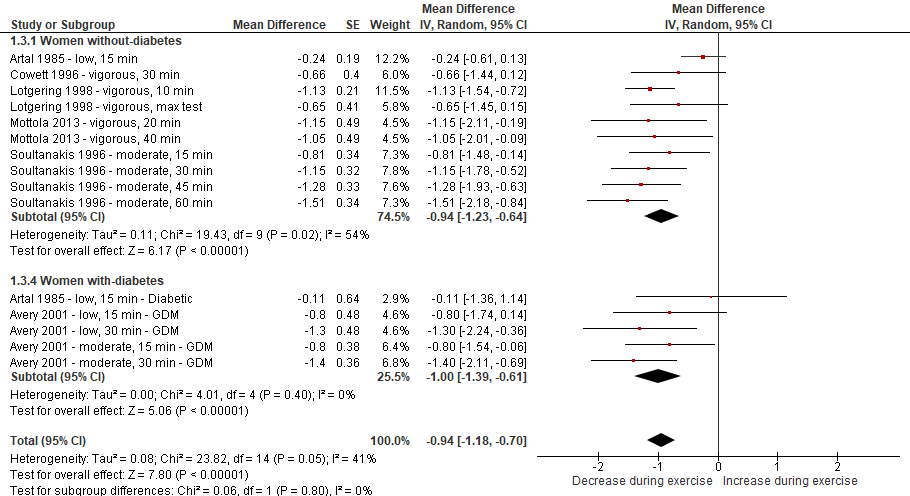


*Online Supplement Figure 4:* Impact of acute prenatal exercise on glycemic response from pre- to during exercise. Subgroup analyses were comparing women with and without diabetes. Blood glucose values reported in mmol/L. Analyses conducted with a random effects model. CI, confidence interval; df, degrees of freedom; IV, inverse variance; SE, standard error; GDM, gestational diabetes mellitus.

*
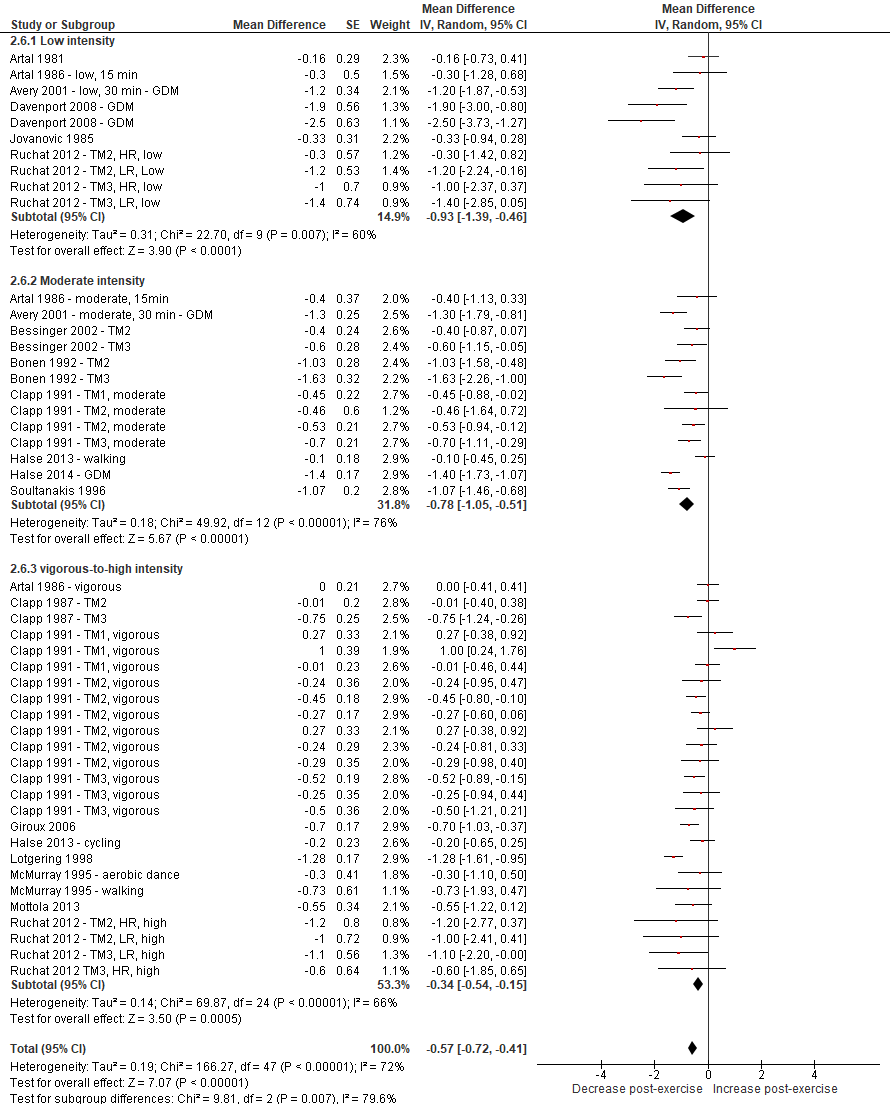
*

*Online Supplement Figure 5.* Impact of acute prenatal exercise on glycemic response from pre- to post-exercise. Subgroup analyses were conducted with studies including exercise of low intensity with that of moderate or vigorous intensity. Blood glucose values reported in mmol/L. Analyses conducted with a random effects model. CI, confidence interval; df, degrees of freedom; IV, inverse variance; SE, standard error; GDM, gestational diabetes mellitus; TM2, second trimester, TM3, third trimester; LR, low risk of GMD; HR, high risk of GDM.

Online Supplement Figure 6. Linear regression of the mean change in circulating blood glucose concentrations following an acute bout of exercise of increasing volume of exercise per session (MET minutes per sessions). Pre vs. post-exercise mean differences were used. Blood glucose values reported in mmol/L. Black line, line of best fit; red line, mean difference of 0 shaded area, 95% CI. Circle size is related to the weight of the study in the regression.

*
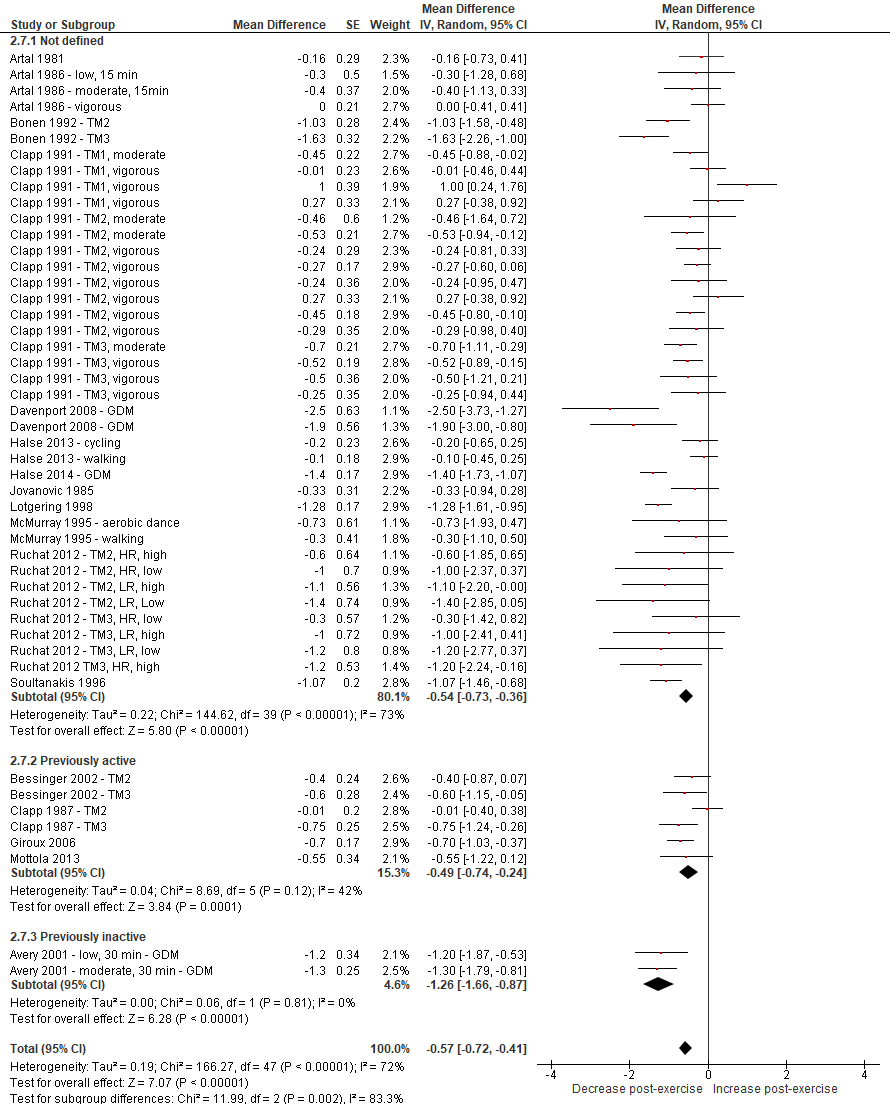
*

*Online Supplement Figure 7.* Impact of acute prenatal exercise on glycemic response from pre- to post-exercise. Subgroup analyses were stratified by pre-pregnancy physical activity status (active vs. inactive). Blood glucose values reported in mmol/L. Analyses conducted with a random effects model. CI, confidence interval; df, degrees of freedom; IV, inverse variance; SE, standard error; GDM, gestational diabetes mellitus; TM2, second trimester, TM3, third trimester; LR, low risk of GMD; HR, high risk of GDM.


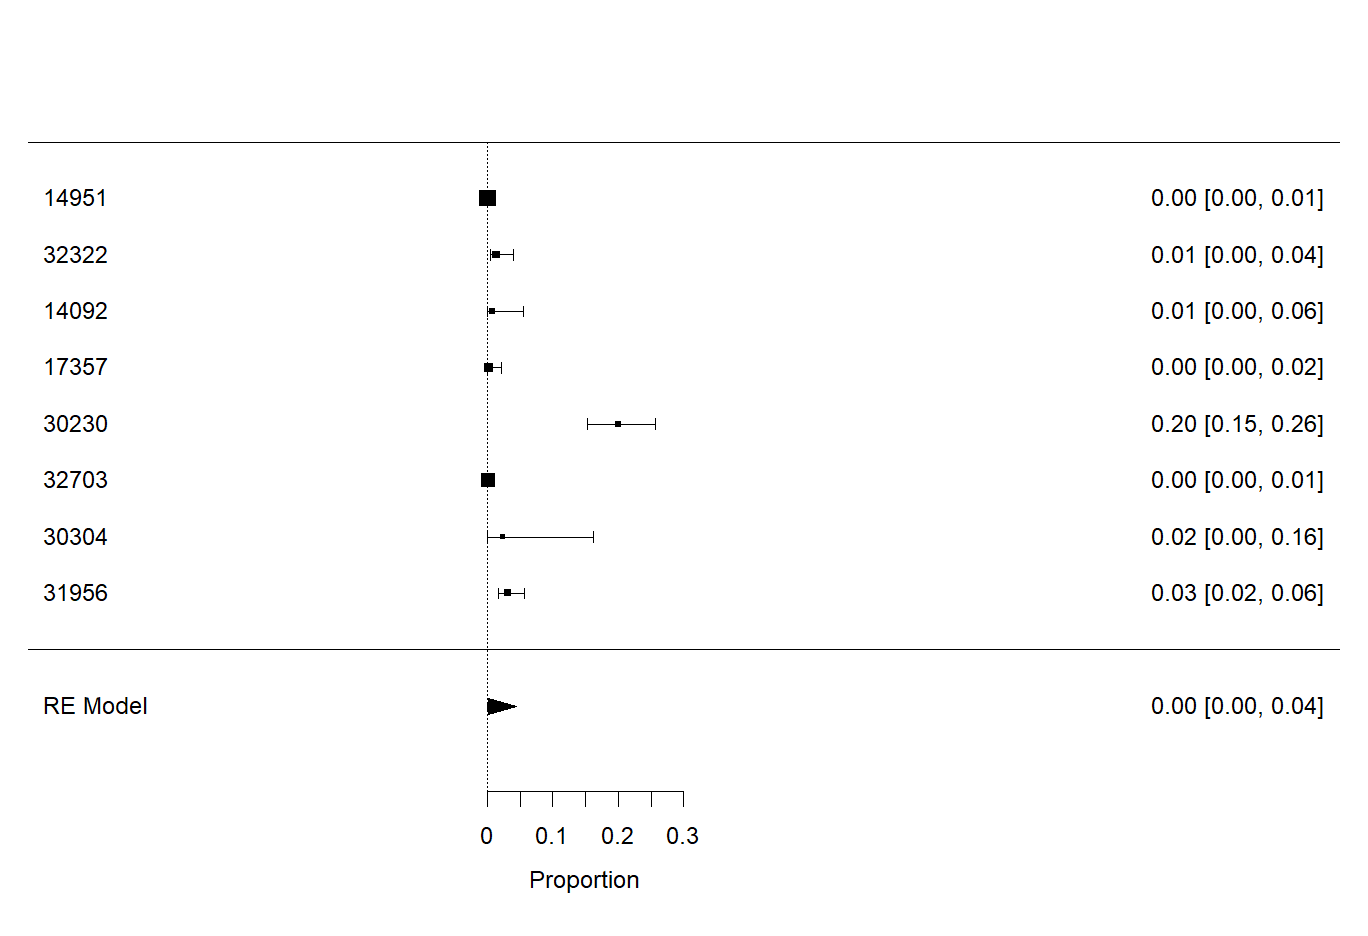
*Online Supplement Figure 8.* Proportion of hypoglycemic events in response to acute prenatal exercise. Incidence of hypoglycemia following acute exercise was used and pooled proportion of hypoglycemic events was obtained through random effects pooling of logit-transformed proportions.


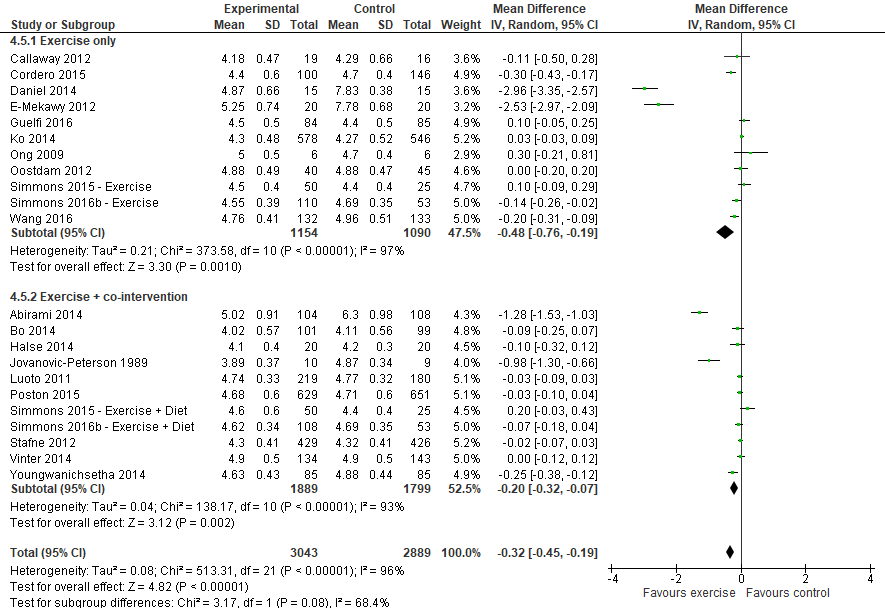


*Online Supplement Figure 9:* Randomized controlled trials examining the impact of prenatal exercise on fasting glucose concentration post-intervention. Subgroup analyses were conducted comparing “exercise only” versus “exercise + co-intervention” trials. Blood glucose values reported in mmol/L. Analyses conducted with a random effects model. CI, confidence interval; df, degrees of freedom; IV, inverse variance.


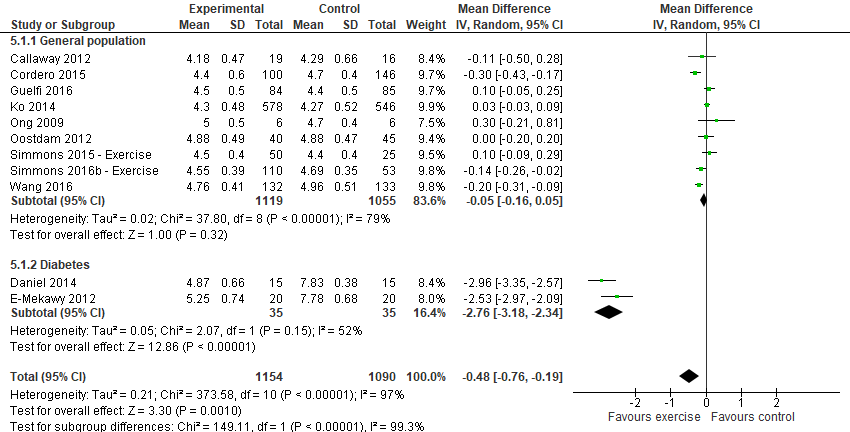


Online Supplement Figure 10: Randomized controlled trials examining the impact of prenatal exercise on fasting glucose concentration post-intervention. Subgroup analyses were conducted comparing women with diabetes versus women without diabetes. Blood glucose values reported in mmol/L. Analyses conducted with a random effects model. CI, confidence interval; df, degrees of freedom; IV, inverse variance.


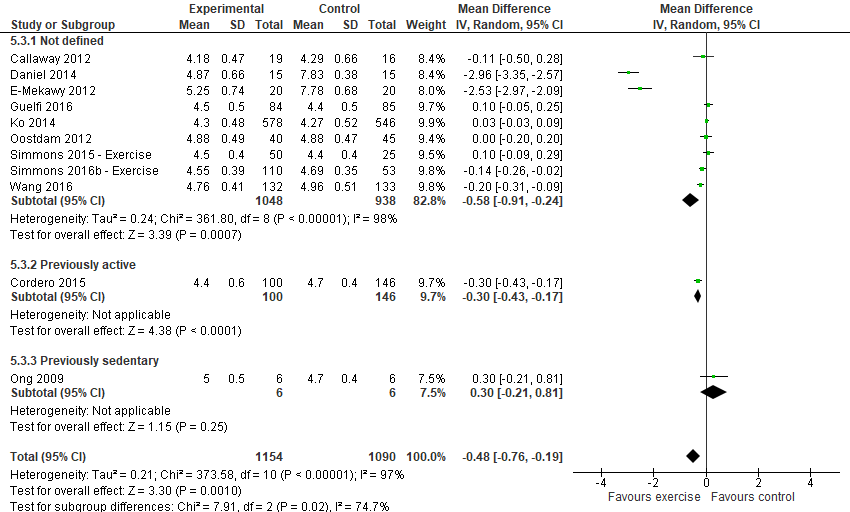


Online Supplement Figure 11: Randomized controlled trials examining the impact of prenatal exercise on fasting glucose concentration post-intervention. Subgroup analyses were conducted comparing women who were previously inactive, women who were previously active and women whose previous level of activity was not specified. Blood glucose values reported in mmol/L. Analyses conducted with a random effects model. CI, confidence interval; df, degrees of freedom; IV, inverse variance.


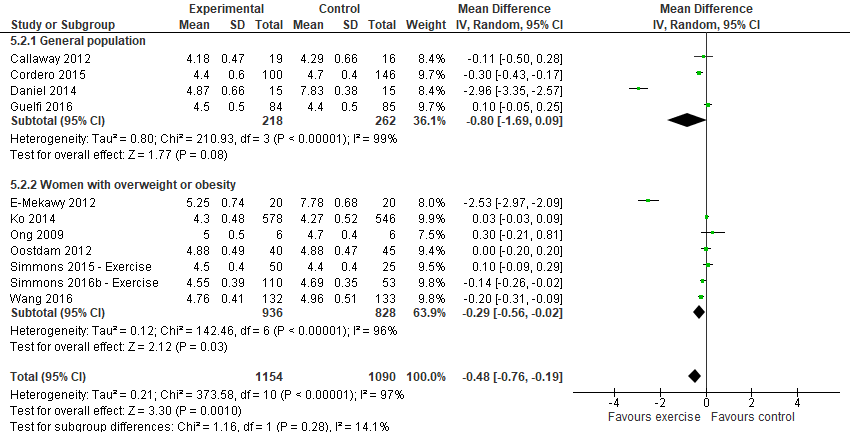


Online Supplement Figure 12: Randomized controlled trials examining the impact of prenatal exercise on fasting glucose concentration post-intervention. Subgroup analyses were conducted comparing women with overweight or obesity, with the general population. Blood glucose values reported in mmol/L. Analyses conducted with a random effects model. CI, confidence interval; df, degrees of freedom; IV, inverse variance.


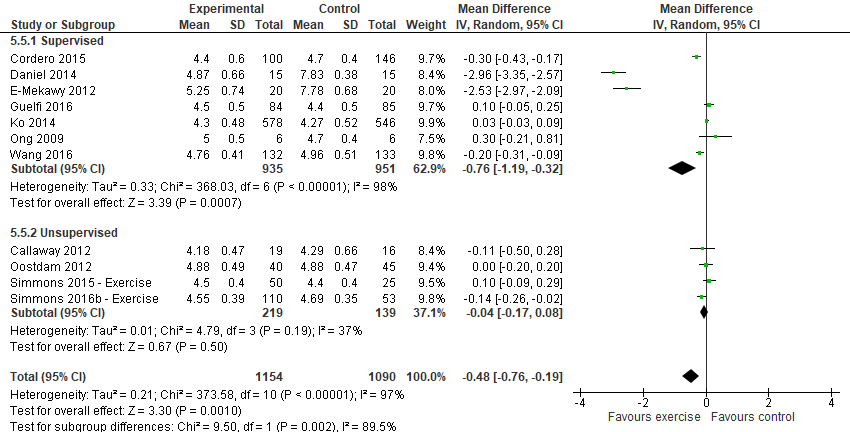


Online Supplement Figure 13: Randomized controlled trials examining the impact of prenatal exercise on fasting glucose concentration post-intervention. Subgroup analyses were conducted comparing women following supervised versus unsupervised exercise. Blood glucose values reported in mmol/L. Analyses conducted with a random effects model. CI, confidence interval; df, degrees of freedom; IV, inverse variance.

*
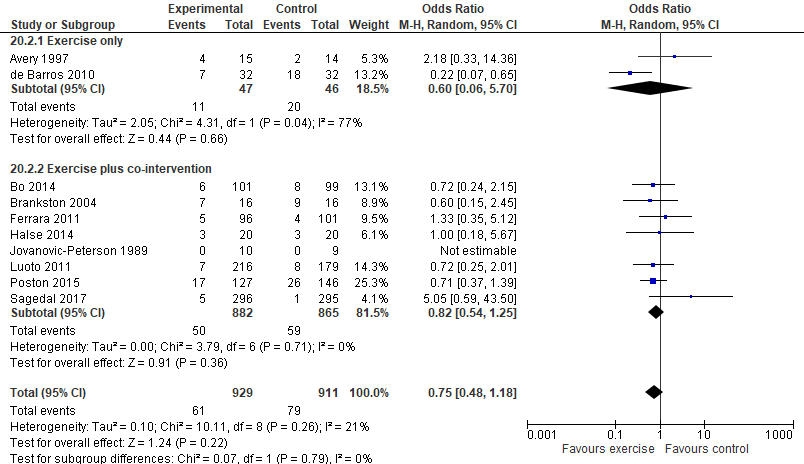
*

*Online Supplement Figure 14:* Randomized controlled trials examining the impact of prenatal exercise on the odds of insulin requirement for the management of GDM. Subgroup analyses were conducted comparing exercise only with exercise plus co-intervention studies. Analyses conducted with a random effects model. CI, confidence interval; df, degrees of freedom; M-H,Mantel-Haenszel.


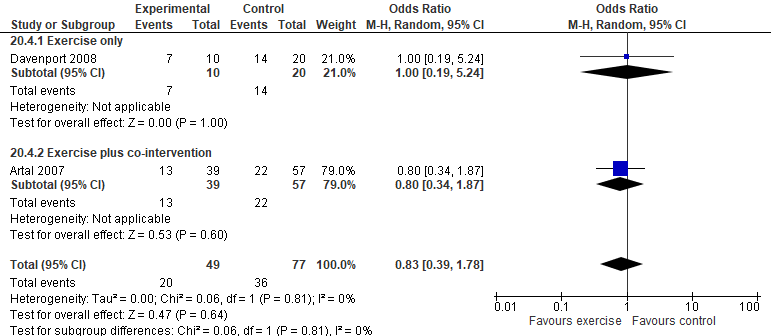
Online Supplement Figure 15: Non-randomized trials examining the impact of exercise only interventions on the number of women who required insulin for the management of GDM. Analyses conducted with a random effects model. CI, confidence interval; degrees of freedom; M-H, Mantel-Haenszel


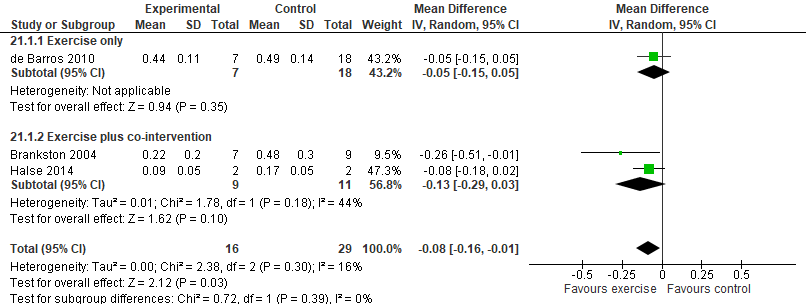


Online Supplement Figure 16. Randomized controlled trials examining the impact of exercise plus co-intervention studies on the amount of supplementary insulin required for the management of GDM. Analyses conducted with a random effects model. CI, confidence interval; df, degrees of freedom; IV, inverse variance; SD, standard deviation.


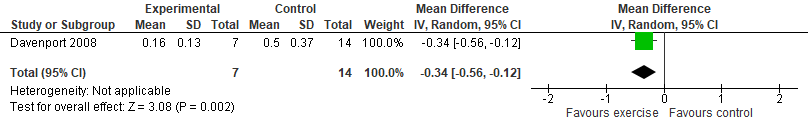


Online Supplement Figure 17. Non-randomized exercise only intervention examining the impact of exercise on the amount of supplementary insulin required for the management of GDM. Analyses conducted with a random effects model. CI, confidence interval; df, degrees of freedom; M-H, Mantel-Haenszel; SD, standard deviation.

Online supplement Figure 18: Linear regression of the mean change in circulating blood glucose concentrations during increasing duration of an acute bout of exercise. Black line, line of best fit; red line, mean difference of 0 shaded area, 95% CI. Circle size is related to the weight of the study in the regression.

Online supplement Figure 19: Linear regression of the mean change in circulating blood glucose concentrations following increasing duration of an acute bout of exercise. Black line, line of best fit; red line, mean difference of 0 shaded area, 95% CI. Circle size is related to the weight of the study in the regression.

**Search Strategies**

The following databases were searched on January 6th, 2017:

- Ovid MEDLINE(R) In-Process & Other Non-Indexed Citations, Ovid MEDLINE(R) Daily and Ovid MEDLINE(R)
- Ovid EMBASE
- Ovid All EBM [Evidence-Based Medicine] Reviews: Cochrane Database of Systematic and Cochrane Central Register of Controlled Trials
- Ovid PsycInfo 1806-Present
- EBSCO CINAHL Plus with Full-text, 1937-Present
- EBSCO Sport Discus with Full-text. 1975-Present
- EBSCO ERIC, 1966-Present
- EBSCO Child Development and Adolescent Studies, 1927-Present
- Scopus, 1960-Present
- Web of Science Core Collection (including Emerging Sources Citation Index) , 1900-Present
- Clinicaltrials.gov

*Maternal Outcomes Strategy*

MEDLINE

1. exp Exercise/ or Athletes/ or exp Exercise Movement Techniques/ or Physical Exertion/ or exp Exercise Therapy/ or exp Sports/ or Motor Activity/ or Sedentary Lifestyle/ or (exercise or physical* activ* or strenuous activit* or physical* inactiv* or sedentary or running or plyometric* or yoga or tai chi or weight training or resistance training or swim* or sport* or athlet* or walk or walking or mvpa or ltpa or stretching or aerobic capacity).ti,kf. or exercise.ab. /freq=2 or physical* activ*.ab. /freq=2 or (weight* adj2 lift*).ti,kf. or ((muscle or muscular or strength*) adj2 conditioning).ti,kf.

2. exp Pregnancy Complications/ or Pregnancy Outcome/ or exp Labor, Obstetric/ or exp Delivery, Obstetric/ or exp Extraction, Obstetrical/ or pregnan*.ti,hw,kf.

3. ((birth or pregnancy or childbirth) adj3 (outcome* or complication*)).mp.

4. (((spontaneous or induc* or onset or length) adj3 (labor or labour)) or c?esarean).mp.

5. (episiotom* or vaginal delivery or gestational diabetes or pre-eclampsia or preeclampsia or gestosis).mp.

6. (((normal or instrumental or assisted) adj2 (delivery or birth or childbirth)) or (forceps or ventouse or vacuum extraction)).mp.

7. ((mode of delivery or type of delivery) and (pregnan* or birth or childbirth or obstetric* or labor or labour)).mp.

8. ((tear* or ruptur* or hemorrhage*) adj2 (placent* or vagin* or membran* or periton*)).mp.

9. (miscarriage* or spontaneous abortion*).mp.

10. or/2-9

11. 1 and 10

12. Pregnancy/ or pregnan*.ti,hw,kf. or exp Pregnancy Trimesters/ or Peripartum Period/ or Postpartum Period/ or (antenatal or prenatal or perinatal or postnatal or prepartum or antepartum or postpartum or pre partum or ante partum or post partum or puerper* or primigravid* or primiparous or multiparous or nulliparous or multigravid* or trimester* or obstetric*).ti,kf.

13. 1 and 12

14. ((pregnan* or antenatal or prenatal or perinatal or postnatal or prepartum or antepartum or postpartum or pre partum or ante partum or post partum or puerper*) adj5 (exercise or physical* activ* or strenuous activit* or physical inactiv* or sedentary or running or plyometric* or yoga or tai chi or weight training or resistance training or (weight* adj2 lift*) or swim* or sport* or athlet* or walk or walking or ((muscle or muscular or strength*) adj2 conditioning))).ab.

15. 13 or 14

16. exp Insulins/ or diabetes mellitus/ or exp diabetes mellitus, type 1/ or exp diabetes mellitus, type 2/ or diabetes, gestational/ or prediabetic state/ or hemoglobin a, glycosylated/ or (insulin or glucose or glyc?emic control or blood sugar or diabet* or prediabet* or hba1c or glycosylated h?emoglobin or hyperglyc?emi* or hypoglyc?emi* or (weight adj3 (gain* or change* or loss or lose or retention)) or bmi or body mass index or body composition or skinfold thickness or ((hip or waist) adj2 ratio) or ((waist or abdominal) adj2 circumference) or overweight or obes* or adipos* or underweight or normal weight or healthy weight or hypertension or hypotension or fainting or syncope or lightheaded* or light headed* or dizziness or blood pressure or tox?emi* or eph complex or proteinuria or edema or hemodynamic* or haemodynamic* or systolic or diastolic or cardiovascular or cardiometabolic or cardio-metabolic or metabolic or heart or cardio* or cardiac or lipid* or placental growth factor* or triglyceride* or ldl or hdl or lipoprotein or cholesterol).mp.

17. dehydration/ or exp Cardiovascular Diseases/ or (dehydrat* or heart disease* or cardiovascular disease*).mp.

18. adaptation, physiological/ or body temperature regulation/

19. Physical Fitness/ or exp Physical Endurance/ or me.fs. or (safe* or harm* or risk* or fitness or aerobic capacity or oxygen consumption or vo2 max or vo2max or vo2 peak or vo2peak or frequency or intensity or duration or dose response or fitt or zone or (type* adj2 exercise)).mp.

20. exp Chronic disease/ or exp Osteoporosis/ or exp Urinary Incontinence/ or (chronic disease* or chronic illness* or osteoporosis or incontinen*).mp.

21. exp Back Pain/ or Pelvic Pain/ or Muscle Cramp/ or (Pain/ and exp Hip Joint/) or ((hip or back or pelvic or pelvis) adj3 (pain or discomfort or ache)).mp. or cramp*.mp.

22. Mental Health/ or exp Mental Disorders/ or Body Image/ or Self Concept/ or (mental health or mental disorder* or mental illness* or mental disease* or depression or depressive or mood or anxiety or well being or wellbeing or wellness or body image or self perception).mp.

23. (postur* or supine or valsalva or diastasis recti or rectus abdominis or inter rectus distance or interrectus distance).mp.

24. Fatigue/ or (fatigue or exhaustion or injur* or trauma).mp.

25. or/16-24

26. 15 and 25

27. 11 or 26

28. limit 27 to medline

29. animals/ not (animals/ and humans/)

30. 28 not 29

31. 27 not 28

32. ((rat or rats or mouse or mice or cow or cows or bovine or sheep or ewe*) not ((rat or rats or mouse or mice or cow or cows or bovine or sheep or ewe*) and (human* or women))).ti,ab,kf.

33. 31 not 32

34. 30 or 33

35. remove duplicates from 34

EMBASE

1. exp *exercise/ or *athlete/ or exp *kinesiotherapy/ or exp *sport/ or exp *physical activity/ or *sedentary lifestyle/ or (exercise or physical* activ* or physical* inactiv* or sedentary or running or plyometric* or yoga or tai chi or weight training or resistance training or swim* or sport* or athlet* or walk or walking or mvpa or ltpa or stretching or aerobic capacity).ti,kw. or exercise.ab. /freq=2 or physical* activ*.ab. /freq=2 or (weight* adj2 lift*).ti,kw. or ((muscle or muscular or strength*) adj2 conditioning).ti,kw.

2. exp pregnancy complication/ or pregnancy outcome/ or exp labor/ or exp delivery/ or pregnan*.ti,kw.

3. ((birth or pregnancy or childbirth) adj3 (outcome* or complication*)).mp.

4. (((spontaneous or induc* or onset or length) adj3 (labor or labour)) or c?esarean).mp.

5. (episiotom* or vaginal delivery or gestational diabetes or pre-eclampsia or preeclampsia or gestosis).mp.

6. (((normal or instrumental or assisted) adj2 (delivery or birth or childbirth)) or (forceps or ventouse or vacuum extraction)).mp.

7. ((mode of delivery or type of delivery) and (pregnan* or birth or childbirth or obstetric* or labor or labour)).mp.

8. ((tear* or ruptur* or hemorrhage*) adj2 (placent* or vagin* or membran* or periton*)).mp.

9. (miscarriage* or spontaneous abortion*).mp.

10. or/2-9

11. 1 and 10

12. Pregnancy/ or pregnan*.ti,hw,kw. or exp Pregnancy Trimesters/ or Peripartum Period/ or Postpartum Period/ or (antenatal or prenatal or perinatal or postnatal or prepartum or antepartum or postpartum or pre partum or ante partum or post partum or puerper* or primigravid* or primiparous or multiparous or nulliparous or multigravid* or trimester* or obstetric*).ti,kw.

13. 1 and 12

14. ((pregnan* or maternal or antenatal or prenatal or perinatal or postnatal or prepartum or antepartum or postpartum or pre partum or ante partum or post partum or puerper*) adj5 (exercise or physical* activ* or strenuous activit* or physical* inactiv* or sedentary or running or plyometric* or yoga or tai chi or weight training or resistance training or (weight* adj2 lift*) or swim* or sport* or athlet* or walk or walking or mvpa or ltpa or stretching or aerobic capacity or fitness or ((muscle or muscular or strength*) adj2 conditioning))).ab.

15. 13 or 14

16. exp insulin/ or exp diabetes mellitus/ or glycosylated hemoglobin/ or (insulin or glucose or glyc?emic control or blood sugar or diabet* or prediabet* or hba1c or glycosylated h?emoglobin or hyperglyc?emi* or hypoglyc?emi* or (weight adj3 (gain* or change* or loss or lose or retention)) or bmi or body mass index or body composition or skinfold thickness or ((hip or waist) adj2 ratio) or ((waist or abdominal) adj2 circumference) or overweight or obes* or adipos* or underweight or normal weight or healthy weight or hypertension or hypotension or fainting or syncope or lightheaded* or light headed* or dizziness or blood pressure or tox?emi* or eph complex or proteinuria or edema or hemodynamic* or haemodynamic* or systolic or diastolic or cardiovascular or cardiometabolic or cardio-metabolic or metabolic or heart or cardio* or cardiac or lipid* or placental growth factor* or triglyceride* or ldl or hdl or lipoprotein or cholesterol).mp.

17. dehydration/ or exp cardiovascular disease/ or (dehydrat* or heart disease* or cardiovascular disease*).mp.

18. adaptation/ or exp thermoregulation/ or fitness/ or endurance/ or (safe* or harm* or risk* or fitness or aerobic capacity or oxygen consumption or vo2 max or vo2max or vo2 peak or vo2peak or frequency or intensity or duration or dose response or fitt or zone or (type* adj2 exercise)).mp.

19. exp backache/ or exp pelvic pain/ or hip pain/ or muscle cramp/ or heat cramp/ or leg cramp/ or ((hip or back or pelvic or pelvis) adj3 (pain or discomfort or ache)).mp. or cramp*.mp.

20. mental health/ or psychological well being/ or exp mental disease/ or body image/ or self concept/ or (mental health or mental disorder* or mental illness* or mental disease* or depression or depressive or mood or anxiety or well being or wellbeing or wellness or body image or self perception).mp.

21. (postur* or supine or valsalva or diastasis recti or rectus abdominis or inter rectus distance or interrectus distance).mp.

22. fatigue/ or exhaustion/ or (fatigue or exhaustion or injur* or trauma or blood loss).mp.

23. chronic disease/ or exp osteoporosis/ or exp urine incontinence/ or (chronic disease* or chronic illness* or osteoporosis or incontinen*).mp.

24. or/16-23

25. 15 and 24

26. 11 or 25

27. exp animal/ not (exp animal/ and human/)

28. 26 not 27

29. remove duplicates from 28

Cochrane Library

#1 [mh Exercise] or [mh "Exercise Movement Techniques"] or [mh "Physical Exertion"] or [mh "Exercise Therapy"] or [mh "Motor Activity"] or [mh "Sedentary Lifestyle"] or (exercise or "physical* activ*" or "strenuous activit* " or " physical* inactiv* " or sedentary or running or plyometric* or yoga or " tai chi" or weight training or resistance training or swim* or sport* or athlet* or walk or walking or mvpa or ltpa or stretching or aerobic capacity or physical* active*):ti,ab,kw (weight* near/2 lift*):ti,ab,kw or ((muscle or muscular or strength*) near/2 conditioning):ti,ab,kw

#2 [mh "Pregnancy Complications"] or [mh "Pregnancy Outcome"] or [mh "Labor, Obstetric"] or [mh "Delivery, Obstetric"] or [mh "Extraction, Obstetrical"] or (pregnan*) .ti,ab,kw

#3 ((birth or pregnancy or childbirth) near/3 (outcome* or complication*)):ti,ab,kw

#4 (((spontaneous or induc* or onset or length) near/3 (labor or labour)) or (cesarean or caesarean)):ti,ab,kw

#5 (episiotom* or vaginal delivery or gestational diabetes or pre-eclampsia or preeclampsia or gestosis):ti,ab,kw

#6 (((normal or instrumental or assisted) near/2 (delivery or birth or childbirth)) or (forceps or ventouse or vacuum extraction)):ti,ab,kw

#7 ((mode of delivery or type of delivery) and (pregnan* or birth or childbirth or obstetric* or labor or labour)):ti,ab,kw

#8 ((tear* or ruptur* or hemorrhage*) near/2 (placent* or vagin* or membran* or periton*)):ti,ab,kw

#9 (miscarriage* or spontaneous abortion*):ti,ab,kw

#10 #2 or #3 or #4 or #5 or #6 or #7 or #8 or #9

#11 #1 AND #10

#12 [mh Pregnancy] or (pregnan*):ti,ab,kw or [mh "Pregnancy Trimesters"] or [mh "Peripartum Period"] or [mh "Postpartum Period"] or (antenatal or prenatal or perinatal or postnatal or prepartum or antepartum or postpartum or pre partum or ante partum or post partum or puerper* or primigravid* or primiparous or multiparous or nulliparous or multigravid* or trimester* or obstetric*):ti,ab,kw

#13 #1 AND #12

#14 ((pregnan* or antenatal or prenatal or perinatal or postnatal or prepartum or antepartum or postpartum or pre partum or ante partum or post partum or puerper*) near/5 (exercise or physical* activ* or strenuous activit* or physical inactiv* or sedentary or running or plyometric* or yoga or tai chi or weight training or resistance training or (weight* near/2 lift*) or swim* or sport* or athlet* or walk or walking or ((muscle or muscular or strength*) near/2 conditioning))) .ab.

#15 #13 or #14

#16 [mh Insulins] or [mh "diabetes mellitus"] or [mh "diabetes, gestational"] or [mh "prediabetic state"] or [mh "hemoglobin a, glycosylated"] or (insulin or glucose or "glycemic control" or "blood sugar" or diabet* or prediabet* or hba1c or "glycosylated hemoglobin" or "glycosylated haemoglobin" or hyperglycemi* or hypoglycemi* or hyperglycaemi* or hypoglycaemi* or (weight near/3 (gain* or change* or loss or lose or retention)) or bmi or (weight near/3 (gain* or change* or loss or lose or retention)) or bmi or "body mass index" or "body composition" or "skinfold thickness" or ((hip or waist) near/2 ratio) or ((waist or abdominal) near/2 circumference) or overweight or obes* or adipos* or underweight or "normal weight" or "healthy weight" or hypertension or hypotension or fainting or syncope or lightheaded* or "light headed*" or dizziness or "blood pressure" or toxemi* or "eph complex" or proteinuria or edema or hemodynamic* or haemodynamic* or systolic or diastolic or cardiovascular or cardiometabolic or "cardio-metabolic" or metabolic or heart or cardio* or cardiac or lipid* or "placental growth factor*" or triglyceride* or ldl or hdl or lipoprotein or cholesterol):ti,ab,kw

#17 [mh dehydration] or [mh "Cardiovascular Diseases"] or (dehydrat* or heart disease* or "cardiovascular disease*"):ti,ab,kw

#18 [mh "adaptation, physiological"] or [mh "body temperature regulation"]

#19 [mh "Physical Fitness"] or [mh "Physical Endurance"] or (safe* or harm* or risk* or fitness or "aerobic capacity" or "oxygen consumption" or "vo2 max" or vo2max or "vo2 peak" or vo2peak or frequency or intensity or duration or "dose response" or fitt or zone or (type* near/2 exercise)):ti,ab,kw

#20 [mh "Chronic disease"] or [mh Osteoporosis] or [mh "Urinary Incontinence"] or ("chronic disease*" or "chronic illness*" or osteoporosis or incontinen*):ti,ab,kw

#21 [mh "Back Pain"] or [mh "Pelvic Pain"] or [mh "Muscle Cramp"] or cramp*:ti,ab,kw or ([mh Pain] and ([mh "Hip Joint"] or ((hip or back or pelvic or pelvis) near/3 (pain or discomfort or ache))):ti,ab,kw)

#22 [mh "Mental Health"] or [mh "Mental Disorders"] or [mh "Body Image"] or [mh "Self Concept"] or ("mental health" or "mental disorder*" or "mental illness*" or "mental disease*" or depression or depressive or mood or anxiety or "well being" or wellbeing or wellness or "body image" or "self perception"):ti,ab,kw

#23 [mh Fatigue] or (fatigue or exhaustion or injur* or trauma):ti,ab,kw

#24 (postur* or supine or valsalva or "diastasis recti" or "rectus abdominis" or "inter rectus distance" or "interrectus distance"):ti,ab,kw

#25 #16 or #17 or #18 or #19 or #20 or #21 or #22 or #23 or #24

#26 #15 and #25

#27 #11 or #26

PsycInfo

1. physical activity/ or exp exercise/ or activity level/ or athletes/ or exp sports/ or ((exercise or physical* activ* or strenuous activit* or physical* inactiv* or sedentary or running or plyometric* or yoga or tai chi or weight training or resistance training or swim* or sport* or athlet* or walk or walking or mvpa or ltpa or stretching or aerobic capacity).ti,ab,id. or ((weight* adj2 lift*) or ((muscle or muscular or strength*) adj2 conditioning))).ti,ab,id.

2. obstetrical complications/ or pregnancy outcomes/ or spontaneous abortion/ or "labor (childbirth)"/ or birth/

3. (pregnan* or ((birth or pregnancy or childbirth) adj3 (outcome* or complication*))).mp.

4. (((spontaneous or induc* or onset or length) adj3 (labor or labour)) or c?esarean).mp.

5. (episiotom* or vaginal delivery or gestational diabetes or pre-eclampsia or preeclampsia or gestosis).mp.

6. (((normal or instrumental or assisted) adj2 (delivery or birth or childbirth)) or (forceps or ventouse or vacuum extraction)).mp.

7. ((mode of delivery or type of delivery) and (pregnan* or birth or childbirth or obstetric* or labor or labour)).mp.

8. ((tear* or ruptur* or hemorrhage*) adj2 (placent* or vagin* or membran* or periton*)).mp.

9. (miscarriage* or spontaneous abortion*).mp.

10. or/2-9

11. 1 and 10

12. exp pregnancy/ or pregnan*.ti,hw,id. or (antenatal or prenatal or perinatal or postnatal or prepartum or antepartum or postpartum or primigravid* or primiparous or multiparous or nulliparous or multigravid* or trimester* or obstetric*).ti,id.

13. 1 and 12

14. ((pregnan* or antenatal or prenatal or perinatal or postnatal or prepartum or antepartum or postpartum or pre partum or ante partum or post partum or puerper*) adj5 (exercise or physical* activ* or strenuous activit* or physical inactiv* or sedentary or running or plyometric* or yoga or tai chi or weight training or resistance training or (weight* adj2 lift*) or swim* or sport* or athlet* or walk or walking or ((muscle or muscular or strength*) adj2 conditioning))).ab.

15. 13 or 14

16. insulin/ or diabetes/ or diabetes mellitus/ or (insulin or glucose or glyc?emic control or blood sugar or diabet* or prediabet* or hba1c or glycosylated h?emoglobin or hyperglyc?emi* or hypoglyc?emi* or (weight adj3 (gain* or change* or loss or lose or retention)) or bmi or body mass index or body composition or skinfold thickness or ((hip or waist) adj2 ratio) or ((waist or abdominal) adj2 circumference) or overweight or obes* or adipos* or underweight or normal weight or healthy weight or hypertension or hypotension or fainting or syncope or lightheaded* or light headed* or dizziness or blood pressure or tox?emi* or eph complex or proteinuria or edema or hemodynamic* or haemodynamic* or systolic or diastolic or cardiovascular or cardiometabolic or cardio-metabolic or metabolic or heart or cardio* or cardiac or lipid* or placental growth factor* or triglyceride* or ldl or hdl or lipoprotein or cholesterol).mp.

17. dehydration/ or exp Cardiovascular Disorders/ or (dehydrat* or heart disease* or cardiovascular disease*).mp.

18. "thermoregulation (body)"/ or physical fitness/ or physical endurance/ or (safe* or harm* or risk* or fitness or aerobic capacity or oxygen consumption or vo2 max or vo2max or vo2 peak or vo2peak or frequency or intensity or duration or dose response or fitt or zone or (type* adj2 exercise)).mp.

19. back pain/ or ((hip or back or pelvic or pelvis) adj3 (pain or discomfort or ache)).mp. or cramp*.mp.

20. mental health/ or exp Mental Disorders/ or exp body image/ or self concept/ or (mental health or mental disorder* or mental illness* or mental disease* or depression or depressive or mood or anxiety or well being or wellbeing or wellness or body image or self perception).mp.

21. (postur* or supine or valsalva or diastasis recti or rectus abdominis or inter rectus distance or interrectus distance).mp.

22. fatigue/ or (fatigue or exhaustion or injur* or trauma).mp.

23. Physical Fitness/ or exp Physical Endurance/ or (safe* or harm* or risk* or fitness or aerobic capacity or oxygen consumption or vo2 max or vo2max or vo2 peak or vo2peak or frequency or intensity or duration or dose response or fitt or zone or (type* adj2 exercise)).mp.

24. chronic illness/ or osteoporosis/ or urinary incontinence/ or (chronic disease* or chronic illness* or osteoporosis or incontinen*).mp.

25. or/16-24

26. 15 and 25

27. 11 or 26

28. first posting.ps.

29. (27 not first posting).ps.

30. limit 29 to human

31. 27 and 28

32. 30 or 31

CINAHL

S1 ( (MH "Exercise+") OR (MH "Athletes+") OR (MH "Therapeutic Exercise+") OR (MH "Physical Fitness+") OR (MH "Physical Activity") OR (MH "Physical Endurance+") OR (MH "Exertion+") OR (MH "Sports+") OR (MH "Life Style, Sedentary") OR (MH "Yoga+") OR (MH "Tai Chi") ) OR TI ( exercise or "physical* activ*" or "strenuous activit*" or "physical* inactiv*" or sedentary or running or plyometric* or yoga or "tai chi" or "weight training" or "resistance training" or swim* or sport* or athlet* or walk or walking or mvpa or ltpa or stretching or "aerobic capacity" or fitness or weight* n2 lift* or (muscle or muscular or strength*) n2 conditioning )

S2 ((MH "Pregnancy Complications+") OR (MH "Pregnancy Outcomes") OR (MH "Pregnancy Trimesters+") OR (MH "Labor+") OR (MH "Delivery, Obstetric+") OR (MH "Surgery, Obstetrical+")) OR TI pregnan* OR MW pregnan*

S3 (birth or pregnancy or childbirth) n3 (outcome* or complication*) or (spontaneous or induc* or onset or length) n3 (labor or labour) or cesarean or caesarean or episiotom* or "vaginal delivery" or "gestational diabetes" or "pre-eclampsia" or preeclampsia or gestosis OR (normal or instrumental or assisted) n2 (delivery or birth or childbirth) or forceps or ventouse or "vacuum extraction" or miscarriage* or "spontaneous abortion*" OR ( ("mode of delivery" or "type of delivery") and (pregnan* or birth or childbirth or obstetric* or labor or labour) ) OR (tear* or ruptur* or hemorrhage*) n2 (placent* or vagin* or membran* or periton*)

S4 S2 OR S3

S5 S1 AND S4

S6 ( (MH "Pregnancy") OR (MH "Pregnancy Trimesters+") ) OR TI ( pregnan* or trimester* or antenatal or prenatal or perinatal or postnatal or prepartum or antepartum or postpartum or "pre partum" or "ante partum" or "post partum" or puerper* or primigravid* or primiparous or multiparous or nulliparous or multigravid* ) OR MW ( antenatal or prenatal or perinatal or postnatal or prepartum or antepartum or postpartum or primigravid* or primiparous or multiparous or nulliparous or multigravid* or trimester* or obstetric* )

S7 S1 and S6

S8 (pregnan* or trimester* or antenatal or prenatal or perinatal or postnatal or prepartum or antepartum or postpartum or "pre partum" or "ante partum" or "post partum" or puerper*) n5 (exercise or "physical* activ*" or "strenuous activit*" or "physical* inactiv*" or sedentary or running or plyometric* or yoga or "tai chi" or "weight training" or "resistance training" or (weight* n2 lift*) or swim* or sport* or athlet* or walk or walking or (muscle or muscular or strength*) n2 conditioning)

S9 S7 or S8

S10 ((MH "Insulin+") OR (MH "Diabetes Mellitus+") OR (MH "Prediabetic State") OR (MH "Hemoglobin A, Glycosylated") ) OR ( insulin or glucose or "glycemic control" or "glycaemic control" or "blood sugar" or diabet* or prediabet* or hba1c or "glycosylated hemoglobin" or "glycosylated haemoglobin" or hyperglycemi* or hyperglycaemi* or hypoglycemi* or hypoglycaemi* or weight n3 (gain* or change* or loss or lose or retention) or bmi or "body mass index" or "body composition" or "skinfold thickness" or (hip or waist) n2 ratio or (waist or abdominal) n2 circumference or overweight or obes* or adipos* or underweight or "normal weight" or "healthy weight" or hypertension or hypotension or fainting or syncope or lightheaded* or "light headed*" or dizziness or "blood pressure" or toxemi* or toxaemi* or "eph complex" or proteinuria or edema or hemodynamic* or haemodynamic* or systolic or diastolic or cardiovascular or cardiometabolic or "cardio-metabolic" or metabolic or heart or cardio* or cardiac or lipid* or "placental growth factor*" or triglyceride* or ldl or hdl or lipoprotein or cholesterol )

S11 ((MH "Dehydration") OR (MH "Cardiovascular Diseases+") ) OR ( dehydrat* or heart disease* or "cardiovascular disease*" )

S12 ((MH "Adaptation, Physiological") OR (MH "Body Temperature Regulation+") OR (MH "Physical Fitness+") OR (MH "Physical Endurance+") ) OR MW metabolism OR ( safe* or harm* or risk* or fitness or "aerobic capacity" or "oxygen consumption" or "vo2 max" or vo2max or "vo2 peak" or vo2peak or frequency or intensity or duration or "dose response" or fitt or zone or type* n2 exercise )

S13 ((MH "Chronic Disease") OR (MH "Urinary Incontinence+") OR (MH "Osteoporosis+") ) OR ( "chronic disease*" or "chronic illness*" or osteoporosis or incontinen* )

S14 ((MH "Back Pain+") OR (MH "Pelvic Pain+") OR (MH "Muscle Cramp") ) OR ( cramp* or (hip or back or pelvic or pelvis) n3 (pain or discomfort or ache) )

S15 ((MH "Mental Health") OR (MH "Mental Disorders+") OR (MH "Psychological Well-Being") OR (MH "Body Image") OR (MH "Self Concept")) OR ( "mental health" or "mental disorder*" or "mental illness*" or "mental disease*" or depression or depressive or mood or anxiety or "well being" or wellbeing or wellness or "body image" or "self perception" )

S16 (MH "Fatigue") or fatigue or exhaustion or injur* or trauma

S17 postur* or supine or valsalva or "diastasis recti" or "rectus abdominis" or "inter rectus distance" or "interrectus distance"

S18 S10 OR S11 OR S12 OR S13 OR S14 OR S15 OR S16 OR S17

S19 S9 AND S18

S20 S5 OR S19

Sport Discus

S1 (birth or pregnancy or childbirth) n3 (outcome* or complication*) or (spontaneous or induc* or onset or length) n3 (labor or labour) or cesarean or caesarean or episiotom* or "vaginal delivery" or "gestational diabetes" or "pre-eclampsia" or preeclampsia or gestosis) OR (normal or instrumental or assisted) n2 (delivery or birth or childbirth) or forceps or ventouse or "vacuum extraction" or miscarriage* or "spontaneous abortion*" OR ( ("mode of delivery" or "type of delivery") and (pregnan* or birth or childbirth or obstetric* or labor or labour) ) OR (tear* or ruptur* or hemorrhage*) n2 (placent* or vagin* or membran* or periton*) OR antenatal or prenatal or perinatal or postnatal or prepartum or antepartum or postpartum or "pre partum" or "ante partum" or "post partum" or puerper* or primigravid* or primiparous or multiparous or nulliparous or multigravid* or pregnan* or trimester* or obstetric*

S2 exercise or "physical* activ*" or "strenuous activit*" or "physical* inactiv*" or sedentary or running or plyometric* or yoga or "tai chi" or "weight training" or "resistance training" or swim* or sport* or athlet* or walk or walking or mvpa or ltpa or stretching or "aerobic capacity" or fitness or weight* n2 lift* or (muscle or muscular or strength*) n2 conditioning

S3 S1 and S2

[Limited to Academic Journal, Dissertation, Report]

Child Development & Adolescent Studies

exercise or "physical* activ*" or "strenuous activit*" or "physical* inactiv*" or sedentary or running or plyometric* or yoga or "tai chi" or "weight training" or "resistance training" or swim* or sport* or athlet* or walk or walking or mvpa or ltpa or stretching or "aerobic capacity" or fitness or weight* n2 lift* or (muscle or muscular or strength*) n2 conditioning

AND

pregnan* or antenatal or prenatal or perinatal or postnatal or prepartum or antepartum or postpartum or primigravid* or primiparous or multiparous or nulliparous or multigravid* or or trimester* or obstetric* or ( (birth or pregnancy or childbirth) n3 (outcome* or complication*) or (spontaneous or induc* or onset or length) n3 (labor or labour) or cesarean or caesarean or episiotom* or "vaginal delivery" or "gestational diabetes" or "pre-eclampsia" or preeclampsia or gestosis OR (normal or instrumental or assisted) n2 (delivery or birth or childbirth) or forceps or ventouse or "vacuum extraction" or miscarriage* or "spontaneous abortion*" OR ( ("mode of delivery" or "type of delivery") and (pregnan* or birth or childbirth or obstetric* or labor or labour) ) OR ( (tear* or ruptur* or hemorrhage*) n2 (placent* or vagin* or membran* or periton*)

[Limitedto Academic Journal]

ERIC

exercise or "physical* activ*" or "strenuous activit*" or "physical* inactiv*" or sedentary or running or plyometric* or yoga or "tai chi" or "weight training" or "resistance training" or swim* or sport* or athlet* or walk or walking or mvpa or ltpa or stretching or "aerobic capacity" or fitness or weight* n2 lift* or (muscle or muscular or strength*) n2 conditioning

AND

pregnan* or antenatal or prenatal or perinatal or postnatal or prepartum or antepartum or postpartum or primigravid* or primiparous or multiparous or nulliparous or multigravid* or or trimester* or obstetric* or ( (birth or pregnancy or childbirth) n3 (outcome* or complication*) or (spontaneous or induc* or onset or length) n3 (labor or labour) or cesarean or caesarean or episiotom* or "vaginal delivery" or "gestational diabetes" or "pre-eclampsia" or preeclampsia or gestosis OR (normal or instrumental or assisted) n2 (delivery or birth or childbirth) or forceps or ventouse or "vacuum extraction" or miscarriage* or "spontaneous abortion*" OR ( ("mode of delivery" or "type of delivery") and (pregnan* or birth or childbirth or obstetric* or labor or labour) ) OR ( (tear* or ruptur* or hemorrhage*) n2 (placent* or vagin* or membran* or periton*)

[Limited to Academic Journals]

Scopus

(((TITLE-ABS-KEY(((birth or pregnancy or childbirth) w/3 (outcome* or complication*)) or ((spontaneous or induc* or onset or length) w/3 (labor or labour)) or cesarean or caesarean or episiotom* or "vaginal delivery" or "gestational diabetes" or "pre-eclampsia" or preeclampsia or gestosis OR ( (normal or instrumental or assisted) w/2 (delivery or birth or childbirth) or forceps or ventouse or "vacuum extraction" or miscarriage* or "spontaneous abortion*" ) OR (("mode of delivery" or "type of delivery") and (pregnan* or birth or childbirth or obstetric* or labor or labour) ) OR ( (tear* or ruptur* or hemorrhage*) w/2 (placent* or vagin* or membran* or periton*)) OR antenatal or prenatal or perinatal or postnatal or prepartum or antepartum or postpartum or "pre partum" or "ante partum" or "post partum" or puerper* or primigravid* or primiparous or multiparous or nulliparous or multigravid* or pregnan* or obstetric* or trimester*))) AND (TITLE ( exercise* OR "physical* activ*" OR "strenuous activit*" OR "physical inactiv*" OR sedentary OR running OR plyometric* OR yoga OR "tai chi" OR "weight training" OR "resistance training" OR swim* OR sport* OR athlet* OR walk OR walking OR "muscle strengthening" OR "muscle conditioning" OR "muscular conditioning" OR "weight lifting" OR "lifting weight*" ))) OR ((TITLE-ABS-KEY((insulin or glucose or "glycemic control" or "glycaemic control" or "blood sugar" or diabet* or prediabet* or hba1c or "glycosylated hemoglobin" or "glycosylated haemoglobin" or hyperglycemi* or hyperglycaemi* or hypoglycemi* or hypoglycaemi* or (weight w/3 (gain* or change* or loss or lose or retention)) or bmi or "body mass index" or "body composition" or "skinfold thickness" or ((hip or waist) w/2 ratio) or ((waist or abdominal) w/2 circumference) or overweight or obes* or adipos* or underweight or "normal weight" or "healthy weight" or hypertension or hypotension or fainting or syncope or lightheaded* or "light headed*" or dizziness or "blood pressure" or toxemi* or toxaemi* or "eph complex" or proteinuria or edema or hemodynamic* or haemodynamic* or systolic or diastolic or cardiovascular or cardiometabolic or "cardio-metabolic" or metabolic or heart or cardio* or cardiac or lipid* or "placental growth factor*" or triglyceride* or ldl or hdl or lipoprotein or cholesterol or dehydrat* or heart disease* or "cardiovascular disease*" or safe* or harm* or risk* or fitness or "aerobic capacity" or "oxygen consumption" or "vo2 max" or vo2max or "vo2 peak" or vo2peak or frequency or intensity or duration or "dose response" or fitt or zone or (type* w/2 exercise) or "chronic disease*" or "chronic illness*" or osteoporosis or incontinen* or cramp* or ((hip or back or pelvic or pelvis) w/3 (pain or discomfort or ache)) or "mental health" or "mental disorder*" or "mental illness*" or "mental disease*" or depression or depressive or mood or anxiety or "well being" or wellbeing or wellness or fatigue or exhaustion or injur* or trauma or postur* or supine or valsalva or "diastasis recti" or "rectus abdominis" or "inter rectus distance" or "interrectus distance"))) AND (((TITLE(exercise* or "physical* activ*" or "strenuous activit*" or "physical inactiv*" or sedentary or running or plyometric* or yoga or "tai chi" or "weight training" or "resistance training" or swim* or sport* or athlet* or walk or walking OR "muscle strengthening" or "muscle conditioning" or "muscular conditioning" or "weight lifting" or "lifting weight*") AND TITLE-ABS-KEY(pregnan* or antenatal or prenatal or perinatal or postnatal or prepartum or antepartum or postpartum or "pre partum" or "ante partum" or "post partum" or puerper*)) AND (TITLE-ABS-KEY ( pregnan* OR antenatal OR prenatal OR perinatal OR postnatal OR prepartum OR antepartum OR postpartum OR "pre partum" OR "ante partum" OR "post partum" OR puerper* ))))) AND NOT (TITLE(rat or rats or mouse or mice or cow or cows or bovine or sheep or ewe*))

Web of Science Core Collection (including Emerging Science Citation Index)

#1 TI=(exercise* or "physical* activ*" or "strenuous activit*" or "physical inactiv*" or sedentary or running or plyometric* or yoga or "tai chi" or "weight training" or "resistance training" or swim* or sport* or athlet* or walk or walking or (muscle* or muscular or strength) near/2 conditioning or weight* near/2 lift*)

#2 TS=(pregnan* or antenatal or prenatal or perinatal or postnatal or prepartum or antepartum or postpartum or "pre partum" or "ante partum" or "post partum" or puerper* or primigravid* or primiparous or multiparous or nulliparous or multigravid* or trimester* or obstetric*)

#3 #1 AND #2

#4 TS=(insulin or glucose or "glycemic control" or "glycaemic control" or "blood sugar" or diabet* or prediabet* or hba1c or "glycosylated hemoglobin" or "glycosylated haemoglobin" or hyperglycemi* or hyperglycaemi* or hypoglycemi* or hypoglycaemi* or (weight near/3 (gain* or change* or loss or lose or retention)) or bmi or "body mass index" or "body composition" or "skinfold thickness" or ((hip or waist) near/2 ratio) or ((waist or abdominal) near2 circumference) or overweight or obes* or adipos* or underweight or "normal weight" or "healthy weight" or hypertension or hypotension or fainting or syncope or lightheaded* or "light headed*" or dizziness or "blood pressure" or toxemi* or toxaemi* or "eph complex" or proteinuria or edema or hemodynamic* or haemodynamic* or systolic or diastolic or cardiovascular or cardiometabolic or "cardio-metabolic" or metabolic or heart or cardio* or cardiac or lipid* or "placental growth factor*" or triglyceride* or ldl or hdl or lipoprotein or cholesterol or dehydrat* or heart disease* or "cardiovascular disease*" or safe* or harm* or risk* or fitness or "aerobic capacity" or "oxygen consumption" or "vo2 max" or vo2max or "vo2 peak" or vo2peak or frequency or intensity or duration or "dose response" or fitt or zone or (type* near2 exercise) or "chronic disease*" or "chronic illness*" or osteoporosis or incontinen* or cramp* or ((hip or back or pelvic or pelvis) near/3 (pain or discomfort or ache)) or "mental health" or "mental disorder*" or "mental illness*" or "mental disease*" or depression or depressive or mood or anxiety or "well being" or wellbeing or wellness or fatigue or exhaustion or injur* or traumaor postur* or supine or valsalva or "diastasis recti" or "rectus abdominis" or "inter rectus distance" or "interrectus distance")

#5 #3 AND #4

#6 TS=((birth or pregnancy or childbirth) near/3 (outcome* or complication*) or (spontaneous or induc* or onset or length) near/3 (labor or labour) or cesarean or caesarean or episiotom* or "vaginal delivery" or "gestational diabetes" or "pre-eclampsia" or preeclampsia or gestosis OR (normal or instrumental or assisted) near/2 (delivery or birth or childbirth) or forceps or ventouse or "vacuum extraction" or miscarriage* or "spontaneous abortion*" OR ("mode of delivery" or "type of delivery") and (pregnan* or birth or childbirth or obstetric* or labor or labour) OR (tear* or ruptur* or hemorrhage*) near/2 (placent* or vagin* or membran* or periton*))

#7 #1 AND #6

#8 #5 OR #7

#9 TS=(rat or rats or mouse or mice or cow or cows or bovine or sheep or ewe*)

#10 #9 NOT #8

Clinicatrials.gov

(exercise OR "physical activity" ) AND (antenatal OR prenatal OR perinatal OR postnatal OR prepartum OR antepartum OR postpartum OR "pre partum" OR fetus OR foetus OR fetal OR foetal)

(exercise OR "physical activity" ) AND ("ante partum" OR "post partum" OR puerper* OR primigravida OR primiparous OR multiparous OR nulliparous OR multigravida OR trimester OR trimesters OR obstetric)

*Fetal Outcomes Strategies*

MEDLINE

1. exp Exercise/ or Athletes/ or exp Exercise Movement Techniques/ or exp Exercise Therapy/ or exp Sports/ or Motor Activity/ or Physical Exertion/ or Sedentary Lifestyle/ or (exercise or physical* activ* or physical* inactiv* or sedentary or running or plyometric* or yoga or tai chi or weight training or resistance training or swim* or sport* or athlet* or walk or walking or mvpa or ltpa or stretching or aerobic capacity or fitness).ti,kf. or exercise.ab. /freq=2 or (weight* adj2 lift*).ti,kf. or ((muscle or muscular or strength*) adj2 conditioning).ti,kf.

2. Pregnancy/ or exp Pregnancy Complications/ or Pregnancy Outcome/ or exp Pregnancy Trimesters/ or Peripartum Period/ or Postpartum Period/ or pregnan*.hw. or (pregnan* or antenatal or prenatal or perinatal or postnatal or prepartum or antepartum or postpartum or pre partum or ante partum or post partum or puerper* or primigravid* or primiparous or multiparous or nulliparous or multigravid* or trimester* or obstetric*).ti,kf.

3. 1 and 2

4. ((pregnan* or maternal or antenatal or prenatal or perinatal or postnatal or prepartum or antepartum or postpartum or puerper* or pre partum or ante partum or post partum) adj5 (exercise or physical* activ* or strenuous activit* or physical* inactiv* or sedentary or running or plyometric* or yoga or tai chi or weight training or resistance training or (weight* adj2 lift*) or swim* or sport* or athlet* or walk or walking or mvpa or ltpa or stretching or aerobic capacity or fitness or ((muscle or muscular or strength*) adj2 conditioning))).ab.

5. 3 or 4

6. exp birth weight/ or fetal weight/

7. infant, low birth weight/ or infant, small for gestational age/ or exp infant, very low birth weight/ or infant, postmature/ or exp infant, premature/

8. ((preterm or pre matur* or prematur* or post matur* or postmatur*) adj2 birth).mp.

9. Fetal Growth Retardation/ or fetal hypoxia/ or fetal macrosomia/

10. exp Fetal Development/ or exp Congenital Abnormalities/ or exp Fetus/ or (f?etus or f?etal).ti,hw,kf.

11. maternal fetal exchange/ or (exp Uterus/ and exp Regional Blood Flow/) or (placenta* or uteroplacenta* or ((maternal f?etal or f?etomaternal or transplacental) adj2 (transfusion or exchange))).mp.

12. ((f?etal or f?etus) adj2 (response or matur*)).mp.

13. ((f?etal or f?etus or neonat* or newborn or infant) adj3 (growth or develop* or viability or viable or weight or wellbeing or well being or health or heart rate or heartrate or bradycardia or hypoxi* or hypoglyc?emi* or movement or oxygenation)).mp.

14. (((uterine or uterus) adj2 (blood flow or circulat*)) or ((uterine or umbilical or mid* cerebral) adj2 doppler)).mp.

15. (intrauterine growth or iugr).mp.

16. ((perinatal or f?etal or f?etus or neonat* or newborn* or infant*) adj3 (mortality or morbidity or death or outcome* or complication*)).mp.

17. (still birth or stillbirth).mp.

18. (birth weight or birthweight or macrosomia or gestational age or lga or sga or preterm or (prematur* adj2 (infant* or neonat* or newborn* or birth or labo?r))).mp.

19. ((neonatal or newborn* or infant* or f?etus or f?etal) and (fat* or abdominal circumference or body composition or bmi or body mass index or waist circumference or skeletal size or height or anthropometric* or apgar or adipos* or ph or base excess or metabolic or acidosis or insulin or diabet* or hyperbilirubin?emi*)).mp.

20. (f?etus or f?etal).mp. and (adaptation, physiological/ or me.fs.)

21. (((birth or delivery) adj3 (trauma or injur* or defect*)) or (dystocia or nicu or neonatal intensive care or brachial plexus)).mp.

22. exp Birth Injuries/

23. ((neonat* or infant* or newborn*) and (ponderal index or skinfold or bmi or body mass index)).mp.

24. Cerebral Palsy/ or exp Neural Tube Defects/ or Cleft Palate/ or (cerebral palsy or neural tube defect* or spina bifida or anencephal* or encephalocele* or iniencephal* or spinal dyraphism or diastematomyel* or lipomingocele* or lipmyelomeningocele* or meningomyelocele* or cleft palate* or cleft lip*).mp.

25. (((development* or learning or intellectual* or cognitive* or language or communication or speech or motor) adj2 (disorder* or disab* or delay*)) or behavio?r disorder* or attention deficit or autis* or asperger* or child development or developmental milestone* or neurodevelopment* or cognitive development or motor development or motor skill* or psychosocial development or chronic disease* or chronic illness* or cardiovascular or cardiometabolic or diabet* or heart disease*).mp. or exp Heart Disease/ or exp Mental Disorders Diagnosed in Childhood/

26. Pediatric Obesity/ or ((child* or p?ediatric) adj2 (obes* or overweight)).mp.

27. or/6-25

28. 5 and 27

29. (animals/ not (animals/ and humans/)) or ((rat or rats or mouse or mice or cow or cows or bovine or sheep or ewe*) not ((rat or rats or mouse or mice or cow or cows or bovine or cattle or sheep or ewe*) and (human* or women))).ti,ab,kf. or (rat or rats or mouse or mice or cow or cows or bovine or cattle or sheep or ewe*).ti.

30. 28 not 29

EMBASE

1. exp *exercise/ or *athlete/ or exp *kinesiotherapy/ or exp *sport/ or exp *physical activity/ or *sedentary lifestyle/ or (exercise or physical* activ* or physical* inactiv* or sedentary or running or plyometric* or yoga or tai chi or weight training or resistance training or swim* or sport* or athlet* or walk or walking or mvpa or ltpa or stretching or aerobic capacity or fitness or sport*).ti,kw. or exercise.ab. /freq=2 or (weight* adj2 lift*).ti,kw. or ((muscle or muscular or strength*) adj2 conditioning).ti,kw.

2. exp pregnancy/ or exp pregnancy complications/ or pregnancy outcome/ or perinatal period/ or puerperium/ or pregnan*.hw. or (pregnan* or antenatal or prenatal or perinatal or postnatal or prepartum or antepartum or postpartum or pre partum or ante partum or post partum or puerper* or primigravid* or primiparous or multiparous or nulliparous or multigravid* or trimester* or obstetric*).ti,kw.

3. 1 and 2

4. ((pregnan* or maternal or antenatal or prenatal or perinatal or postnatal or prepartum or antepartum or postpartum or pre partum or ante partum or post partum or puerper*) adj5 (exercise or physical* activ* or strenuous activit* or physical* inactiv* or sedentary or running or plyometric* or yoga or tai chi or weight training or resistance training or (weight* adj2 lift*) or swim* or sport* or athlet* or walk or walking or mvpa or ltpa or stretching or aerobic capacity or fitness or ((muscle or muscular or strength*) adj2 conditioning))).ab.

5. 3 or 4

6. fetus/ or exp birth weight/ or fetus weight/ or "parameters concerning the fetus, newborn and pregnancy"/ or apgar score/ or fetus heart rate/ or exp fetus maturity/ or fetus mortality/ or fetus outcome/ or fetus risk/ or gestational age/ or live birth/ or exp perinatal morbidity/ or exp perinatal mortality/ or prenatal mortality/ or exp intrauterine growth retardation/ or exp "immature and premature labor"/ or exp fetus growth/ or exp prenatal growth/ or fetus hypoxia/ or macrosomia/ or exp fetus development/ or exp congenital disorder/ or exp fetus disease/ or fetomaternal transfusion/ or exp stillbirth/ or spontaneous abortion/ or birth injury/ or cerebral palsy/ or exp neural tube defect/ or child development/ or postnatal development/ or exp mental development/ or childhood obesity/ or exp body composition/ or anthropometric parameters/ or abdominal circumference/ or hip circumference/ or sagittal abdominal diameter/ or waist circumference/ or waist hip ratio/ or waist to height ratio/ or weight height ratio/

7. placenta insufficiency/

8. 6 or 7

9. (f?etus or f?etal).ti,hw,kw. or ((f?etal or f?etus) adj2 (response or matur*)).mp.

10. (placenta* or uteroplacenta* or ((maternal f?etal or transplacental or f?etomaternal) adj2 (exchange or transfusion))).mp.

11. ((f?etal or f?etus or neonat* or newborn or infant) adj3 (growth or develop* or viability or viable or weight or wellbeing or well being or health or heart rate or heartrate or bradycardia or hypoxi* or hypoglyc?emi* or movement or oxygenation)).mp.

12. (((uterine or uterus) adj2 (blood flow or circulat*)) or ((uterine or umbilical or mid* cerebral) adj2 doppler)).mp.

13. (intrauterine growth or iugr).mp.

14. ((perinatal or f?etal or f?etus or neonat* or newborn* or infant*) adj3 (mortality or death or outcome* or complication*)).mp.

15. (still birth or stillbirth).mp.

16. (birth weight or birthweight or macrosomia or gestational age or lga or sga or preterm or (prematur* adj2 (infant* or neonat* or newborn* or birth or labo?r))).mp.

17. ((neonatal or newborn* or infant* or f?etus or f?etal) and (fat* or abdominal circumference or body composition or bmi or body mass index or waist circumference or skeletal size or height or anthropometric* or apgar or adipos* or ph or base excess or metabolic or acidosis or insulin or diabet* or hyperbilirubin?emi*)).mp.

18. (((birth or delivery) adj3 (trauma or injur* or defect*)) or (dystocia or nicu or neonatal intensive care or brachial plexus)).mp.

19. ((neonat* or infant* or newborn*) and (ponderal index or skinfold or bmi or body mass index)).mp.

20. (cerebral palsy or neural tube defect* or spina bifida or anencephal* or encephalocele* or iniencephal* or spinal dyraphism or diastematomyel* or lipomingocele* or lipmyelomeningocele* or meningomyelocele* or cleft palate* or cleft lip*).mp.

21. (((development* or learning or intellectual* or cognitive* or language or communication or speech or motor) adj2 (disorder* or disab* or delay* or impair*)) or behavio?r disorder* or attention deficit or autis* or asperger* or child development or developmental milestone* or neurodevelopment* or cognitive development or motor development or motor skill* or psychosocial development or chronic disease* or chronic illness* or cardiovascular or cardiometabolic or diabet* or heart disease*).mp. or childhood disease/ or exp infant disease/ or exp "disorders of higher cerebral function"/ or exp heart disease/

22. ((child* or p?ediatric) adj2 (obes* or overweight)).mp.

23. or/9-22

24. 8 or 23

25. 5 and 24

26. exp animal/ not (exp animal/ and human/)

27. 25 not 26

PsycInfo

1. physical activity/ or exp exercise/ or activity level/ or athletes/ or exp sports/ or ((exercise or physical* activ* or strenuous activit* or physical* inactiv* or sedentary or running or plyometric* or yoga or tai chi or weight training or resistance training or swim* or sport* or athlet* or walk or walking or mvpa or ltpa or stretching or aerobic capacity).ti,ab,id. or ((weight* adj2 lift*) or ((muscle or muscular or strength*) adj2 conditioning))).ti,ab,id.

2. exp pregnancy/ or obstetrical complications/ or pregnancy outcomes/ or pregnan*.ti,hw,id. or (antenatal or prenatal or perinatal or postnatal or prepartum or antepartum or postpartum or primigravid* or primiparous or multiparous or nulliparous or multigravid* or trimester* or obstetric*).ti,ab,id.

3. 1 and 2

4. prenatal development/ or birth weight/ or prenatal exposure/ or premature birth/ or fetus/ or amniotic fluid/ or (blood flow/ and uterus/)

5. (f?etus or f?etal or ((preterm or pre matur* or prematur* or post matur* or postmatur*) adj2 birth)).mp.

6. (placenta* or uteroplacenta* or ((maternal f?etal or f?etomaternal or transplacental) adj2 (transfusion or exchange))).mp.

7. ((neonat* or newborn or infant) adj3 (growth or develop* or viability or viable or weight or wellbeing or well being or health or heart rate or heartrate or bradycardia or hypoxi* or hypoglyc?emi* or movement or oxygenation)).mp.

8. (((uterine or uterus) adj2 (blood flow or circulat*)) or ((uterine or umbilical or mid* cerebral) adj2 doppler)).mp.

9. (intrauterine growth or iugr).mp.

10. ((perinatal or f?etal or f?etus or neonat* or newborn* or infant*) adj3 (mortality or morbidity or death or outcome* or complication*)).mp.

11. (still birth or stillbirth).mp.

12. (birth weight or birthweight or macrosomia or gestational age or lga or sga or preterm or (prematur* adj2 (infant* or neonat* or newborn* or birth or labo?r))).mp.

13. ((neonatal or newborn* or infant* or f?etus or f?etal) and (fat* or abdominal circumference or body composition or bmi or body mass index or waist circumference or skeletal size or height or anthropometric* or apgar or adipos* or ph or base excess or metabolic or acidosis or insulin or diabet* or hyperbilirubin?emi*)).mp.

14. (((birth or delivery) adj3 (trauma or injur* or defect*)) or (dystocia or nicu or neonatal intensive care or brachial plexus)).mp.

15. birth injuries/ or birth trauma/

16. ((neonat* or infant* or newborn*) and (ponderal index or skinfold or bmi or body mass index)).mp.

17. exp congenital disorders/ or cerebral palsy/ or cleft palata/ or (cerebral palsy or neural tube defect* or spina bifida or anencephal* or encephalocele* or iniencephal* or spinal dyraphism or diastematomyel* or lipomingocele* or lipmyelomeningocele* or meningomyelocele* or cleft palate* or cleft lip*).mp.

18. exp developmental disabilities/ or exp communication disorders/ or exp delayed development/ or exp intellectual development disorder/ or exp learning disorders/ or exp nervous system disorders/ or exp pervasive developmental disorders/

19. (((development* or learning or intellectual* or cognitive* or language or communication or speech or motor) adj2 (disorder* or disab* or delay*)) or behavio?r disorder* or attention deficit or autis* or asperger* or child development or developmental milestone* or neurodevelopment* or cognitive development or motor development or motor skill* or psychosocial development or chronic disease* or chronic illness* or cardiovascular or cardiometabolic or diabet* or heart disease*).mp. or health disorders/

20. ((child* or p?ediatric) adj2 (obes* or overweight)).mp.

21. or/4-20

22. 3 and 21

23. first posting.ps.

24. 22 not 23

25. limit 24 to human

26. 22 not 24

27. 25 or 26

CINAHL

S1 ( (MH "Exercise+") OR (MH "Athletes+") OR (MH "Therapeutic Exercise+") OR (MH "Physical Fitness+") OR (MH "Physical Activity") OR (MH "Physical Endurance+") OR (MH "Exertion+") OR (MH "Sports+") OR (MH "Life Style, Sedentary") OR (MH "Yoga+") OR (MH "Tai Chi") ) OR TI ( exercise or "physical* activ*" or "strenuous activit*" or "physical* inactiv*" or sedentary or running or plyometric* or yoga or "tai chi" or "weight training" or "resistance training" or swim* or sport* or athlet* or walk or walking or mvpa or ltpa or stretching or "aerobic capacity" or fitness or weight* n2 lift* or (muscle or muscular or strength*) n2 conditioning )

S2 ( (MH "Pregnancy") OR (MH "Pregnancy Complications+") OR (MH "Pregnancy Outcomes") OR (MH "Pregnancy Trimesters+") OR (MH "Postnatal Period") OR (MH "Puerperium") ) OR MW pregnan* OR TI ( pregnan* or antenatal or prenatal or perinatal or postnatal or prepartum or antepartum or postpartum or pre partum or ante partum or post partum or puerper* or primigravid* or primiparous or multiparous or nulliparous or multigravid* or trimester* or obstetric* )

S3 S1 AND S2

S4 AB ((pregnan* or maternal or antenatal or prenatal or perinatal or postnatal or prepartum or antepartum or postpartum or puerper* or "pre partum" or "ante partum" or "post partum") n5 (exercise or "physical* activ*" or "strenuous activit*" or "physical* inactiv*" or sedentary or running or plyometric* or yoga or "tai chi" or "weight training" or "resistance training" or weight* n2 lift* or "lift* weight*" or swim* or sport* or athlet* or walk or walking or mvpa or ltpa or stretching or "aerobic capacity" or fitness or (muscle or muscular or strength*) n2 conditioning)

S5 S3 OR S4

S6 (MH "Birth Weight") OR (MH "Infant, Very Low Birth Weight") OR (MH "Infant, Low Birth Weight+") OR (MH "Fetal Weight") OR (MH "Infant, Small for Gestational Age") OR (MH "Infant, Premature") OR (MH "Infant, Premature, Diseases+") OR (MH "Fetal Growth Retardation") OR (MH "Fetal Anoxia") OR (MH "Fetal Macrosomia") OR (MH "Infant, Postmature") OR (MH "Infant, Large for Gestational Age") OR (MH "Fetus+") OR (MH "Maternal-Fetal Exchange") OR (MH "Perinatal Death") OR (MH "Birth Injuries+") OR (MH "Cerebral Palsy") OR (MH "Neural Tube Defects+") OR (MH "Cleft Palate") OR (MH "Heart Diseases+") OR (MH "Mental Disorders Diagnosed in Childhood+") OR (MH "Pediatric Obesity")

S7 (MH "Uterus+") AND (MH "Blood Circulation+")

S8 ( TI (f#etus or f#etal) or MW (f#etus OR f#etal OR ( placenta* or uteroplacenta* or ("maternal f#etal" or f#etomaternal or transplacental) w2 (transfusion or exchange) or (f#etal or f#etus) w2 (response or matur*) )

S9 ( (f#etal or f#etus or neonat* or newborn or infant) n3 (growth or develop* or viability or viable or weight or wellbeing or "well being" or health or "heart rate" or heartrate or bradycardia or hypoxi* or hypoglyc#emi* or movement or oxygenation) ) OR ( (uterine or uterus) n2 ("blood flow" or circulat*) or (uterine or umbilical or mid* cerebral) n2 doppler ) OR ( "intrauterine growth" or iugr )

S10 ( (perinatal or f#etal or f#etus or neonat* or newborn* or infant*) n3 (mortality or morbidity or death or outcome* or complication*) ) OR ( "still birth" or stillbirth or (preterm or "pre matur*" or prematur* or "post matur*" or postmatur*) w2 (birth or childbirth or labo#r or infant* or newborn* or neonat*) ) OR ( "birth weight" or birthweight or macrosomia or "gestational age" or lga or sga )

S11 ( (perinatal or f#etal or f#etus or neonat* or newborn* or infant*) n3 (mortality or morbidity or death or outcome* or complication*) ) OR ( "still birth" or stillbirth or (preterm or pre matur* or prematur* or post matur* or postmatur*) w2 (birth or childbirth or labo#r or infant* or newborn* or neonat*) ) OR ( "birth weight" or birthweight or macrosomia or gestational age or lga or sga ) OR ( (neonatal or newborn* or infant* or fetus or fetal or foetus or foetal) and (fat* or "abdominal circumference" or "body composition" or bmi or "body mass index" or "waist circumference" or "skeletal size" or height or anthropometric* or apgar or adipos* or ph or base n2 excess or metabolic or acidosis or insulin or diabet* or hyperbilirubin#emi*) )

S12 ( (MH "Adaptation, Physiological") OR MM metabolism ) AND ( f#etus or f#etal )

S13 ( (birth or delivery) n3 (trauma or injur* or defect*) or dystocia or nicu or "neonatal intensive care" or "brachial plexus" ) OR ( (neonat* or infant* or newborn*) and (ponderal index or skinfold or bmi or body mass index) ) OR ( "cerebral palsy" or "neural tube defect*" or "spina bifida" or anencephal* or encephalocele* or iniencephal* or "spinal dyraphism" or diastematomyel* or lipomingocele* or lipmyelomeningocele* or meningomyelocele* or "cleft palate*" or "cleft lip*" )

S14 ( (development* or learning or intellectual* or cognitive* or language or communication or speech or motor) n2 (disorder* or disab* or delay*) ) OR ( "behavio#r disorder*" or "attention deficit" or autis* or asperger* or "child development" or "developmental milestone*" or neurodevelopment* or "cognitive development" or "motor development" or "motor skill*" or "psychosocial development" or "chronic disease*" or "chronic illness*" or cardiovascular or cardiometabolic or diabet* or "heart disease*" ) OR ( (child* or p#ediatric) n2 (obes* or overweight) )

S15 S6 OR S7 OR S8 OR S9 OR S10 OR S11 OR S12 OR S13 OR S14

S16 S5 AND S15

Sport Discus/Child Development & Adolescent Studies/ERIC

S1 exercise or "physical* activ*" or "strenuous activit*" or "physical* inactiv*" or sedentary or running or plyometric* or yoga or "tai chi" or "weight training" or "resistance training" or swim* or sport* or athlet* or walk or walking or mvpa or ltpa or stretching or "aerobic capacity" or fitness or weight* n2 lift* or (muscle or muscular or strength*) n2 conditioning

S2 pregnan* or antenatal or prenatal or perinatal or postnatal or prepartum or antepartum or postpartum or "pre partum" or "ante partum" or "post partum" or puerper* or primigravid* or primiparous or multiparous or nulliparous or multigravid* or trimester* or obstetric*

S3 S1 and S2

S4 ( f#etus or f#etal or ( placenta* or uteroplacenta* or ("maternal f#etal" or f#etomaternal or transplacental) w2 (transfusion or exchange) or (f#etal or f#etus) w2 (response or matur*) ) ) OR ( (f#etal or f#etus or neonat* or newborn or infant) n3 (growth or develop* or viability or viable or weight or wellbeing or "well being" or health or heart rate or heartrate or bradycardia or hypoxi* or hypoglyc#emi* or movement or oxygenation) ) OR ( (uterine or uterus) n2 ("blood flow" or "blood circulat*") or (uterine or umbilical or mid* cerebral) n2 doppler or "intrauterine growth" or iugr )

S5 ( (perinatal or f#etal or f#etus or neonat* or newborn* or infant*) n3 (mortality or morbidity or death or outcome* or complication*) ) OR ( "still birth" or stillbirth or (preterm or "pre matur*" or prematur* or "post matur*" or postmatur*) w2 (birth or childbirth or labo#r or infant* or newborn* or neonat*) ) OR ( “birth weight" or birthweight or macrosomia or "gestational age" or lga or sga ) OR ( (neonatal or newborn* or infant* or f#etus or f#etal) and (fat* or "abdominal circumference" or "body composition" or bmi or "body mass index" or "waist circumference" or "skeletal size" or height or anthropometric* or apgar or adipos* or ph or base n2 excess or metabolic or acidosis or insulin or diabet* or hyperbilirubin#emi*) )

S6 ( birth or delivery) n3 (trauma or injur* or defect*) or dystocia or nicu or "neonatal intensive care" or "brachial plexus" ) OR ( (neonat* or infant* or newborn*) and ("ponderal index" or skinfold or bmi or body mass index) ) OR ( "cerebral palsy" or "neural tube defect*" or "spina bifida" or anencephal* or encephalocele* or iniencephal* or "spinal dyraphism" or diastematomyel* or lipomingocele* or lipmyelomeningocele* or meningomyelocele* or "cleft palate*" or "cleft lip*" )

S7 ( (development* or learning or intellectual* or cognitive* or language or communication or speech or motor) n2 (disorder* or disab* or delay*) ) OR ( "behavio#r disorder*" or "attention deficit" or autis* or asperger* or "child development" or "developmental milestone*" or neurodevelopment* or "cognitive development" or "motor development" or "motor skill*" or "psychosocial development" or "chronic disease*" or "chronic illness*" or cardiovascular or cardiometabolic or diabet* or "heart disease*" ) OR ( (child* or p#ediatric) n2 (obes* or overweight) )

S8 S4 OR S5 OR S6 OR S7

S9 S3 AND S8

Scopus

((TITLE-ABS-KEY( fetus or fetal or foetus or foetal or "intrauterine growth" or iugr) OR TITLE-ABS-KEY((placenta* or uteroplacenta* or "maternal fetal" or "maternal foetal" or fetomaternal or foetomaternal or transplacental) w/2 transfusion)) or (TITLE-ABS-KEY((fetal or foetal or fetus or foetus) w/2 (response or matur*))) or (TITLE-ABS-KEY ( ( ( uterine OR uterus ) W/2 ( "blood flow" OR circulat* ) ) OR ( ( uterine OR umbilical OR "mid* cerebral" ) W/2 doppler ) OR "intrauterine growth" OR iugr )) or (TITLE-ABS-KEY((fetal or foetal or fetus or foetus or neonat* or newborn or infant) and (growth or develop* or viability or viable or weight or wellbeing or "well being" or health or heart rate or heartrate or bradycardia or hypoxi* or hypoglycemi* or hypoglycaemi* or movement or oxygenation))) or (TITLE-ABS-KEY("still birth" or stillbirth or ((preterm or "pre matur*" or prematur* or "post matur*" or postmatur*) w/2 (birth or childbirth or labor or labour or infant* or newborn* or neonat*))) OR TITLE-ABS-KEY(( "birth weight" or birthweight or macrosomia or "gestational age" or lga or sga ) ) OR TITLE-ABS-KEY(((neonatal or newborn* or infant* or fetus or fetal or foetus or foetal) and (fat* or "abdominal circumference" or "body composition" or bmi or "body mass index" or "waist circumference" or "skeletal size" or height or anthropometric* or apgar or adipos* or ph or "base excess" or metabolic or acidosis or insulin or diabet* or hyperbilirubinemi* or hyperbilirubinaemi*)))) or (TITLE-ABS-KEY((perinatal or fetal or fetus or foetal or foetus or neonat* or newborn* or infant*) W/3 (mortality or morbidity or death or outcome* or complication*) )) or (TITLE-ABS-KEY((( birth or delivery) w/3 (trauma or injur* or defect*)) or dystocia or nicu or "neonatal intensive care" or "brachial plexus" ) OR TITLE-ABS-KEY(( (neonat* or infant* or newborn*) and ("ponderal index" or skinfold or bmi or body mass index) ) ) OR TITLE-ABS-KEY("cerebral palsy" or "neural tube defect*" or "spina bifida" or anencephal* or encephalocele* or iniencephal* or "spinal dyraphism" or diastematomyel* or lipomingocele* or lipmyelomeningocele* or meningomyelocele* or "cleft palate*" or "cleft lip" )) or (TITLE-ABS-KEY(( (development* or learning or intellectual* or cognitive* or language or communication or speech or motor) w/2 (disorder* or disab* or delay*) )) OR TITLE-ABS-KEY("behavior disorder*" or "behaviour disorder*" or "attention deficit" or autis* or asperger* or "child development" or "developmental milestone*" or neurodevelopment* or "cognitive development" or "motor development" or "motor skill*" or "psychosocial development" or "chronic disease*" or cardiovascular or cardiometabolic or diabet* or "heart disease*") OR TITLE-ABS-KEY(( (child* or pediatric or paediatric) w/2 (obes* or overweight) )))) and ((TITLE( exercise* OR "physical* activ*" OR "strenuous activit*" OR "physical inactiv*" OR sedentary OR running OR plyometric* OR yoga OR "tai chi" OR "weight training" OR "resistance training" OR swim* OR sport* OR athlet* OR walk OR walking OR "muscle strengthening" OR "muscle conditioning" OR "muscular conditioning" OR "weight lifting" OR "lifting weight*" )) AND (TITLE-ABS-KEY ( pregnan* or antenatal or prenatal or perinatal or postnatal or prepartum or antepartum or postpartum or "pre partum" or "ante partum" or "post partum" or puerper* or primigravid* or primiparous or multiparous or nulliparous or multigravid* or trimester* or obstetric*))) AND NOT TITLE-ABS-KEY(rat or rats or mouse or mice or cow or cows or bovine or cattle or sheep or ewe*)

Web of Science Core Collection (including Emerging Sources Citation Index)

#1 TI=(exercise* or "physical* activ*" or "strenuous activit*" or "physical inactiv*" or sedentary or running or plyometric* or yoga or "tai chi" or "weight training" or "resistance training" or swim* or sport* or athlet* or walk or walking or (muscle* or muscular or strength) near/2 conditioning or weight* near/2 lift*)

#2 TS=(pregnan* or antenatal or prenatal or perinatal or postnatal or prepartum or antepartum or postpartum or pre partum or ante partum or post partum or puerper* or primigravid* or primiparous or multiparous or nulliparous or multigravid* or trimester* or obstetric*)

#3 #1 AND #2

#4 TI=(f$etus or f$etal) or TS=(placenta* or uteroplacenta* or ("maternal f$etal" or f$etomaternal or transplacental) near/2 (transfusion or exchange) or (f$etal or f$etus) near/2 (response or matur*) )

#5 TS=((f$etal or f$etus or neonat* or newborn or infant) near/3 (growth or develop* or viability or viable or weight or wellbeing or "well being" or health or "heart rate" or heartrate or bradycardia or hypoxi* or hypoglyc$emi* or movement or oxygenation) OR (uterine or uterus) near/2 ("blood flow" or "circulat*") or ((uterine or umbilical or "mid* cerebral") near/2 doppler) OR "intrauterine growth" or iugr )

#6 TS=( (perinatal or f$etal or f$etus or neonat* or newborn* or infant*) near/3 (mortality or morbidity or death or outcome* or complication*) OR "still birth" or stillbirth OR "birth weight" or birthweight or macrosomia or "gestational age" or lga or sga )

#7 TS=( (perinatal or f$etal or f$etus or neonat* or newborn* or infant*) near/3 (mortality or morbidity or death or outcome* or complication*) OR "still birth" or stillbirth or (preterm or "pre matur*" or prematur* or "post matur*" or postmatur*) near/2 (birth or childbirth or labo$r or infant* or newborn* or neonat*) OR "birth weight" or birthweight or macrosomia or gestational age or lga or sga OR (neonatal or newborn* or infant* or f$etus or f$etal) and (fat* or "abdominal circumference" or "body composition" or bmi or "body mass index" or "waist circumference" or "skeletal size" or height or anthropometric* or apgar or adipos* or ph or base near/2 excess or metabolic or acidosis or insulin or diabet* or hyperbilirubin$emi*))

#8 TS=((birth or delivery) near/3 (trauma or injur* or defect*) or dystocia or nicu or "neonatal intensive care" or "brachial plexus" OR ( (neonat* or infant* or newborn*) and (ponderal index or skinfold or bmi or body mass index) ) OR "cerebral palsy" or "neural tube defect*" or "spina bifida" or anencephal* or encephalocele* or iniencephal* or "spinal dyraphism" or diastematomyel* or lipomingocele* or lipmyelomeningocele* or meningomyelocele* or "cleft palate*" or "cleft lip*" )

#9 TS=( (development* or learning or intellectual* or cognitive* or language or communication or speech or motor) near/2 (disorder* or disab* or delay*) OR "behavio$r disorder*" or "attention deficit" or autis* or asperger* or "child development" or "developmental milestone*" or neurodevelopment* or "cognitive development" or "motor development" or "motor skill*" or "psychosocial development" or "chronic disease*" or "chronic illness*" or cardiovascular or cardiometabolic or diabet* or "heart disease*" OR (child* or p$ediatric) near/2 (obes* or overweight) )

#10 #9 OR #8 OR #7 OR #6 OR #5 OR #4

#11 #3 AND #10

#12 TS=(rat or rats or mouse or mice or cow or cows or bovine or cattle or sheep or ewe*)

#13 #11 NOT #12

Clinicatrials.gov

(exercise OR "physical activity" ) AND (antenatal OR prenatal OR perinatal OR postnatal OR prepartum OR antepartum OR postpartum OR "pre partum" OR fetus OR foetus OR fetal OR foetal)

(exercise OR "physical activity" ) AND ("ante partum" OR "post partum" OR puerper* OR primigravida OR primiparous OR multiparous OR nulliparous OR multigravida OR trimester OR trimesters OR obstetric)

**TRIP**

title(exercise OR "physical activity" ) AND title(pregnan* or antenatal OR prenatal OR perinatal OR postnatal OR prepartum OR antepartum OR postpartum OR "pre partum" OR fetus OR foetus OR fetal OR foetal)

**References**

**EXCLUDED STUDIES**

| **No outcome of interest** |
| --- |
| **A. A. Amaeze, M. T. Anasonye, U. O. Abaraogu, S. E. Igwe and U. A. C. Okafor.** Birth weight does not associate with gestational physical activity profile: A retrospective cohort study. *African Journal for Physical, Health Education, Recreation & Dance.* 2015. 21:860-868 |
| **A. A. Johnson, E. M. Knight, C. H. Edwards, et al.** Selected lifestyle practices in urban African American women--relationships to pregnancy outcome, dietary intakes and anthropometric measurements. *J.Nutr.* 1994. 124:963S-972S |
| **A. Alegre, F. Rodriguez-Escudero, E. Cruz and M. Prada.** Influence of work during pregnancy on fetal weight. *J.Reprod.Med.* 1984. 29:334-336 |
| **A. B. Granath, M. S. Hellgren and R. K. Gunnarsson.** Water aerobics reduces sick leave due to low back pain during pregnancy. *Journal of obstetric, gynecologic, and neonatal nursing : JOGNN.* 2006. 35:465-471 |
| **A. Bener and N. M. Saleh.** The impact of socio-economic, lifestyle habits, and obesity in developing of pregnancy-induced hypertension in fast-growing country: global comparisons. 2013. 40:52-57 |
| **A. Bergmann, M. Zygmunt and J. F. Clapp 3.** Running throughout pregnancy: effect on placental villous vascular volume and cell proliferation. *Placenta.* 2004. 25:694-698 |
| **A. Bertolotto, L. Volpe, A. Calianno, et al.** Physical activity and dietary habits during pregnancy: effects on glucose tolerance. *Journal of Maternal-Fetal & Neonatal Medicine.* 2010. 23:1310-1314 |
| **A. Besnier, P. Therme and T. Marqueste.** Influence of physical activity and sports practice before and during pregnancy on the development of gestational diabetes. *Revue Sage - Femme.* 2015. |
| **A. Bonen, P. D. Campagna, L. Gilchrist and P. Beresford.** Substrate and hormonal responses during exercise classes at selected stages of pregnancy. *Canadian Journal of Applied Physiology.* 1995. 20:440-451 |
| **A. Bowen, N. Stewart, M. Baetz and N. Muhajarine.** Antenatal depression in socially high-risk women in Canada. 2009. 63:414-416 |
| **A. Bugalho, A. Bacci and S. Bergstrom.** Risk factors in Mozambican women with eclampsia: a case-referent study. 2001. 5:30-35 |
| **A. C. Hackney, V. L. Katz, W. J. Watson, M. M. Gall and R. G. McMurray.** Alpha-fetoprotein, prolactin and cortisol responses to maximal exercise during pregnancy. *Scandinavian Journal of Medicine and Science in Sports.* 1993. 3:41-45 |
| **A. Chiolero, G. Paradis and J. S. Kaufman.** Assessing the possible direct effect of birth weight on childhood blood pressure: a sensitivity analysis. *Am.J.Epidemiol.* 2014. 179:4-11 |
| **A. Coban, G. G. Arslan, A. Colakfakioglu and A. Sirlan.** Impact on quality of life and physical ability of pregnancy-related back pain in the third trimester of pregnancy. 2011. 61:1122-1124 |
| **A. Coxon and J. W. Haggith.** The effects of abdominal decompression on vascular haemodynamics in pregnancy and labour. *Journal of Obstetrics & Gynaecology of the British Commonwealth.* 1971. 78:49-54 |
| **A. Croteau, S. Marcoux and C. Brisson.** Work activity in pregnancy, preventive measures, and the risk of delivering a small-for-gestational-age infant. *Am.J.Public Health.* 2006. 96:846-855 |
| **A. Croteau, S. Marcoux and C. Brisson.** Work activity in pregnancy, preventive measures, and the risk of delivering a small-for-gestational-age infant. 2006. 96:846-855 |
| **A. D. Larsen, H. Hannerz, M. Juhl, et al.** Psychosocial job strain and risk of adverse birth outcomes: A study within the Danish national birth cohort. 2013. 70:845-851 |
| **A. D. McDonald, B. Armstrong and N. M. Cherry.** Spontaneous abortion and occupation. *Journal of Occupational Medicine.* 1986. 28:1232-1238 |
| **A. D. McDonald, J. C. McDonald, B. Armstrong, et al.** Fetal death and work in pregnancy. 1988. 45:148-157 |
| **A. D. McDonald, J. C. McDonald, B. Armstrong, N. M. Cherry, A. D. Nolin and D. Robert.** Prematurity and work in pregnancy. *Br.J.Ind.Med.* 1988. 45:56-62 |
| **A. D. Stein, J. M. Rivera and J. M. Pivarnik.** Measuring energy expenditure in habitually active and sedentary pregnant women. *Med.Sci.Sports Exerc.* 2003. 35:1441-1446 |
| **A. Dinc, N. Kizilkaya Beji and O. Yalcin.** Effect of pelvic floor muscle exercises in the treatment of urinary incontinence during pregnancy and the postpartum period. *Int.Urogynecol.J.Pelvic Floor Dysfunct.* 2009. 20:1223-1231 |
| **A. E. Beddoe, C. P. P. Yang, H. P. Kennedy, S. J. Weiss and K. A. Lee.** The Effects of Mindfulness-Based Yoga During Pregnancy on Maternal Psychological and Physical Distress. *Jognn-Journal of Obstetric Gynecologic and Neonatal Nursing.* 2009. 38:310-319 |
| **A. E. Beddoe, K. A. Lee, S. J. Weiss, H. P. Kennedy and C. P. Yang.** Effects of mindful yoga on sleep in pregnant women: a pilot study. 2010. 11:363-370 |
| **A. E. Montpetit, H. Plourde, T. R. Cohen and K. G. Koski.** Modeling the impact of prepregnancy BMI, physical activity, and energy intake on gestational weight gain, infant birth weight, and postpartum weight retention. *Journal of Physical Activity & Health.* 2012. 9:1020-1029 |
| **A. E. Ruifrok, E. Althuizen, N. Oostdam, et al.** PMC4189770; The relationship of objectively measured physical activity and sedentary behaviour with gestational weight gain and birth weight. *Journal of Pregnancy.* 2014. 2014:567379 |
| **A. ElDeeb, A. A. Sabbour, K. Abd-Ghafar and W. A. Ayad.** Effect of Stabilizing Exercises Augmented by Pelvic Floor Training on Postpartum Low Back Pain. *Journal of Womens Health.* 2016. 25:A11 |
| **A. F. Adeniyi and O. O. Ogwumike.** Physical activity and energy expenditure: findings from the Ibadan Pregnant Women's Survey. 2014. 18:117-126 |
| **A. F. Robledo-Colonia, N. Sandoval-Restrepo, Y. F. Mosquera-Valderrama, C. Escobar-Hurtado and R. Ramirez-Velez.** Aerobic exercise training during pregnancy reduces depressive symptoms in nulliparous women: a randomised trial. 2012. 58:9-15 |
| **A. F. Saftlas, N. Logsden-Sackett, W. Wang, R. Woolson and M. B. Bracken.** Work, leisure-time physical activity, and risk of preeclampsia and gestational hypertension. *Am.J.Epidemiol.* 2004. 160:758-765 |
| **A. Fast, L. Weiss, E. J. Ducommun, E. Medina and J. G. Butler.** Low-back pain in pregnancy. Abdominal muscles, sit-up performance, and back pain. 1990. 15:28-30 |
| **A. Fraser, K. Tilling, C. Macdonald-Wallis, et al.** Associations of gestational weight gain with maternal body mass index, waist circumference, and blood pressure measured 16 y after pregnancy: The Avon Longitudinal Study of Parents and Children (ALSPAC). *Am.J.Clin.Nutr.* 2011. 93:1285-1292 |
| **A. G. Cramp and L. R. Brawley.** Moms in motion: a group-mediated cognitive-behavioral physical activity intervention. 2006. 3:23 |
| **A. G. Cramp and S. R. Bray.** Pre- and postnatal women's leisure time physical activity patterns: a multilevel longitudinal analysis. 2009. 80:403-411 |
| **A. G. El-Metwalli, A. M. Badawy, L. A. El-Baghdadi and A. El-Wehady.** Occupational physical activity and pregnancy outcome. 2001. 100:41-45 |
| **A. Garshasbi and S. Faghih Zadeh.** The effect of exercise on the intensity of low back pain in pregnant women. *International Journal of Gynaecology & Obstetrics.* 2005. 88:271-275 |
| **A. Gaston and C. A. Vamos.** Leisure-time physical activity patterns and correlates among pregnant women in Ontario, Canada. *Maternal & Child Health Journal.* 2013. 17:477-484 |
| **A. Gaston and H. Prapavessis.** Tired, moody and pregnant? Exercise may be the answer. 2013. 28:1353-1369 |
| **A. Gaston and H. Prapavessis.** Using a combined protection motivation theory and health action process approach intervention to promote exercise during pregnancy. 2014. 37:173-184 |
| **A. Gaston, A. G. Cramp and H. Prapavessis.** Pregnancy--should women put up their feet or lace up their running shoes?: Self-presentation and the exercise stereotype phenomenon during pregnancy. 2012. 34:223-237 |
| **A. Gollenberg, P. Pekow, G. Markenson, K. L. Tucker and L. Chasan-Taber.** Dietary behaviors, physical activity, and cigarette smoking among pregnant Puerto Rican women. *Am.J.Clin.Nutr.* 2008. 87:1844-1851 |
| **A. Goodwin, J. Astbury and J. McMeeken.** Body image and psychological well-being in pregnancy. A comparison of exercisers and non-exercisers. *Australian and New Zealand Journal of Obstetrics and Gynaecology.* 2000. 40:442-447 |
| **A. Goodwin, J. Astbury and J. McMeeken.** Pregnancy: Does it change exercise participation?. 2000. 6:15-26 |
| **A. Gradmark, J. Pomeroy, F. Renstrom, et al.** Physical activity may offset pregnancy-related insulin resistance. *Diabetologia.* 2010. 53:S276 |
| **A. Gradmark, J. Pomeroy, F. Renstrom, et al.** PMC3130709; Physical activity, sedentary behaviors, and estimated insulin sensitivity and secretion in pregnant and non-pregnant women. *BMC Pregnancy & Childbirth.* 2011. 11:44 |
| **A. Gutke, H. C. Ostgaard and B. Oberg.** Predicting persistent pregnancy-related low back pain. 2008. 33:E386-93 |
| **A. Hart, N. Morris, S. B. Osborn and H. P. Wright.** Source: CLML. 5731:14586; Effective uterine bloodflow during exercise in normal and pre-eclamptic pregnancies. *Lancet.* 1956. 271:481-484 |
| **A. Himmelmann, A. Svensson, L. Sigstrom and L. Hansson.** Predictors of blood pressure and left ventricular mass in the young: the Hypertension in Pregnancy Offspring Study. *American Journal of Hypertension.* 1994. 7:381-389 |
| **A. Hui, L. Back, S. Ludwig, et al.** Exercise and dietary intervention increases physical activity, promotes healthy diet and reduces excessive gestational weight gain in pregnant women: A randomized controlled trial in Urban community. *Diabetes.* 2011. 60:A351 |
| **A. Hui, L. Back, S. Ludwig, et al.** Lifestyle intervention on diet and exercise reduced excessive gestational weight gain in pregnant women under a randomised controlled trial. *Bjog-an International Journal of Obstetrics and Gynaecology.* 2012. 119:70-77 |
| **A. J. Agopian, P. J. Lupo, M. A. Canfield, L. E. Mitchell and Defects Prevention National Birth.** Swimming pool use and birth defect risk. *American Journal of Obstetrics & Gynecology.* 2013. 209:219.e1-219.e9 |
| **A. J. Agopian, P. J. Lupo, M. A. Canfield, L. E. Mitchell and National Birth Defects Prevention, Study.** Swimming pool use and birth defect risk. 2013. 209:219.e1-219.e9 |
| **A. J. Martin Campillo.** Desarrollo motor del periodo prenatal al primer ano de vida, relacion conla Natacion. / Motor development from the prenatal period to the first year of life, relationship with Swimming. *Comunicaciones Tecnicas.* 1992. 5-19 |
| **A. Jakobovits.** The effect of maternal physical activity on fetal breathing movements. *Arch.Gynecol.* 1983. 234:47-48 |
| **A. Jayasudha.** Effect of antenatal exercises on labour outcome among primigravid mothers. *Nurs.J.India.* 2013. 104:10-13 |
| **A. Jukic, K. Evenson, J. Daniels, A. H. Herring, A. Wilcox and K. Hartmann.** A prospective study of the association between vigorous physical activity during pregnancy and length of gestation and birthweight. *Am.J.Epidemiol.* 2010. 171:S33 |
| **A. K. Ertan, S. Schanz, H. A. Tanriverdi, R. Meyberg and W. Schmidt.** Doppler examinations of fetal and uteroplacental blood flow in AGA and IUGR fetuses before and after maternal physical exercise with the bicycle ergometer. *J.Perinat.Med.* 2004. 32:260-265 |
| **A. K. Jenum, K. R. Richardsen, S. Berntsen and K. Morkrid.** Gestational diabetes, insulin resistance and physical activity in pregnancy in a multi-ethnic population - a public health perspective. 2013. 23:45-54 |
| **A. K. Ronnberg, I. Ostlund, H. Fadl, T. Gottvall and K. Nilsson.** Intervention during pregnancy to reduce excessive gestational weight gain-a randomised controlled trial. 2015. 122:537-544 |
| **A. Karabulut, A. U. Derbent, M. Yildirim, S. Simavli and N. O. Turhan.** Evaluation of risk factors and effect of physical activity in caesarean section in nulliparous women. *Journal of Maternal-Fetal & Neonatal Medicine.* 2012. 25:1456-1459 |
| **A. Kariminia, M. E. Chamberlain, J. Keogh and A. Shea.** PMC351839; Randomised controlled trial of effect of hands and knees posturing on incidence of occiput posterior position at birth. *BMJ.* 2004. 328:490 |
| **A. Kerssen, H. W. de Valk and G. H. Visser.** Day-to-day glucose variability during pregnancy in women with Type 1 diabetes mellitus: glucose profiles measured with the Continuous Glucose Monitoring System. 2004. 111:919-924 |
| **A. Khaledan, S. Mirdar, N. S. Motahari Tabari and M. A. Shirvani.** Effect of an Aerobic Exercise Program on Fetal Growth in Pregnant Women. *HAYAT.* 2010. 16:55-64 10p |
| **A. L. Brearley, M. Sherburn, M. P. Galea and S. J. Clarke.** Pregnant women maintain body temperatures within safe limits during moderate-intensity aqua-aerobic classes conducted in pools heated up to 33 degrees Celsius: an observational study. 2015. 61:199-203 |
| **A. L. Deierlein, A. M. Siega-Riz and A. Herring.** Dietary energy density but not glycemic load is associated with gestational weight gain. 2008. 88:693-699 |
| **A. L. Deierlein, A. Siega-Riz and K. R. Evenson.** PMC3387759; Physical activity during pregnancy and risk of hyperglycemia. *Journal of Women's Health.* 2012. 21:769-775 |
| **A. L. Gollenberg, P. Pekow, E. Bertone-Johnson, P. S. Freedson, G. Markenson and L. Chasan-Taber.** Physical activity and risk of small-for-gestational-age birth among predominantly Puerto Rican women. *Maternal & Child Health Journal.* 2011. 15:49-59 |
| **A. L. Gollenberg, P. Pekow, E. R. Bertone-Johnson, P. S. Freedson, G. Markenson and L. Chasan-Taber.** Sedentary behaviors and abnormal glucose tolerance among pregnant Latina women. 2010. 42:1079-1085 |
| **A. L. Hui, L. Back, A. Reid, et al.** Effects of physical activity and dietary intakes on weight gain of pregnant women with normal and above normal prepregnancy weight. *Canadian Journal of Diabetes.* 2012. 1):S8 |
| **A. L. Hui, L. Back, S. Ludwig, et al.** PMC4287470; Effects of lifestyle intervention on dietary intake, physical activity level, and gestational weight gain in pregnant women with different pre-pregnancy Body Mass Index in a randomized control trial. *BMC Pregnancy & Childbirth.* 2014. 14:331 |
| **A. L. Hui, S. Ludwig, P. Gardiner, et al.** Exercise and dietary intervention during pregnancy results in reduced excessive gestational weight gain. *Diabetes.* 2010. Conference Publication: (var.pagings).: |
| **A. L. Hui, S. M. Ludwig, P. Gardiner, et al.** Community-based exercise and dietary intervention during pregnancy: A pilot study. *Canadian Journal of Diabetes.* 2006. 30:169-175 |
| **A. L. Vallim, M. J. Osis, J. G. Cecatti, E. P. Baciuk, C. Silveira and S. R. Cavalcante.** PMC3113331; Water exercises and quality of life during pregnancy. *Reproductive Health.* 2011. 8:14 |
| **A. Lee, J. Karpavicius, E. Gasparini and D. Forster.** Implementing a diet and exercise program for limiting maternal weight gain in obese pregnant women: A pilot study. *Australian and New Zealand Journal of Obstetrics and Gynaecology.* 2012. 52:427-432 |
| **A. Lee, J. Karpavicius, E. Gasparini and D. Forster.** Implementing a diet and exercise program for limiting maternal weight gain in obese pregnant women: a pilot study. 2012. 52:427-432 |
| **A. Lemos, A. I. de Souza, J. N. Figueiroa, J. E. Cabral-Filho and A. D. de Andrade.** Respiratory muscle strength in pregnancy. 2010. 104:1638-1644 |
| **A. Lewkowitz, B. O'Donnell, S. Nakagawa, J. Vargas, Y. Cheng and M. Zlatnik.** Social media messaging in pregnancy: How Text4Baby compares to popular smart phone applications. *Obstet.Gynecol.* 2014. 1):S249-S250 |
| **A. Liquori, G. Widener and L. Clark.** Effects of a 6-week prenatal water exercise program on physiological parameters and well-being in women with pregnancies in the 2nd-3rd trimesters: a pilot study. *Journal of the Section on Women's Health.* 2003. 27:11-19 9p |
| **A. Lynch, C. Goodman, P. L. Choy, et al.** Maternal physiological responses to swimming training during the second trimester of pregnancy. *Research in Sports Medicine.* 2007. 15:33-45 13p |
| **A. M. Jukic, D. A. Lawlor, M. Juhl, et al.** Physical activity during pregnancy and language development in offspring. *Am.J.Epidemiol.* 2012. 175:S76 |
| **A. M. Jukic, K. R. Evenson, A. H. Herring, A. J. Wilcox, K. E. Hartmann and J. L. Daniels.** NIHMS494001 PMC3749786; Correlates of physical activity at two time points during pregnancy. *Journal of Physical Activity & Health.* 2012. 9:325-335 |
| **A. M. Lynch, C. Goodman, P. L. Choy, et al.** Maternal physiological responses to swimming training during the second trimester of pregnancy. 2007. 15:33-45 |
| **A. M. Lynch, S. McDonald, E. F. Magann, et al.** Effectiveness and safety of a structured swimming program in previously sedentary women during pregnancy. *Journal of Maternal-Fetal & Neonatal Medicine.* 2003. 14:163-169 |
| **A. M. Paolone, M. Shangold, D. Paul, J. Minnitti and S. Weiner.** Fetal heart rate measurement during maternal exercise--avoidance of artifact. *Medicine & Science in Sports & Exercise.* 1987. 19:605-609 |
| **A. M. Petersen, T. L. Leet and R. C. Brownson.** Correlates of physical activity among pregnant women in the United States. *Medicine & Science in Sports & Exercise.* 2005. 37:1748-1753 6p |
| **A. M. Stuebe, E. Oken and M. W. Gillman.** Associations of diet and physical activity during pregnancy with risk for excessive gestational weight gain. *Am.J.Obstet.Gynecol.* 2009. 201:58.e1-58.e8 |
| **A. M. Stuebe, E. Oken, M. W. Gillman, Alison M. Stuebe, Emily Oken and Matthew W. Gillman.** Associations of diet and physical activity during pregnancy with risk for excessive gestational weight gain. *American Journal of Obstetrics & Gynecology.* 2009. 201:58.e8 |
| **A. M. Wallace, D. B. Boyer, A. Dan and K. Holm.** Aerobic exercise, maternal self-esteem, and physical discomforts during pregnancy. 1986. 31:255-262 |
| **A. M. Z. Jukic, K. R. Evenson, A. H. Herring, A. J. Wilcox, K. E. Hartmann and J. L. Daniels.** Correlates of physical activity at two time points during pregnancy. 2012. 9:325-335 |
| **A. MacPhail, G. A. Davies, R. Victory and L. A. Wolfe.** Maximal exercise testing in late gestation: fetal responses. *Obstetrics & Gynecology.* 2000. 96:565-570 |
| **A. McGiveron, S. Foster, J. Pearce, M. A. Taylor, S. McMullen and S. Langley-Evans.** Limiting antenatal weight gain improves maternal health outcomes in severely obese pregnant women: findings of a pragmatic evaluation of a midwife-led intervention. *Journal of Human Nutrition & Dietetics.* 2015. 28 Suppl 1:29-37 |
| **A. Merkx, M. Ausems, L. Bude, R. de Vries and M. J. Nieuwenhuijze.** Weight gain in healthy pregnant women in relation to pre-pregnancy BMI, diet and physical activity. *Midwifery.* 2015. 31:693-701 |
| **A. Murtezani, M. Pacarada, Z. Ibraimi, A. Nevzati and N. Abazi.** The impact of exercise during pregnancy on neonatal outcomes: a randomized controlled trial. *Journal of Sports Medicine & Physical Fitness.* 2014. 54:802-808 |
| **A. Nakagaki, T. Inami, T. Minoura, R. Baba, S. Iwase and M. Sato.** Differences in autonomic neural activity during exercise between the second and third trimesters of pregnancy. *Journal of Obstetrics & Gynaecology Research.* 2016. 28:28 |
| **A. Nieto, R. Matorras, M. Serra, P. Valenzuela and J. Molero.** Multivariate analysis of determinants of fetal growth retardation. *European Journal of Obstetrics, Gynecology, & Reproductive Biology.* 1994. 53:107-113 |
| **A. Opala-Berdzik, B. Bacik, A. Markiewicz, et al.** Comparison of static postural stability in exercising and non-exercising women during the perinatal period. *Medical Science Monitor.* 2014. 20:1865-1870 |
| **A. P. Heenan and L. A. Wolfe.** Plasma acid-base regulation above and below ventilatory threshold in late gestation. *J.Appl.Physiol.* 2000. 88:149-157 |
| **A. P. Heenan and L. A. Wolfe.** Plasma osmolality and the strong ion difference predict respiratory adaptations in pregnant and nonpregnant women. 2003. 81:839-847 |
| **A. P. Heenan, L. A. Wolfe and G. A. Davies.** Maximal exercise testing in late gestation: maternal responses. *Obstetrics & Gynecology.* 2001. 97:127-134 |
| **A. P. Heenan, L. A. Wolfe, G. A. Davies and M. J. McGrath.** Effects of human pregnancy on fluid regulation responses to short-term exercise. *J.Appl.Physiol.* 2003. 95:2321-2327 |
| **A. P. Koemeester, J. P. Broersen and P. E. Treffers.** Physical work load and gestational age at delivery. 1995. 52:313-315 |
| **A. P. Koemeester, J. P. Broersen and P. E. Treffers.** PMC1128222; Physical work load and gestational age at delivery. *Occupational & Environmental Medicine.* 1995. 52:313-315 |
| **A. R. A. Adegboye, S. Rossner, M. Neovius, P. M. C. Lourenço and Y. Linné.** Relationships between prenatal smoking cessation, gestational weight gain and maternal lifestyle characteristics. 2010. 23:29-35 7 |
| **A. Rakhshani, R. Nagarathna, R. Mhaskar, A. Mhaskar, A. Thomas and S. Gunasheela.** PMC4320907; Effects of yoga on utero-fetal-placental circulation in high-risk pregnancy: a randomized controlled trial. *Advances in Preventive Medicine.* 2015. 2015:373041 |
| **A. Rakhshani, S. Maharana, N. Raghuram, H. R. Nagendra and P. Venkatram.** Effects of integrated yoga on quality of life and interpersonal relationship of pregnant women. *Quality of life research.* 2010. 19:1447-1455 |
| **A. Restall, R. S. Taylor, J. M. Thompson, et al.** PMC4065732; Risk factors for excessive gestational weight gain in a healthy, nulliparous cohort. *Journal of Obesity.* 2014. 2014:148391 |
| **A. Robledo-Colonia, N. Sandoval-Restrepo, Y. Mosquera-Valderrama, C. Escobar-Hurtado and R. Ramirez-Velez.** Aerobic exercise training during pregnancy reduces depressive symptoms in nulliparous women: a randomised trial. *Journal of Physiotherapy.* 2012. 58:9-15 |
| **A. Rodriguez and G. Bohlin.** Psychosocial predictors of smoking and exercise during pregnancy. 2000. 18:203-223 |
| **A. S. Cavalli and T. Tanaka.** PMC2723239; Relationship between maternal physical activities and preterm birth. *Environmental Health & Preventive Medicine.* 2001. 6:74-81 |
| **A. S. Cavalli and T. Tanaka.** PMC2723549; Maternal leisure-time physical activities are not determinant risk factors of low birthweight babies: A cross-sectional study of 1,714 pregnant women. *Environmental Health & Preventive Medicine.* 2000. 5:72-80 |
| **A. S. Tenforde, K. E. Toth, E. Langen, M. Fredericson and K. L. Sainani.** PMC4332642 Available on 03/01/16]; Running habits of competitive runners during pregnancy and breastfeeding. *Sports Health.* 2015. 7:172-176 |
| **A. Sijtsma, P. J. J. Sauer and E. Corpeleijn.** Parental correlations of physical activity and body mass index in young children- the GECKO Drenthe cohort. *International Journal of Behavioral Nutrition and Physical Activity.* 2015. 12: |
| **A. Spinillo, E. Capuzzo, F. Baltaro, G. Piazza, S. Nicola and A. Iasci.** The effect of work activity in pregnancy on the risk of fetal growth retardation. *Acta Obstet.Gynecol.Scand.* 1996. 75:531-536 |
| **A. Suputtitada, T. Wacharapreechanont and P. Chaisayan.** Effect of the "sitting pelvic tilt exercise" during the third trimester in primigravidas on back pain. *Journal of the Medical Association of Thailand.* 2002. 85 Suppl 1:S170-9 |
| **A. U. Derbent, A. Karabulut, M. Yildirim, S. A. Simavli and N. O. Turhan.** Evaluation of risk factors in cesarean delivery among multiparous women with a history of vaginal delivery. 2012. 13:15-20 |
| **A. V. M. Arizabaleta, L. O. Buitrago, de Plata, A. C. A., M. M. Escudero and R. Ram**. Aerobic exercise during pregnancy improves health-related quality of life: A randomised trial. 2010. 56:253-258 |
| **A. W. Bingham.** The prevention of obstetric complications by diet and exercise. 1932. 23:38-47 |
| **A. Williams, T. Reilly, I. Campbell and J. Sutherst.** Investigation of changes in responses to exercise and in mood during pregnancy. 1988. 31:1539-1549 |
| **A. Wojtyla, L. Kapka-Skrzypczak, P. Bilinski and P. Paprzycki.** Physical activity among women at reproductive age and during pregnancy (Youth Behavioural Polish Survey - YBPS and Pregnancy-related Assessment Monitoring Survay - PrAMS) - epidemiological population studies in Poland during the period 2010-2011. *Annals of Agricultural and Environmental Medicine.* 2011. 18:365-374 |
| **A. Wojtyla, L. Kapka-Skrzypczak, P. Paprzycki, M. Skrzypczak and P. Bilinski.** Epidemiological studies in Poland on effect of physical activity of pregnant women on the health of offspring and future generations - adaptation of the hypothesis development origin of health and diseases. *Annals of Agricultural & Environmental Medicine.* 2012. 19:315-326 |
| **Akhgar Ghassabian, Rajeshwari Sundaram, Amanda Wylie, Erin Bell, Scott C. Bello and Edwina Yeung.** Maternal medical conditions during pregnancy and gross motor development up to age 24 months in the Upstate KIDS study. *Developmental Medicine & Child Neurology.* 2016. 58:728-734 |
| **Akihito Takeuchi, Takashi Yorifuji, Kyohei Takahashi, et al.** Neurodevelopment in full-term small for gestational age infants: A nationwide japanese population-based study. *Brain Dev.* 2016. 38:529-537 |
| **Alison Tovar, Lauren B. Guthrie, Deborah Platek, Alison Stuebe, Sharon J. Herring and Emily Oken.** Modifiable predictors associated with having a gestational weight gain goal. 2011. 15:1119-1126 |
| **Anca Gaston, Philip M. Wilson, Diane E. Mack, Stephanie Elliot and Harry Prapavessis.** Understanding physical activity behavior and cognitions in pregnant women: An application of self-determination theory. 2013. 14:405-412 |
| **André Michael Toschke, Simon Rückinger, Eva Böhler and Rüdiger Von Kries.** Adjusted population attributable fractions and preventable potential of risk factors for childhood obesity. 2007. 10:902-906 5 |
| **Anja Podlesnik Fetih, Mateja Videmšek, Vislava Globevnik Velikonja, Eda Bokal Vrtačnik and Damir Karpljuk.** The state of mind of less physically active and regularly physically active women in the second trimester of their pregnancies. / duševní stay málo a pravidelnĕ tĕlesnĕ akitvních žen ve druhém tremestru tĕhotenstÍ. 2008. 38:37-44 |
| **Anonymous**. Acute Maternal and Fetal Effects of Exercise in Pregnancy. *Clinical Trials.* 2011. |
| **Anonymous**. Descriptive Epidemiology of Objectively Measured Walking Among US Pregnant Women: National Health and Nutrition Examination Survey, 2005-2006. 2015. 12:1-6 6 |
| **Anonymous**. Effectiveness of Video Messaging About Diet, Exercise and Weight Gain in Pregnancy in Regional and National Samples. *Clinical Trials.* 2015. |
| **Anonymous**. Effects of a Physical Exercise Program on Microcirculation and Pregnancy Outcomes in Obese Pregnant Women. *Clinical Trials.* 2015. |
| **Anonymous**. Effects on postpartum weight retention after antenatal lifestyle intervention - a secondary analysis of a randomized controlled trial. *Acta Obstet.Gynecol.Scand.* 2016. 95:999-1007 |
| **Anonymous**. Exercise in pregnancy does not increase preterm birth risk. *Clinical Advisor.* 2016. 19:16 |
| **Anonymous**. Exercise in Pregnancy Evaluative Controlled Study. *Clinical Trials.* 2015. |
| **Anonymous**. Exercise Training in Pregnancy for Obese Mothers. *Clinical Trials.* 2010. |
| **Anonymous**. Fit For Delivery: A Study of the Effect of Exercise Sessions and Nutritional Counselling on Pregnancy Outcome. *Clinical Trials.* 2009. |
| **Anonymous**. Fitness programs benefit mothers-to-be, heart patients. *Health Prog.* 1985. 66:74-75 |
| **Anonymous**. Maternal condition and exercise during pregnancy benefit the unborn well being and labor. 2008. 26:51-58 8 |
| **Anonymous**. Pelvic floor muscle exercises. 2001. 87:650 |
| **Anonymous**. Pregnant women advised to consider exercise risks. (Les femmes enceintes doivent prendre en compte les dangers du sport). *Physician & Sportsmedicine.* 1982. 10:27 |
| **Anonymous**. Pregnant women who swim at reduced risk of preterm birth. *Nursing Standard.* 2010. 24:17 |
| **Anonymous**. Role of Maternal Physical Exercise on Spontaneous Labor Onset. *Clinical Trials.* 2015. |
| **Anonymous**. What is the effect of regular group exercise on maternal psychological outcomes and common pregnancy complaints? An assessor blinded RCT. 2016. 32:81-86 6 |
| **Arati Mahishale and Shobhana Patted.** Effectiveness of Tailor Made Exercise Intervention for Low Back Pain and Pelvic Pain during Pregnancy - A Randomized Controlled Trial. 2014. 8:143-148 6 |
| **Avaya Banerjee, V. Mahalakshmi and R. Baranitharan.** Effect of Antenatal Exercise Program with and without Abdominal Strengthening Exercises on Diastasis Rectus Abdominis - A Post Partum Follow Up. 2013. 7:123-126 4 |
| **B. A. Lewis, B. C. Martinson, N. E. Sherwood and M. D. Avery.** A pilot study evaluating a telephone-based exercise intervention for pregnant and postpartum women. *J.Midwifery Womens Health.* 2011. 56:127-131 |
| **B. A. Meyer and J. R. Daling.** Activity level of mother's usual occupation and low infant birth weight. *Journal of Occupational Medicine.* 1985. 27:841-847 |
| **B. A. Polley, R. R. Wing and C. J. Sims.** Randomized controlled trial to prevent excessive weight gain in pregnant women. 2002. 26:1494-1502 |
| **B. B. Price, S. B. Amini and K. Kappeler.** Exercise in pregnancy: effect on fitness and obstetric outcomes-a randomized trial. *Medicine & Science in Sports & Exercise.* 2012. 44:2263-2269 |
| **B. Banerjee, T. K. Dey and P. Chatterjee.** Estimation of risk of pregnancy wastage due to lifting of heavy weight during pregnancy. *Indian Journal of Occupational and Environmental Medicine.* 2002. 6:13-15 |
| **B. Banerjee, T. K. Dey and P. Chatterjee.** Work related physical exertion and spontaneous abortion. *Indian J.Public Health.* 2005. 49:248-249 |
| **B. Bennett and O. D. Ratnoff.** Changes in antihemophilic factor (AHF, factor 8) procoagulant activity and AHF-like antigen in normal pregnancy, and following exercise and pneumoencephalography. *J.Lab.Clin.Med.* 1972. 80:256-263 |
| **B. Chakaravertty, K. Parkavi, S. A. Coumary and A. J. Felix.** Antepartum cardiorespiratory fitness (CRF) quantification by estimation of maximal oxygen consumption (Vo2 max) in pregnant South Indian women. 2012. 110:214-217 |
| **B. Eskenazi, L. Fenster, S. Wight, P. English, G. C. Windham and S. H. Swan.** Physical exertion as a risk factor for spontaneous abortion. 1994. 5:6-13 |
| **B. Feiner, R. Weksler, G. Ohel and S. Degani.** The influence of maternal exercise on placental blood flow measured by Simultaneous Multigate Spectral Doppler Imaging (SM-SDI). *Ultrasound in Obstetrics & Gynecology.* 2000. 15:498-501 |
| **B. G. Armstrong, A. D. Nolin and A. D. McDonald.** PMC1009753; Work in pregnancy and birth weight for gestational age. *Br.J.Ind.Med.* 1989. 46:196-199 |
| **B. Hackley, H. P. Kennedy, D. C. Berry and G. D. Melkus.** A mixed-methods study on factors influencing prenatal weight gain in ethnic-minority women. 2014. 59:388-398 |
| **B. L. Rooney, C. W. Schauberger and M. A. Mathiason.** Impact of perinatal weight change on long-term obesity and obesity-related illnesses. 2005. 106:1349-1356 |
| **B. Laraia, L. Messer, K. Evenson and J. S. Kaufman.** PMC2232039; Neighborhood factors associated with physical activity and adequacy of weight gain during pregnancy. *Journal of Urban Health.* 2007. 84:793-806 |
| **B. Longo-Mbenza, K. B. Tshimanga, B. Buassa-bu-Tsumbu and M. J. Kabangu.** Diets rich in vegetables and physical activity are associated with a decreased risk of pregnancy induced hypertension among rural women from Kimpese, DR Congo. *Nigerian Journal of Medicine: Journal of the National Association of Resident Doctors of Nigeria.* 2008. 17:265-269 |
| **B. Melton, E. Marshall, H. Bland, M. Schmidt and W. K. Guion.** American rural women's exercise self-efficacy and awareness of exercise benefits and safety during pregnancy. 2013. 15:468-473 |
| **B. Neme, I. Behle and A. U. Dos Santos.** Effects of exercise test on the fetal heart in pregnancies complicated by hypertensive syndrome. Portuguese]. *Maternidade e Infancia.* 1973. 32:323-330 |
| **B. Richardson, K. Campbell, L. Carmichael and J. Patrick.** Effects of external physical stimulation on fetuses near term. *Obstet.Gynecol.* 1981. 139:344-352 |
| **B. S. Fjeldsoe, Y. D. Miller and A. L. Marshall.** MobileMums: a randomized controlled trial of an SMS-based physical activity intervention. 2010. 39:101-111 |
| **B. Sandstrom.** Adjustments of the circulation to orthostatic reaction and physical exercise during the first trimester of primipregnancy. 1974. 53:1-5 |
| **B. Sangsawang and N. Sangsawang.** Is a 6-week supervised pelvic floor muscle exercise program effective in preventing stress urinary incontinence in late pregnancy in primigravid women?: a randomized controlled trial. *European Journal of Obstetrics, Gynecology, & Reproductive Biology.* 2016. 197:103-110 |
| **B. Sangsawang and Y. Serisathien.** Effect of pelvic floor muscle exercise programme on stress urinary incontinence among pregnant women. *J.Adv.Nurs.* 2012. 68:1997-2007 |
| **B. Sternfeld, C. P. Quesenberry, B. Eskenazi and L. A. Newman.** Exercise during pregnancy and pregnancy outcome. / Pratique de l ' exercice physique pendant la grossesse et son incidence sur la grossesse. *Medicine & Science in Sports & Exercise.* 1995. 27:634-640 |
| **B. W. Alderman, H. Zhao, V. L. Holt, D. H. Watts and S. A. A. Beresford.** Maternal physical activity in pregnancy and infant size for gestational age. *Ann.Epidemiol.* 1998. 8:513-519 |
| **Brad Schoenfeld and Gul Tiryaki-Sonmez.** Overcoming Psychosocial Barriers to Maternal Exercise: Intervention Strategies to Improve Participation and Adherence. 2011. 3:61-66 |
| **Brazil University of Campinas.** Physical Exercise Influence Among Overweight and Obese Pregnant Women. 2010. |
| **C. A. Collings, L. B. Curet and J. P. Mullin.** Maternal and fetal responses to a maternal aerobic exercise program. *American Journal of Obstetrics & Gynecology.* 1983. 145:702-707 |
| **C. A. Guzman and R. Caplan.** Cardiorespiratory response to exercise during pregnancy. *Obstet.Gynecol.* 1970. 108:600-605 |
| **C. A. Guzman, R. Caplan and M. R. Becklake.** Cardiorespiratory response to exercise during pregnancy. 1969. 28:786-& |
| **C. A. Hickey, S. P. Cliver, F. X. Mulvihill, S. F. McNeal, H. J. Hoffman and R. L. Goldenberg.** Employment-related stress and preterm delivery: a contextual examination. 1995. 110:410-418 |
| **C. A. Nielsen, I. Sigsgaard, M. Olsen, M. Tolstrup, B. Danneskiold-Samsoee and J. E. Bock.** Trainability of the pelvic floor. A prospective study during pregnancy and after delivery. 1988. 67:437-440 |
| **C. A. Snapp and S. K. Donaldson.** Gestational diabetes mellitus: physical exercise and health outcomes. 2008. 10:145-155 |
| **C. A. Snijder, T. Brand, V. Jaddoe, et al.** Physically demanding work, fetal growth and the risk of adverse birth outcomes. The Generation R Study. *Occupational & Environmental Medicine.* 2012. 69:543-550 |
| **C. A. Vamos, S. Flory, H. Sun, et al.** Do Physical Activity Patterns Across the Lifecourse Impact Birth Outcomes?. 2015. 19:1775-1782 |
| **C. A. Vinter, D. M. Jensen, P. Ovesen, H. Beck-Nielsen and J. S. Jorgensen.** The LiP (Lifestyle in Pregnancy) study: A randomized controlled trial of lifestyle intervention in 360 obese pregnant women. *Diabetes Care.* 2011. 34:2502-2507 |
| **C. Abeysena and P. Jayawardana.** Sleep deprivation, physical activity and low income are risk factors for inadequate weight gain during pregnancy: a cohort study. 2011. 37:734-740 |
| **C. Abeysena, P. Jayawardana and A. Seneviratne Rde.** Effect of psychosocial stress and physical activity on preterm birth: a cohort study. *Journal of Obstetrics & Gynaecology Research.* 2010. 36:260-267 |
| **C. Albright, J. E. Maddock and C. R. Nigg.** Physical activity before pregnancy and following childbirth in a multiethnic sample of healthy women in Hawaii. 2005. 42:95-110 |
| **C. Amezcua-Prieto, P. Lardelli-Claret, R. Olmedo-Requena, J. Mozas-Moreno, A. Bueno-Cavanillas and J. J. Jimenez-Moleon.** Compliance with leisure-time physical activity recommendations in pregnant women. 2011. 90:245-252 |
| **C. B. Eaton, J. Maccani, G. Agha, et al.** Adverse early life exposures and carotid atherosclerosis in midlife: Leap study. *Circulation.* 2014. 129: |
| **C. B. Olsson, L. Nilsson-Wikmar and W. J. Grooten.** Determinants for lumbopelvic pain 6 months postpartum. 2012. 34:416-422 |
| **C. B. Rudra, T. K. Sorensen, D. A. Luthy and M. A. Williams.** A prospective analysis of recreational physical activity and preeclampsia risk. *Med.Sci.Sports Exerc.* 2008. 40:1581-1588 |
| **C. Bish, S. Chu, C. Shapiro-Mendoza, A. Sharma and H. M. Blanck.** Trying to lose or maintain weight during pregnancy -- United States, 2003. 2009. 13:286-292 7 |
| **C. Botkin and C. E. Driscoll.** Maternal aerobic exercise: newborn effects. *Fam.Pract.Res.J.* 1991. 11:387-393 |
| **C. C. D. Perkins, J. M. Pivarnik, N. Paneth and A. D. Stein.** Physical activity and fetal growth during pregnancy. *Obstet.Gynecol.* 2007. 109:81-87 |
| **C. C. M. Röst, J. Jacqueline, A. Kaiser, A. P. Verhagen and B. W. Koes.** Pelvic pain during pregnancy: a descriptive study of signs and symptoms of 870 patients in primary care. 2004. 29:2567-2572 6 |
| **C. Coll, M. Domingues, I. Santos, A. Matijasevich, B. L. Horta and P. C. Hallal.** Changes in Leisure-Time Physical Activity From the Prepregnancy to the Postpartum Period: 2004 Pelotas (Brazil) Birth Cohort Study. *Journal of Physical Activity & Health.* 2016. 13:361-365 |
| **C. Collings and L. B. Curet.** Fetal heart rate response to maternal exercise. *American Journal of Obstetrics & Gynecology.* 1985. 151:498-501 |
| **C. D. Peterson, M. Haas and W. T. Gregory.** A pilot randomized controlled trial comparing the efficacy of exercise, spinal manipulation, and neuro emotional technique for the treatment of pregnancy-related low back pain. 2012. 20:18 |
| **C. de Oliveira, M. A. Lopes, Carla Longo e Pereira, L. and M. Zugaib.** Effects of pelvic floor muscle training during pregnancy. 2007. 62:439-446 |
| **C. Dominguez de Costa, A. Lerdo de Tejada, P. Eisenberg de Smoler, et al.** [Decrease of Ac. 5-HIA excretion in urine induced by exercise in pregnant women]. 1978. 44:347-353 |
| **C. E. Mbada, O. E. Adebayo, A. B. Adeyemi, et al.** Knowledge and Attitude of Nigerian Pregnant Women towards Antenatal Exercise: A Cross-Sectional Survey. 2014. 2014:260539 |
| **C. E. Mbada, O. E. Adebayo, T. O. Awotidebe, et al.** Practice and pattern of antenatal and postnatal exercise among Nigerian women: A cross-sectional study. 2015. 3:93-98 |
| **C. Elliott, S. Houghton and S. Langsford.** The use of visual prompts to increase kegel exercise performance in pregnant women: A case study. 1997. 14:231-235 |
| **C. F. Lee, F. M. Hwang, H. M. Lin, L. K. Chi and L. Y. Chien.** The Physical Activity Patterns of Pregnant Taiwanese Women. *Journal of Nursing Research.* 2016. 24:291-299 |
| **C. F. Lee, I. C. Chiang, F. M. Hwang, L. K. Chi and H. M. Lin.** Using the Theory of Planned Behavior to predict pregnant women's intention to engage in regular exercise. *Midwifery.* 2016. 42:80-86 |
| **C. F. Yan, Y. C. Hung, M. L. Gau and K. C. Lin.** Effects of a stability ball exercise programme on low back pain and daily life interference during pregnancy. *Midwifery.* 2014. 30:412-419 |
| **C. Ferreira, H. Dutra, L. Dias, et al.** Heart rate and blood pressure in response to pelvic floor muscle training during pregnancy. *Int.Urogynecol.J.Pelvic Floor Dysfunct.* 2011. 22:S1471-S1472 |
| **C. Fleten, H. Stigum, P. Magnus and W. Nystad.** Exercise during pregnancy, maternal prepregnancy body mass index, and birth weight. *Obstetrics & Gynecology.* 2010. 115:331-337 |
| **C. G. Dominguez, P. E. De Smoler, J. Armas Dominguez, S. Karchmer and D. Skromne.** Electrocardiography, stress and the third pregnancy trimester]. *Arch.Inst.Cardiol.Mex.* 1976. 46:74-81 |
| **C. H. Chuang, M. R. Stengel, S. W. Hwang, D. Velott, K. H. Kjerulff and J. L. Kraschnewski.** Behaviours of overweight and obese women during pregnancy who achieve and exceed recommended gestational weight gain. 2014. 8:e577-83 |
| **C. H. Ferreira, L. M. Naldoni, S. Ribeiro Jdos, M. C. Meirelles, C. Cavalli Rde and K. Bo.** Maternal blood pressure and heart rate response to pelvic floor muscle training during pregnancy. 2014. 93:678-683 |
| **C. J. Homer, S. A. Beresford, S. A. James, E. Siegel and S. Wilcox.** Work-related physical exertion and risk of preterm, low birthweight delivery. *Paediatr.Perinat.Epidemiol.* 1990. 4:161-174 |
| **C. J. Spaaij, J. M. van Raaij, L. C. de Groot, van der Heijden, L. J., H. A. Boekholt and J. G. Hautvast.** No changes during pregnancy in the net cost of cycling exercise. 1994. 48:513-521 |
| **C. J. Vladutiu, K. R. Evenson and S. W. Marshall.** Physical Activity and Injuries During Pregnancy. *Journal of Physical Activity & Health.* 2010. 7:761-769 |
| **C. Kim, L. N. McEwen, E. C. Kieffer, W. H. Herman and J. D. Piette.** NIHMS614289 PMC4139034; Self-efficacy, social support, and associations with physical activity and body mass index among women with histories of gestational diabetes mellitus. *Diabetes Educ.* 2008. 34:719-728 |
| **C. Kim, M. Draska, M. L. Hess, E. J. Wilson and C. R. Richardson.** NIHMS614297 PMC4139030; A web-based pedometer programme in women with a recent history of gestational diabetes. *Diabetic Med.* 2012. 29:278-283 |
| **C. L. Battle, L. A. Uebelacker, S. R. Magee, K. A. Sutton and I. W. Miller.** NIHMS658326 Available on 03/01/16] PMC4393850 Available on 03/01/16]; Potential for prenatal yoga to serve as an intervention to treat depression during pregnancy. *Womens Health Issues.* 2015. 25:134-141 |
| **C. L. Battle, L. A. Uebelacker, S. R. Magee, K. A. Sutton and I. W. Miller.** Potential for prenatal yoga to serve as an intervention to treat depression during pregnancy. 2015. 25:134-141 |
| **C. L. Butler, M. A. Williams, T. K. Sorensen, I. O. Frederick and W. M. Leisenring.** Relation between maternal recreational physical activity and plasma lipids in early pregnancy. *Am.J.Epidemiol.* 2004. 160:350-359 |
| **C. L. Harrison, C. B. Lombard and H. J. Teede.** PMC4221718; Limiting postpartum weight retention through early antenatal intervention: the HeLP-her randomised controlled trial. *International Journal of Behavioral Nutrition & Physical Activity.* 2014. 11:134 |
| **C. L. Harrison, C. B. Lombard and H. J. Teede.** Understanding early pregnancy health behaviours among overweight and obese women at risk of gestational diabetes mellitus. *Obesity Research and Clinical Practice.* 2011. 5:S27 |
| **C. L. Harrison, C. B. Lombard, B. J. Strauss and H. J. Teede.** Optimizing healthy gestational weight gain in women at high risk of gestational diabetes: a randomized controlled trial. *Obesity.* 2013. 21:904-909 |
| **C. L. Harrison, R. G. Thompson, H. J. Teede and C. B. Lombard.** Measuring physical activity during pregnancy. *International Journal of Behavioral Nutrition and Physical Activity.* 2011. 8: |
| **C. L. Martin and L. R. Brunner Huber.** Physical activity and hypertensive complications during pregnancy: findings from 2004 to 2006 North Carolina Pregnancy Risk Assessment Monitoring System. 2010. 37:202-210 |
| **C. L. Nesler, S. L. Hassett, S. Cary and J. Brooke.** Effects of supine exercise on fetal heart rate in the second and third trimesters. *Am.J.Perinatol.* 1988. 5:159-163 |
| **C. M. Chiarello, L. A. Falzone, K. E. McCaslin, M. N. Patel and K. R. Ulery.** The effects of an exercise program on diastasis recti abdominis in pregnant women [corrected] [published erratum appears in *J womens health phys ther* 2005;29(3):76]. 2005. 29:11-16 6 |
| **C. M. Cottrill, J. M. Kotchen, G. Guthrie and T. Kotchen.** Cardiovascular responses to exercise following adolescent hypertensive pregnancy. *Journal of Adolescent Health Care.* 1980. 1:91-95 |
| **C. M. Devine, C. F. Bove and C. M. Olson.** Continuity and change in women's weight orientations and lifestyle practices through pregnancy and the postpartum period: the influence of life course trajectories and transitional events. 2000. 50:567-582 |
| **C. M. Olson and M. S. Strawderman.** Modifiable behavioral factors in a biopsychosocial model predict inadequate and excessive gestational weight gain. 2003. 103:48-54 |
| **C. M. Olson, M. S. Strawderman, P. S. Hinton and T. A. Pearson.** Gestational weight gain and postpartum behaviors associated with weight change from early pregnancy to 1 y postpartum. *International Journal of Obesity & Related Metabolic Disorders: Journal of the International Association for the Study of Obesity.* 2003. 27:117-127 |
| **C. M. Sampselle, J. M. Miller, B. L. Mims, J. O. Delancey, J. A. Ashton-Miller and C. L. Antonakos.** Effect of pelvic muscle exercise on transient incontinence during pregnancy and after birth. 1998. 91:406-412 |
| **C. Mattocks, A. Ness, K. Deere, et al.** Early life determinants of physical activity in 11 to 12 year olds: cohort study. 2008. 336:26-29 |
| **C. McParlin, S. C. Robson, P. W. G. Tennant, et al.** Objectively measured physical activity during pregnancy: A study in obese and overweight women. *BMC Pregnancy and Childbirth.* 2010. 10: |
| **C. N. Spracklen, K. K. Ryckman, E. W. Triche and A. F. Saftlas.** Physical Activity During Pregnancy and Subsequent Risk of Preeclampsia and Gestational Hypertension: A Case Control Study. *Maternal & Child Health Journal.* 2016. 20:1193-1202 |
| **C. Nav**. Analizando la relación entre el aumento del peso fetal y la realización de ejercicio físico. / exploring the relationship between the fetusweight gain and the practice of physical activity. *Journal of Sport & Health Research.* 2013. 5:319-322 |
| **C. Nobles, B. H. Marcus, E. J. Stanek 3, et al.** NIHMS656730 Available on 05/01/16] PMC4418021 Available on 05/01/16]; Effect of an exercise intervention on gestational diabetes mellitus: a randomized controlled trial. *Obstetrics & Gynecology.* 2015. 125:1195-1204 |
| **C. P. Ribeiro and H. Milanez.** Knowledge, attitude and practice of women in Campinas, Sao Paulo, Brazil with respect to physical exercise in pregnancy: a descriptive study. 2011. 8:31 |
| **C. Pavlou, T. Chard, J. Landon and A. T. Letchworth.** Circulating levels of human placental lactogen in late pregnancy: the effect of glucose loading, smoking and exercise. 1973. 3:45-49 |
| **C. R. Beckmann and C. A. Beckmann.** Effect of a structured antepartum exercise program on pregnancy and labor outcome in primiparas. *J.Reprod.Med.* 1990. 35:704-709 |
| **C. R. Holroyd, N. C. Harvey, S. R. Crozier, et al.** EMS53569 PMC3800076; Placental size at 19 weeks predicts offspring bone mass at birth: findings from the Southampton Women's Survey. *Placenta.* 2012. 33:623-629 |
| **C. Ruissen, W. Jager, M. von Drongelen and H. Hoogland.** The influence of maternal exercise on the pulsatility index of the umbilical artery blood velocity waveform. *European Journal of Obstetrics, Gynecology, & Reproductive Biology.* 1990. 37:1-6 |
| **C. S. Deshpande, A. Rakhshani, R. Nagarathna, et al.** Yoga for high-risk pregnancy: a randomized controlled trial.[Erratum appears in Ann Med Health Sci Res. 2014 Nov;4(6):978 Note: Rakshani, A [corrected to Rakhshani, A]]. 2013. 3:341-344 |
| **C. S. Harrod, L. Chasan-Taber, R. M. Reynolds, et al.** NIHMS600800 Available on 08/01/15] PMC4111108 Available on 08/01/15]; Physical activity in pregnancy and neonatal body composition: the Healthy Start study. *Obstetrics & Gynecology.* 2014. 124:257-264 |
| **C. S. Harrod, L. Chasan-Taber, R. M. Reynolds, et al.** Physical Activity during Pregnancy and Neonatal Fat Mass: The Healthy Start Study. *Diabetes.* 2014. 63:A42 |
| **C. S. Rabkin, H. R. Anderson, J. M. Bland, O. G. Brooke, G. Chamberlain and J. L. Peacock.** Maternal activity and birth weight: a prospective, population-based study. *Am.J.Epidemiol.* 1990. 131:522-531 |
| **C. Savi, G. Milic-Emili and E. De Minicis.** [The physiology of muscullar exercise in women at the termination of pregnancy]. 1959. 58:403-412 |
| **C. Schou Andersen, M. Juhl, M. Gamborg, T. I. Sorensen and E. A. Nohr.** PMC3324144; Maternal Recreational Exercise during Pregnancy in relation to Children's BMI at 7 Years of Age. *International Journal of Pediatrics.* 2012. 2012:920583 |
| **C. Schou Andersen, M. Juhl, M. Gamborg, T. I. Sorensen and E. A. Nohr.** Maternal Recreational Exercise during Pregnancy in relation to Children's BMI at 7 Years of Age. 2012. 2012:920583 |
| **C. Silveira, B. G. Pereira, J. G. Cecatti, S. R. Cavalcante and R. I. Pereira.** PMC2936287; Fetal cardiotocography before and after water aerobics during pregnancy. *Reproductive Health.* 2010. 7:23 |
| **C. Taniguchi and C. Sato.** Home-based walking during pregnancy affects mood and birth outcomes among sedentary women: A randomized controlled trial. *Int.J.Nurs.Pract.* 2016. 7:7 |
| **C. Taves, J. Charteris and J. C. Wall.** The kinematics of treadmill walking during pregnancy. *Physiotherapy Canada.* 1982. 34:321-324 |
| **C. Tragea, G. P. Chrousos, E. C. Alexopoulos and C. Darviri.** A randomized controlled trial of the effects of a stress management programme during pregnancy. 2014. 22:203-211 |
| **C. W. Burnett.** The value of antenatal exercises. 1956. 63:40-57 |
| **C. W. Waage, I. Mdala, A. K. Jenum, T. M. Michelsen, K. I. Birkeland and L. Sletner.** Ethnic differences in blood pressure from early pregnancy to postpartum: a Norwegian cohort study. *J.Hypertens.* 2016. 34:1151-1159 |
| **C. Ward-Ritacco, M. S. Poudevigne and P. J. O'Connor.** Muscle strengthening exercises during pregnancy are associated with increased energy and reduced fatigue. *Journal of Psychosomatic Obstetrics & Gynecology.* 2016. 37:68-72 |
| **C. Wharton and M. J. Benton.** DataBase: research and evaluation results. Resistance exercise decreases the need for insulin in overweight women with gestational diabetes mellitus. *American Journal of Health Promotion.* 2006. 20:441-442 2p |
| **C. Woldringh, M. van den Wijngaart, P. Albers-Heitner, Lycklama a Nijeholt, A. A. and T. Lagro-Janssen.** Pelvic floor muscle training is not effective in women with UI in pregnancy: a randomised controlled trial. 2007. 18:383-390 |
| **C. Wuertz, P. Gilbert, W. Baier and C. Kunz.** Cross-sectional study of factors that influence the 25-hydroxyvitamin D status in pregnant women and in cord blood in Germany. *Br.J.Nutr.* 2013. 110:1895-1902 |
| **C. Y. Yates, L. M. Boylan, R. D. Lewis and J. A. Driskell.** Maternal aerobic exercise and vitamin B-6 status. 1988. 48:117-121 |
| **C. Zhang, C. G. Solomon, J. E. Manson and F. B. Hu.** A prospective study of pregravid physical activity and sedentary behaviors in relation to the risk for gestational diabetes mellitus. *Arch.Intern.Med.* 2006. 166:543-548 |
| **Catherine Kim, Phyllis Brawarsky, Rebecca A. Jackson, Elena Fuentes-Afflick and Jennifer S. Haas.** Changes in health status experienced by women with gestational diabetes and pregnancy-induced hypertensive disorders. 2005. 14:729-736 |
| **Ch Estel and W. Turk.** The influence of a defined physical exercise during pregnancy on the functional values of the maternal cardiovascular system and on fetal heart rate. *Zentralbl.Gynakol.* 1987. 109:929-935 |
| **Cheryl Vamos, Sara Flory, Haichun Sun, et al.** Do Physical Activity Patterns Across the Lifecourse Impact Birth Outcomes?. *Maternal & Child Health Journal.* 2015. 19:1775-1782 8p |
| **Christopher P. Connolly.** Leisure-time physical activity perceptions, influences, and behavior during pregnancy. 2015. 75:No Pagination Specified |
| **Colleen Doyle, Elizabeth Werner, Tianshu Feng, et al.** Pregnancy distress gets under fetal skin: Maternal ambulatory assessment & sex differences in prenatal development. *Dev.Psychobiol.* 2015. 57:607-625 |
| **Corinne Urech, Nadine S. Fink, Irene Hoesli, Frank H. Wilhelm, Johannes Bitzer and Judith Alder.** Effects of relaxation on psychobiological wellbeing during pregnancy: A randomized controlled trial. 2010. 35:1348-1355 |
| **Cuilin Zhang, Deirdre K. Tobias, Jorge E. Chavarro, et al.** Adherence to healthy lifestyle and risk of gestational diabetes mellitus: Prospective cohort study. *BMJ: British Medical Journal Vol 349 Sep 2014, ArtID g5450.* 2014. 349: |
| **Curt L. Lox and Darren C. Treasure.** Changes in feeling states following aquatic exercise during pregnancy. 2000. 30:518-517 |
| **D. C. Hall and D. A. Kaufmann.** Effects of aerobic and strength conditioning on pregnancy outcomes. *American Journal of Obstetrics & Gynecology.* 1987. 157:1199-1203 |
| **D. C. Pinzon, K. Zamora, J. H. Martinez, et al.** Type of delivery and gestational age is not affected by pregnant Latin-American women engaging in vigorous exercise: a secondary analysis of data from a controlled randomized trial. *Revista de Salud Publica.* 2012. 14:731-743 |
| **D. Cannella, M. Lobel and A. Monheit.** Knowing is believing: information and attitudes towards physical activity during pregnancy. 2010. 31:236-242 |
| **D. Da Costa, N. Rippen, M. Dritsa and A. Ring.** Self-reported leisure-time physical activity during pregnancy and relationship to psychological well-being. *Journal of Psychosomatic Obstetrics and Gynecology.* 2003. 24:111-119 |
| **D. Duncombe, H. Skouteris, E. H. Wertheim, L. Kelly, V. Fraser and S. J. Paxton.** Vigorous exercise and birth outcomes in a sample of recreational exercisers: a prospective study across pregnancy. *Aust.N.Z.J.Obstet.Gynaecol.* 2006. 46:288-292 |
| **D. E. Irwin, D. A. Savitz, K. A. St Andre and I. Hertz-Picciotto.** Study of occupational risk factors for pregnancy-induced hypertension among active duty enlisted Navy personnel. 1994. 25:349-359 |
| **D. H. Moore, J. C. Jarrett 2 and P. J. Bendick.** Exercise-induced changes in uterine artery blood flow, as measured by Doppler ultrasound, in pregnant subjects. *Am.J.Perinatol.* 1988. 5:94-97 |
| **D. Hruba, L. Kukla and M. Tyrlik.** Occupational risks for human reproduction: ELSPAC Study. European Longitudinal Study of Pregnancy and Childhood. *Cent.Eur.J.Public Health.* 1999. 7:210-215 |
| **D. J. Taylor, C. H. Thompson, G. J. Kemp, et al.** A relationship between impaired fetal growth and reduced muscle glycolysis revealed by 31P magnetic resonance spectroscopy. *Diabetologia.* 1995. 38:1205-1212 |
| **D. J. Tuffnell, P. C. Buchan, D. Albert and S. Tyndale-Biscoe.** Fetal heart rate responses to maternal exercise, increased maternal temperature and maternal circadian variation. *Journal of Obstetrics and Gynaecology.* 1990. 10:387-391 |
| **D. Jensen and D. E. O'Donnell.** The impact of human pregnancy on perceptual responses to chemoreflex vs. exercise stimulation of ventilation: a retrospective analysis. 2011. 175:55-61 |
| **D. Jensen, K. A. Webb and D. E. O'Donnell.** The increased ventilatory response to exercise in pregnancy reflects alterations in the respiratory control systems ventilatory recruitment threshold for CO2. 2010. 171:75-82 |
| **D. Jensen, K. A. Webb, G. A. Davies and D. E. O'Donnell.** Mechanical ventilatory constraints during incremental cycle exercise in human pregnancy: implications for respiratory sensation. 2008. 586:4735-4750 |
| **D. Jensen, K. A. Webb, G. A. Davies and D. E. O'Donnell.** Mechanisms of activity-related breathlessness in healthy human pregnancy. 2009. 106:253-265 |
| **D. Jensen, K. A. Webb, L. A. Wolfe and D. E. O'Donnell.** Effects of human pregnancy and advancing gestation on respiratory discomfort during exercise. *Respiratory Physiology and Neurobiology.* 2007. 156:85-93 |
| **D. Koniakgriffin.** Aerobic exercise, psychological well-being, and physical discomforts during adolescent pregnancy. *Res.Nurs.Health.* 1994. 17:253-263 |
| **D. L. Barnes, L. S. Adair and B. M. Popkin.** Women's physical activity and pregnancy outcome: a longitudinal analysis from the Philippines. 1991. 20:162-172 |
| **D. Mparmpakas, A. Goumenou, E. Zachariades, G. Pados, Y. Gidron and E. Karteris.** Immune system function, stress, exercise and nutrition profile can affect pregnancy outcome: Lessons from a Mediterranean cohort. 2013. 5:411-418 |
| **D. P. Misra, D. M. Strobino, E. E. Stashinko, D. A. Nagey and J. Nanda.** Effects of physical activity on preterm birth. *Am.J.Epidemiol.* 1998. 147:628-635 |
| **D. R. Di Fabio, C. K. Blomme, K. M. Smith, G. J. Welk and C. G. Campbell.** Adherence to physical activity guidelines in mid-pregnancy does not reduce sedentary time: an observational study. 2015. 12:27 |
| **D. R. Hollingsworth and T. R. Moore.** Postprandial walking exercise in pregnant insulin-dependent (type I) diabetic women: reduction of plasma lipid levels but absence of a significant effect on glycemic control. *American Journal of Obstetrics & Gynecology.* 1987. 157:1359-1363 |
| **D. S. Downs and H. A. Hausenblas.** Pregnant women's third trimester exercise behaviors, body mass index, and pregnancy outcomes. *Psychol.Health.* 2007. 22:545-559 15p |
| **D. S. Downs, G. C. LeMasurier and J. M. DiNallo.** Baby Steps: Pedometer-Determined and Self-Reported Leisure-Time Exercise Behaviors of Pregnant Women. *Journal of Physical Activity & Health.* 2009. 6:63-72 |
| **D. S. Downs, G. C. LeMasurier and J. M. DiNallo.** Baby steps: pedometer-determined and self-reported leisure-time exercise behaviors of pregnant women. 2009. 6:63-72 |
| **D. Symons Downs and J. S. Ulbrecht.** Understanding exercise beliefs and behaviors in women with gestational diabetes mellitus. 2006. 29:236-240 |
| **Danielle A. J. M. Schoenaker, Sabita S. Soedamah-Muthu, Leonie K. Callaway and Gita D. Mishra.** Prepregnancy dietary patterns and risk of developing hypertensive disorders of pregnancy: results from the Australian Longitudinal Study on Women's Health. 2015. 102:94-101 8 |
| **de Smoler Eisenberg, J. Armass-Dominguez, C. Dominguez-Munguia and S. Karchmer.** Maternal exercise and maternal and fetal heart rate]. *Arch.Invest.Med.* 1974. 5:595-602 |
| **de Viñaspre Hernández, Regina Ruiz, Encarnación Rubio Aranda and Concepción Tomás Aznar.** Urinary incontinence and weight changes during pregnancy and post partum: A pending challenge. 2013. 29:e123-9 1 |
| **Debbie M. Smith, Christine Ward, Shareen Forbes, Rebecca M. Reynolds and Fiona C. Denison.** Weight Management Guides for Pregnant Women with a Body Mass index (BMI) Greater than or Equal to 40kg/m[Superscript 2]: A Qualitative Exploration of Their Use in Maternity Care. 2013. 72:216-221 |
| **Deirdre Dlugonski and Robert W. Motl.** Marital status and motherhood: Implications for physical activity. *Women Health.* 2013. 53:203-215 |
| **Denise Maher.** Exercise and Weight Management for the Pregnant Amputee. 2006. 15:24-24 |
| **der Ploeg van, M. N. van Poppel, T. Chey, et al.** The role of pre-pregnancy physical activity and sedentary behaviour in the development of gestational diabetes mellitus. *Journal of Science & Medicine in Sport.* 2011. 14:149-152 4p |
| **Der Wijden Van, Van De Waal, W. Van Mechelen and Van Poppel M.N.M.** The relationship between moderate-to-vigorous intensity physical activity and insulin resistance, insulin-like growth factor (IGF-1)-system 1, leptin and weight change in healthy women during pregnancy and after delivery. *Clin.Endocrinol.(Oxf).* 2015. 82:68-75 |
| **Dominguez De Costa, Eisenberg De Smoler, J. Armas Dominguez and S. Karchmer.** Exercise tests, heart rate and changes in the mother's position. 1977. 42:11-19 |
| **E. A. Beyaz, E. Ozcan, A. Ketenci and M. M. Beyaz.** The effectiveness of pregnancy rehabilitation: Effects on low back pain and calf cramps during pregnancy and pregnancy outcome. 2011. 7:67-74 |
| **E. A. Morris, C. A. McBride, G. J. Badger and I. M. Bernstein.** Prepregnancy blood pressure and history of first trimester loss contribute to birth weight and placental weight. *Reproductive Sciences.* 2015. 22:185A-186A |
| **E. A. Steegers, G. Buunk, R. A. Binkhorst, H. W. Jongsma, P. F. Wijn and P. R. Hein.** The influence of maternal exercise on the uteroplacental vascular bed resistance and the fetal heart rate during normal pregnancy. *European Journal of Obstetrics, Gynecology, & Reproductive Biology.* 1988. 27:21-26 |
| **E. Althuizen, van der Wijden, C. L., W. van Mechelen, J. C. Seidell and M. N. van Poppel.** The effect of a counselling intervention on weight changes during and after pregnancy: a randomised trial. 2013. 120:92-99 |
| **E. Althuizen, van Poppel, M. N. M., J. C. Seidell and W. van Mechelen.** Correlates of absolute and excessive weight gain during pregnancy. 2009. 18:1559-1566 8 |
| **E. Dale, K. M. Mullinax and D. H. Bryan.** Exercise during pregnancy: effects on the fetus. *Canadian Journal of Applied Sport Sciences - Journal Canadien des Sciences Appliquees au Sport.* 1982. 7:98-103 |
| **E. E. Krans and J. C. Chang.** Low-income African American women's beliefs regarding exercise during pregnancy. 2012. 16:1180-1187 |
| **E. F. Magann, S. F. Evans and J. P. Newnham.** Employment, exertion, and pregnancy outcome: assessment by kilocalories expended each day. *American Journal of Obstetrics & Gynecology.* 1996. 175:182-187 |
| **E. F. Magann, S. F. Evans, B. Weitz and J. Newnham.** Antepartum, intrapartum, and neonatal significance of exercise on healthy low-risk pregnant working women. *Obstetrics & Gynecology.* 2002. 99:466-472 |
| **E. Forsum, N. Kabir, A. Sadurskis and K. Westerterp.** Total energy expenditure of healthy Swedish women during pregnancy and lactation. 1992. 56:334-342 |
| **E. Golomer, D. Ducher, G. S. Arfi and R. Sud.** A study of pregnant women while walking and while carrying a weight. French]. *J.Gynecol.Obstet.Biol.Reprod.* 1991. 20:406-412 |
| **E. Golomer, J. S. Arfi, R. Sud, B. Kapitaniak and J. Tomikowski.** Exercise and pregnancy. Study of the change in heart rate in pregnancy when performing standardized moderate exercise]. *J.Gynecol.Obstet.Biol.Reprod.* 1989. 18:295-302 |
| **E. Ha, S. I. Cho, H. Park, et al.** CME article #2: Does standing at work during pregnancy result in reduced infant birth weight?. *Journal of Occupational and Environmental Medicine.* 2002. 44:815-821 |
| **E. Haelterman, S. Marcoux, A. Croteau and M. Dramaix.** Population-based study on occupational risk factors for preeclampsia and gestational hypertension. *Scandinavian Journal of Work, Environment and Health.* 2007. 33:304-317 |
| **E. Heery, A. McConnon, C. C. Kelleher, P. G. Wall and F. M. McAuliffe.** PMC3827496; Perspectives on weight gain and lifestyle practices during pregnancy among women with a history of macrosomia: a qualitative study in the Republic of Ireland. *BMC Pregnancy & Childbirth.* 2013. 13:202 |
| **E. I. Florack, A. E. Pellegrino, G. A. Zielhuis and R. Rolland.** Influence of occupational physical activity on pregnancy duration and birthweight. *Scand.J.Work Environ.Health.* 1995. 21:199-207 |
| **E. I. Florack, G. A. Zielhuis, J. E. Pellegrino and R. Rolland.** Occupational physical activity and the occurrence of spontaneous abortion. 1993. 22:878-884 |
| **E. I. M. Florack, G. A. Zielhuis, J. E. M. C. Pellegrino and R. Rolland.** Occupational physical activity and the occurrence of spontaneous abortion. *Int.J.Epidemiol.* 1993. 22:878-884 |
| **E. J. Crenier and Y. Lambert.** [Influence of pre- and postnatal exercises on the abdominal wall]. 1975. 4:551-556 |
| **E. K. Rousham, P. E. Clarke and H. Gross.** Significant changes in physical activity among pregnant women in the UK as assessed by accelerometry and self-reported activity. *Eur.J.Clin.Nutr.* 2006. 60:393-400 |
| **E. Korpi-Hyovalti, S. Heinonen, U. Schwab, D. E. Laaksonen and L. Niskanen.** Effect of intensive counselling on physical activity in pregnant women at high risk for gestational diabetes mellitus. A clinical study in primary care. *Primary care diabetes.* 2012. 6:261-268 |
| **E. L. LeMoyne, D. Curnier and D. Ellemberg.** Pregnancy and cognition: deficits in inhibition are unrelated to changes in fitness. *Journal of clinical and experimental neuropsychology.* 2014. 36:178-185 |
| **E. L. LeMoyne, D. Curnier and D. Ellemberg.** Pregnancy and cognition: deficits in inhibition are unrelated to changes in fitness. 2014. 36:178-185 |
| **E. L. Rauff and D. S. Downs.** Mediating effects of body image satisfaction on exercise behavior, depressive symptoms, and gestational weight gain in pregnancy. 2011. 42:381-390 |
| **E. M. Alfadhli, E. N. Osman, T. H. Basri, et al.** Gestational diabetes among Saudi women: prevalence, risk factors and pregnancy outcomes. *Annals of Saudi Medicine.* 2015. 35:222-230 |
| **E. M. Ekholm, S. J. Piha, R. U. Erkkola and K. J. Antila.** Autonomic cardiovascular reflexes in pregnancy. A longitudinal study. *Clinical Autonomic Research.* 1994. 4:161-165 |
| **E. Mocevic, S. W. Svendsen, K. T. Joorgensen, P. Frost and J. P. Bonde.** Occupational lifting, fetal death and preterm birth: Findings from the Danish National Birth Cohort using a job exposure matrix. *PLoS ONE.* 2014. 9: |
| **E. Mocevic, S. W. Svendsen, K. T. Joorgensen, P. Frost and J. P. Bonde.** Occupational lifting, fetal death and preterm birth: Findings from the Danish National Birth Cohort using a job exposure matrix. 2014. 9: |
| **E. Nethery, M. Brauer and P. Janssen.** Time-activity patterns of pregnant women and changes during the course of pregnancy. 2009. 19:317-324 |
| **E. O. Im, W. Chee, H. J. Lim, Y. Liu and H. K. Kim.** Midlife women's attitudes toward physical activity. *JOGNN - Journal of Obstetric, Gynecologic, and Neonatal Nursing.* 2008. 37:203-213 |
| **E. Oken, Y. Ning, S. L. Rifas-Shiman, J. S. Radesky, J. W. Rich-Edwards and M. W. Gillman.** Associations of physical activity and inactivity before and during pregnancy with glucose tolerance. 2006. 108:1200-1207 |
| **E. P. Baciuk, R. I. Pereira, J. G. Cecatti, A. F. Braga and S. R. Cavalcante.** PMC2613131; Water aerobics in pregnancy: Cardiovascular response, labor and neonatal outcomes. *Reproductive Health.* 2008. 5:10 |
| **E. P. Durak, L. Jovanovic-Peterson and C. M. Peterson.** Comparative evaluation of uterine response to exercise on five aerobic machines. 1990. 162:754-756 |
| **E. Petrella, M. Malavolti, V. Bertarini, et al.** Gestational weight gain in overweight and obese women enrolled in a healthy lifestyle and eating habits program. *Journal of Maternal-Fetal & Neonatal Medicine.* 2014. 27:1348-1352 |
| **E. Petridou, H. Salvanos, A. Skalkidou, N. Dessypris, M. Moustaki and D. Trichopoulos.** Are there common triggers of preterm deliveries?. 2001. 108:598-604 |
| **E. Rutkowska and C. Lepecka-Klusek.** The role of physical activity in preparing women for pregnancy and delivery in Poland. 2002. 23:919-923 |
| **E. S. Ji and H. R. Han.** The effects of Qi exercise on maternal/fetal interaction and maternal well-being during pregnancy. *JOGNN - Journal of Obstetric, Gynecologic, & Neonatal Nursing.* 2010. 39:310-318 |
| **E. S. Ji and H. R. Han.** The effects of Qi exercise on maternal/fetal interaction and maternal well-being during pregnancy. 2010. 39:310-318 |
| **E. S. Lindholm, M. Norman, C. P. Kilander and D. Altman.** Weight control program for obese pregnant women. *Acta Obstet.Gynecol.Scand.* 2010. 89:840-843 |
| **E. T. Reilly, R. M. Freeman, M. R. Waterfield, A. E. Waterfield, P. Steggles and F. Pedlar.** Prevention of postpartum stress incontinence in primigravidae with increased bladder neck mobility: a randomised controlled trial of antenatal pelvic floor exercises. 2014. 121 Suppl 7:58-66 |
| **E. Thorell and P. Kristiansson.** Pregnancy related back pain, is it related to aerobic fitness? A longitudinal cohort study. 2012. 12:30 |
| **E. Thorell, K. Svardsudd, K. Andersson and P. Kristiansson.** Moderate impact of full-term pregnancy on estimated peak oxygen uptake, physical activity and perceived health. *Acta Obstet.Gynecol.Scand.* 2014. 89:1140-1148 |
| **E. Thorell, L. Goldsmith, G. Weiss and P. Kristiansson.** Physical fitness, serum relaxin and duration of gestation. 2015. 15:168 |
| **E. Tlapáková, K. Jelen and M. Minař**. The relationship between pelvis inclination, exercise and low back pain (LBP) during pregnancy. 2011. 41:15-21 |
| **E. V. Bennett, C. E. McEwen, L. H. Clarke, K. A. Tamminen and P. R. E. Crocker.** 'It's all about modifying your expectations': Women's experiences with physical activity during pregnancy. 2013. 5:267-286 |
| **E. V. Espel, L. M. Glynn, C. A. Sandman and E. P. Davis.** PMC4244187; Longer gestation among children born full term influences cognitive and motor development. *PLoS ONE Electronic Resource].* 2014. 9:e113758 |
| **E. V. Tyldum, P. R. Romundstad and S. A. Slordahl.** Pre-pregnancy physical activity and preeclampsia risk: a prospective population-based cohort study. *Acta Obstet.Gynecol.Scand.* 2010. 89:315-320 |
| **E. W. Reid, J. A. McNeill, F. A. Alderdice, M. A. Tully and V. A. Holmes.** Physical activity, sedentary behaviour and fetal macrosomia in uncomplicated pregnancies: a prospective cohort study. *Midwifery.* 2014. 30:1202-1209 |
| **E. Weallens, A. Clark, P. MacIntyre and M. Gaudoin.** A survey of exercise patterns in primigravidae at a Scottish NHS trust: More consistent support and advice required for women and their families. *Health Educ.J.* 2003. 62:234-245 |
| **E. Wergeland, K. Strand and P. E. Bordahl.** Strenuous working conditions and birthweight, Norway 1989. *Acta Obstet.Gynecol.Scand.* 1998. 77:263-271 |
| **E. White, J. Pivarnik and K. Pfeiffer.** Resistance training during pregnancy and perinatal outcomes. *Journal of Physical Activity & Health.* 2014. 11:1141-1148 |
| **E. Y. Wong, R. Ray, D. L. Gao, et al.** Physical activity, physical exertion, and miscarriage risk in Women textile Workers in Shanghai, china. *Am.J.Ind.Med.* 2010. 53:497-505 |
| **E. Zaharieva.** Olympic participation by women. Effects on pregnancy and childbirth. *JAMA.* 1972. 221:992-995 |
| **El Metwalli, A. G. A., A. M. Badawy, L. A. El Baghdadi and A. El Wehady.** Occupational physical activity and pregnancy outcome. *European Journal of Obstetrics Gynecology and Reproductive Biology.* 2001. 100:41-45 |
| **Elaine S. Marshall, Bridget Melton, Helen Bland and Jacquelyn Nagle.** Physical Activity and Muscular Strengthening in Pregnancy: A Rural Urban Comparison. 2013. 13:50-65 16 |
| **Eman Mohammed Alfadhli, Eman Naguib Osman, Taghreed Hamza Basri, et al.** Gestational diabetes among Saudi women: prevalence, risk factors and pregnancy outcomes. *Annals of Saudi Medicine.* 2015. 35:222-230 |
| **Erica P. Gunderson, Charles P. Quesenberry Jr., Cora E. Lewis, et al.** Development of Overweight Associated with Childbearing Depends on Smoking Habit: The Coronary Artery Risk Development in Young Adults (CARDIA) Study. 2004. 12:2041-2053 |
| **F. Aliaga-Martinez, E. Prats-Ribera, M. Alsina-Hlipolito and A. Allepuz-Palau.** Impact on the function of the pelvic floor muscles of a specific training program included in the routine monitoring of pregnancy and postpartum non-randomized controlled trial. Spanish]. *Matronas Profesion.* 2013. 14:36-44 |
| **F. Doran and A. P. O'Brien.** A brief report of attitudes towards physical activity during pregnancy. *Health Promotion Journal of Australia.* 2007. 18:155-158 |
| **F. Doran and K. Davis.** Factors that influence physical activity for pregnant and postpartum women and implications for primary care. *Australian Journal of Primary Health.* 2011. 17:79-85 |
| **F. Doran.** Gestational diabetes mellitus: Perspectives on lifestyle changes during pregnancy and post-partum, physical activity and the prevention of future type 2 diabetes. 2008. 14:85-92 |
| **F. Ebrahimi, Z. M. Shariff, S. Z. Tabatabaei, M. S. Fathollahi, C. Y. Mun and M. Nazari.** Relationship between sociodemographics, dietary intake, and physical activity with gestational weight gain among pregnant women in Rafsanjan City, Iran. 2015. 33:168-176 |
| **F. K. Lotgering, A. van den Berg, P. C. Struijk and H. C. Wallenburg.** Arterial pressure response to maximal isometric exercise in pregnant women. 1992. 166:538-542 |
| **F. K. Lotgering, M. B. van Doorn, P. C. Struijk, J. Pool and H. C. Wallenburg.** Maximal aerobic exercise in pregnant women: heart rate, O2 consumption, CO2 production, and ventilation. 1991. 70:1016-1023 |
| **F. K. Lotgering, P. C. Struijk, M. B. van Doorn, W. E. Spinnewijn and H. C. Wallenburg.** Anaerobic threshold and respiratory compensation in pregnant women. 1995. 78:1772-1777 |
| **F. M. Doran and N. A. Buckley.** Walking patterns in pregnancy. *Australian Journal of Primary Health.* 2013. 19:213-218 |
| **F. M. Kovacs, E. Garcia, A. Royuela, L. Gonzalez, V. Abraira and Spanish Back Pain Research, Network.** Prevalence and factors associated with low back pain and pelvic girdle pain during pregnancy: a multicenter study conducted in the Spanish National Health Service. 2012. 37:1516-1533 |
| **F. Mohammadi, J. Malakooti, J. Babapoor and S. Mohammad-Alizadeh-Charandabi.** The effect of a home-based exercise intervention on postnatal depression and fatigue: A randomized controlled trial. 2015. 21:478-485 |
| **F. Momeni Javid, M. Simbar, M. Dolatian and H. Alavi Majd.** Comparison of lifestyles of women with gestational diabetes and healthy pregnant women. *Global Journal of Health Science.* 2015. 7:162-169 |
| **F. Nasiri-Amiri, A. Bakhtiari, M. Faramarzi, H. Adib Rad and H. Pasha.** The Association Between Physical Activity During Pregnancy and Gestational Diabetes Mellitus: A Case-Control Study. *International Journal of Endocrinology and Metabolism.* 2016. 14:e37123 |
| **F. O. Omokhodion, M. O. Onadeko, O. A. Roberts, J. R. Beach, I. Burstyn and N. M. Cherry.** Paid work, domestic work, and other determinants of pregnancy outcome in Ibadan, southwest Nigeria. *International Journal of Gynaecology & Obstetrics.* 2010. 111:165-170 |
| **F. P. McCarthy, A. S. Khashan, D. Murray, et al.** Parental physical and lifestyle factors and their association with newborn body composition. *BJOG: An International Journal of Obstetrics and Gynaecology.* 2016. 123:1824-1829 |
| **F. Sehati Shafayi, M. Akef, H. Sadegi and A. Sallakh Niknazhad.** PMC3825354; A Comparison of Physical Activity and Nutritional Practices in Hypertensive and Non- hypertensive Pregnant Women. *Journal of Cardiovascular & Thoracic Research.* 2012. 4:53-56 |
| **F. Shobeiri and K. Begum.** Physical activity and pregnancy outcome among Indian women belonging to high socioeconomic families. *Journal of Postgraduate Medical Institute.* 2005. 19:125-129 |
| **Fahimeh Sehati Shafayi, Maryam Akef, Homayoon Sadegi and Akram sallakh Niknazhad.** A Comparison of Physical Activity and Nutritional Practices in Hypertensive and Non- hypertensive Pregnant Women. 2012. 4:53-56 4 |
| **Fernandes da Mota, P. G., A. G. Pascoal, A. I. Carita and K. Bo.** Prevalence and risk factors of diastasis recti abdominis from late pregnancy to 6 months postpartum, and relationship with lumbo-pelvic pain. 2015. 20:200-205 |
| **G. A. Dumas, J. G. Reid, L. A. Wolfe, M. P. Griffin and M. J. McGrath.** Exercise, posture, and back pain during pregnancy. Part 1. Exercise and posture. 1995. 10:98-103 |
| **G. A. Dumas, J. G. Reid, L. A. Wolfe, M. P. Griffin and M. J. McGrath.** Exercise, posture, and back pain during pregnancy. Part 2. Exercise and back pain. 1995. 10:104-109 |
| **G. A. Hackett, T. Cohen-Overbeek and S. Campbell.** The effect of exercise on uteroplacental Doppler waveforms in normal and complicated pregnancies. *Obstetrics & Gynecology.* 1992. 79:919-923 |
| **G. Ahlborg Jr.** Physical work load and pregnancy outcome. 1995. 37:941-944 |
| **G. C. Di Renzo, I. Giardina, A. Rosati, et al.** Maternal risk factors for preterm birth: a country-based population analysis. *European Journal of Obstetrics, Gynecology, & Reproductive Biology.* 2011. 159:342-346 |
| **G. Candido, T. Lo and P. A. Janssen.** Risk factors for diastasis of the recti abdominis. 2005. 49-54 6 |
| **G. Cito, S. Luisi, A. Mezzesimi, C. Cavicchioli, G. Calonaci and F. Petraglia.** Maternal position during non-stress test and fetal heart rate patterns. 2005. 84:335-338 |
| **G. Cuco, V. Arija, R. Iranzo, J. Vila, M. T. Prieto and J. Fernandez-Ballart.** Association of maternal protein intake before conception and throughout pregnancy with birth weight. 2006. 85:413-421 |
| **G. Eriksen, M. Wohlert, V. Ersbak, L. Hvidman, M. Hedegaard and K. Skajaa.** Placental abruption. A case-control investigation. 1991. 98:448-452 |
| **G. Jans, L. Ameye, C. Matthys, et al.** Does lifestyle coaching affect diet and physical activity stage of change scores in obese pregnant women? Pilot observations from the European DALI project. *Obesity Facts.* 2014. 7:132 |
| **G. Laura, L. Gianfranco and G. Donatella.** Pelvic floor muscle training during pregnancy to prevent urinary pelvic floor dysfunctions. *Neurourol.Urodyn.* 2010. 29:64-65 |
| **G. Lee, S. Challenger, M. McNabb and M. Sheridan.** A randomised controlled trial on exercise in pregnancy. 1996. |
| **G. M. Dado, P. B. Dobrin and R. S. Mrkvicka.** Venous flow through coiled and noncoiled umbilical cords. Effects of external compression, twisting and longitudinal stretching. *J.Reprod.Med.* 1997. 42:576-580 |
| **G. M. Egeland, K. Klungsoyr, N. Oyen, G. S. Tell, O. Naess and R. Skjaerven.** Preconception cardiovascular risk factor differences between gestational hypertension and preeclampsia: Cohort Norway study. *Hypertension.* 2016. 67:1173-1180 |
| **G. N. Bedell and R. W. Adams.** Pulmonary Diffusing Capacity during Rest and Exercise. A Study of Normal Persons and Persons with Atrial Septal Defect, Pregnancy, and Pulmonary Disease. 1962. 41:1908-1914 |
| **G. Nagel, M. Wabitsch, C. Galm, et al.** Determinants of obesity in the Ulm Research on Metabolism, Exercise and Lifestyle in Children (URMEL-ICE). 2009. 168:1259-1267 |
| **G. Ramirez, R. M. Grimes, J. F. Annegers, B. R. Davis and C. H. Slater.** Occupational physical-activity and other risk-factors for preterm birth among united-states-army primigravidas. *Am.J.Public Health.* 1990. 80:728-729 |
| **G. Risvas, I. Papaioannou, D. B. Panagiotakos, P. Farajian, V. Bountziouka and A. Zampelas.** Perinatal and family factors associated with preadolescence overweight/obesity in Greece: the GRECO study. 2012. 2:145-153 |
| **G. S. Berkowitz, J. L. Kelsey, T. R. Holford and R. L. Berkowitz.** Physical activity and the risk of spontaneous preterm delivery. *J.Reprod.Med.* 1983. 28:581-588 |
| **G. S. Berkowitz.** An epidemiologic study of preterm delivery. 1981. 113:81-92 |
| **G. Torres-Luque, L. Torres-Luque, S. Garc**. Seguimiento de un programa de actividad f. 2012. 11:84-92 |
| **G. Varrassi, C. Bazzano and W. T. Edwards.** Effects of physical activity on maternal plasma beta-endorphin levels and perception of labor pain. 1989. 160:707-712 |
| **G. Xu, Y. Wu, L. Yang, et al.** Risk factors for early miscarriage among Chinese: a hospital-based case-control study. *Fertility & Sterility.* 2014. 101:1663-1670 |
| **G. Zhao, E. S. Ford, J. Tsai, et al.** Trends in health-related behavioral risk factors among pregnant women in the United States: 2001-2009. 2012. 21:255-263 |
| **Gema Torres-Luque, Luc**. Empleo del poms durante un programa de actividad física en el medio acuático para mujeres embarazadas. / use of the poms during a physical activity program in aquatic environment for pregnant women. 2010. 10:37-45 |
| **Glasgow University of, Scottish Collaboration for Public Health, Research and Policy.** Mellow Bumps RCT - Antenatal Intervention for Vulnerable Women. 2013. |
| **Guglielmina Fantuzzi, Elena Righi and Gabriella Aggazzotti.** A Case-Control Study on Leisure Time Physical Activity (LTPA) during the Last Three Months of Pregnancy and Foetal Outcomes in Italy. *Health (1949-4998).* 2016. 8:133-143 11p |
| **H. A. Hausenblas, B. W. Brewer, J. L. Van Raalte, et al.** Development and evaluation of a multimedia CD-ROM for exercise during pregnancy and postpartum. 2008. 70:215-219 |
| **H. Baumann, A. Huch and R. Huch.** Doppler sonographic evaluation of exercise-induced blood flow velocity and waveform changes in fetal, uteroplacental and large maternal vessels in pregnant women. *J.Perinat.Med.* 1989. 17:279-287 |
| **H. C. Ostgaard, G. Zetherstrom, E. Roos-Hansson and B. Svanberg.** Reduction of back and posterior pelvic pain in pregnancy. 1994. 19:894-900 |
| **H. Cramer, J. Frawley, A. Steel, et al.** Characteristics of women who practice yoga in different locations during pregnancy. 2015. 5:e008641 |
| **H. D. Junge.** Behavioral states and state related heart rate and motor activity patterns in the newborn infant and the fetus antepartum -- a comparative study. I. Technique, illustration of recordings, and general results. 1979. 7:85-107 |
| **H. D. Junge.** Behavioral states and state-related heart rate and motor activity patterns in the newborn infant and the fetus ante partum. A comparative study. III. Analysis of sleep state-related motor activity patterns. 1980. 10:239-246 |
| **H. Dahlstrom and K. Ihrman.** A clinical and physiological study of pregnancy in a material from northern Sweden. V. The results of work tests during and after pregnancy. 1960. 65:305-314 |
| **H. E. Harris, G. T. Ellison and S. Clement.** Do the psychosocial and behavioral changes that accompany motherhood influence the impact of pregnancy on long-term weight gain?. 1999. 20:65-79 |
| **H. Elden, H. Hagberg, M. F. Olsen, L. Ladfors and H. C. Ostgaard.** Regression of pelvic girdle pain after delivery: follow-up of a randomised single blind controlled trial with different treatment modalities. 2008. 87:201-208 |
| **H. Elden, H. Ostgaard, M. Fagevik-Olsen, L. Ladfors and H. Hagberg.** Treatment of pelvic girdle pain in pregnant women: adverse effects of standard treatment, acupuncture and stabilising exercises on the pregnancy, mother, delivery and the fetus/neonate. *BMC Complementary & Alternative Medicine.* 2008. 8:13p-13p 1p |
| **H. Elden, L. Ladfors, M. F. Olsen, H. C. Ostgaard and H. Hagberg.** Effects of acupuncture and stabilising exercises as adjunct to standard treatment in pregnant women with pelvic girdle pain: randomised single blind controlled trial. 2005. 330:761 |
| **H. G. Knuttgen and K. Emerson Jr.** Physiological response to pregnancy at rest and during exercise. *J.Appl.Physiol.* 1974. 36:549-553 |
| **H. H. Kim, A. Nava-Ocampo, S. K. Kim, et al.** Is prenatal childbirth preparation effective in decreasing adverse maternal and neonatal response to labor? A nested case-control study. *Acta Bio-Medica de l Ateneo Parmense.* 2008. 79:18-22 |
| **H. Hausenblas, D. S. Downs, P. Giacobbi, D. Tuccitto and B. Cook.** A multilevel examination of exercise intention and behavior during pregnancy. 2008. 66:2555-2561 |
| **H. Hausenblas, P. Giacobbi, B. Cook, R. Rhodes and A. Cruz.** Prospective examination of pregnant and nonpregnant women's physical activity beliefs and behaviours. *Journal of Reproductive and Infant Psychology.* 2011. 29:308-319 |
| **H. Jiang, X. Qian, M. Li, et al.** Can physical activity reduce excessive gestational weight gain? Findings from a Chinese urban pregnant women cohort study. *International Journal of Behavioral Nutrition and Physical Activity.* 2012. 9: |
| **H. K. Hegaard, B. Ottesen, M. Hedegaard, et al.** The association between leisure time physical activity in the year before pregnancy and pre-eclampsia. *Journal of Obstetrics & Gynaecology.* 2010. 30:21-24 |
| **H. K. Hegaard, K. Petersson, M. Hedegaard, et al.** Sports and leisure-time physical activity in pregnancy and birth weight: a population-based study. *Scand.J.Med.Sci.Sports.* 2010. 20:e96-102 |
| **H. K. Hegaard, M. Hedegaard, P. Damm, B. Ottesen, K. Petersson and T. B. Henriksen.** Leisure time physical activity is associated with a reduced risk of preterm delivery. *American Journal of Obstetrics & Gynecology.* 2008. 198:180.e1-180.e5 |
| **H. K. Hegaard, P. Damm, M. Hedegaard, et al.** Sports and leisure time physical activity during pregnancy in nulliparous women. *Maternal & Child Health Journal.* 2011. 15:806-813 |
| **H. Kahyaoglu Sut and P. Balkanli Kaplan.** Effect of pelvic floor muscle exercise on pelvic floor muscle activity and voiding functions during pregnancy and the postpartum period. 2015. |
| **H. Kirkegaard, H. Stovring, K. M. Rasmussen, B. Abrams, T. I. Sorensen and E. A. Nohr.** Maternal weight change from prepregnancy to 7 years postpartum--the influence of behavioral factors. 2015. 23:870-878 |
| **H. Klomp, R. F. Dyck and S. Sheppard.** Description and evaluation of a prenatal exercise program for urban aboriginal women. *Canadian Journal of Diabetes.* 2003. 27:231-238 |
| **H. Kobe, A. Nakai, T. Koshino and T. Araki.** Effect of regular maternal exercise on lipid peroxidation levels and antioxidant enzymatic activities before and after delivery. 2002. 69:542-548 |
| **H. M. Whitford, B. Alder and M. Jones.** A cross-sectional study of knowledge and practice of pelvic floor exercises during pregnancy and associated symptoms of stress urinary incontinence in North-East Scotland. 2007. 23:204-217 |
| **H. Mendieta Zeron, A. Garduno Alanis, P. Montserrat Nava Diaz, J. Guadalupe Santillan Benitez, De La Rosa and G. Conzuelo Rodriguez.** Low activity in pregnancy does not modify neither adiponectin nor leptin serum levels. 2013. 172:773-779 |
| **H. N. Winn, O. Hess, I. Goldstein, F. Wackers and J. C. Hobbins.** Fetal responses to maternal exercise: effect on fetal breathing and body movement. *Am.J.Perinatol.* 1994. 11:263-266 |
| **H. Prapavessis, S. De Jesus, T. Harper, et al.** The effects of acute exercise on tobacco cravings and withdrawal symptoms in temporary abstinent pregnant smokers. 2014. 39:703-708 |
| **H. R. Murphy, K. Kumareswaran, J. M. Allen, et al.** Closed loop insulin delivery protects against nocturnal hypoglycaemia after moderate physical activity in pregnant women with Type 1 diabetes. *Diabetic Med.* 2011. 28:18 |
| **H. Taskinen, P. Kyyronen and K. Hemminki.** Effects of ultrasound, shortwaves, and physical exertion on pregnancy outcome in physiotherapists. 1990. 44:196-201 |
| **H. Taskinen, P. Kyyronen and K. Hemminki.** PMC1060641; Effects of ultrasound, shortwaves, and physical exertion on pregnancy outcome in physiotherapists. *Journal of Epidemiology & Community Health.* 1990. 44:196-201 |
| **H. Volejnikova, K. Janku, M. Cernoch and J. Buzkova.** The influence of exercise on the course of confinement in pregnant woman with cardiopathies. *Rehabilitacia.* 1984. 17:37-40 |
| **H. Y. Yong, Z. Mohd Shariff, S. J. Koo and N. S. Binti Sa'ari.** Pre-pregnancy body mass index, height and physical activity are associated with rate of gestational weight gain among Malaysian mothers. *Journal of Obstetrics & Gynaecology Research.* 2016. 26:26 |
| **Hao-Yuan Chang, Yeur-Hur Lai, Mark P. Jensen, et al.** Factors associated with low back pain changes during the third trimester of pregnancy. 2014. 70:1054-1064 11 |
| **Heather A. Hausenblas and Danielle Symons Downs.** Prospective Examination of Leisure-Time Exercise Behavior During Pregnancy. 2005. 17:240-246 |
| **Heather Jeffcoat.** Perinatal Wellness. Top 5 Pregnancy Exercises for Low Back Pain. 2011. 26:9-10 2 |
| **Helena Andrade Figueira, de Souza Vale, Rodrigo Gomes, Wilma Ferreira Guedes Rodrigues, Alan Andrade Figueira, Joana Andrade Figueira and Estélio Henrique Martin Dantas.** Pregnancy-Related Low Back Pain Relief after Maximum Static Flexibility Program. 2014. 6:2966-2972 7 |
| **Hora Soltani, Alexandra M. S. Duxbury, Madelynne A. Arden, Andy Dearden, Penny J. Furness and Carolyn Garland.** Maternal Obesity Management Using Mobile Technology: A Feasibility Study to Evaluate a Text Messaging Based Complex Intervention during Pregnancy. 2015. 2015:1-10 10 |
| **I. A. Santos, R. Stein, S. C. Fuchs, et al.** Aerobic exercise and submaximal functional capacity in overweight pregnant women: a randomized trial. *Obstetrics & Gynecology.* 2005. 106:243-249 |
| **I. Danielsen, C. Granstrom, D. Rytter, et al.** Does physical activity during pregnancy adversely influence markers of the metabolic syndrome in adult offspring? A prospective study over two decades. *Journal of Epidemiology & Community Health.* 2013. 67:648-654 |
| **I. Esteban-Cornejo, D. Martinez-Gomez, C. Tejero-Gonzalez, et al.** Maternal physical activity before and during the prenatal period and the offspring's academic performance in youth. The UP&DOWN study. *Journal of Maternal-Fetal & Neonatal Medicine.* 2016. 29:1414-1420 |
| **I. Finkelstein, A. C. Kanitz, R. Bgeginski, et al.** Comparison of the rating of perceived exertion and oxygen uptake during exercise between pregnant and non-pregnant women and between water and land-based exercises. *Revista Brasileira de Medicina do Esporte.* 2012. 18:13-16 |
| **I. Finkelstein, P. A. de Figueiredo, C. L. Alberton, R. Bgeginski, R. Stein and L. F. Kruel.** Cardiorespiratory responses during and after water exercise in pregnant and non-pregnant women. *Revista Brasileira de Ginecologia e Obstetricia.* 2011. 33:388-394 |
| **I. Guelinckx, R. Devlieger, P. Mullie and G. Vansant.** Effect of lifestyle intervention on dietary habits, physical activity, and gestational weight gain in obese pregnant women: a randomized controlled trial. *Am.J.Clin.Nutr.* 2010. 91:373-380 |
| **I. K. Brenner, L. A. Wolfe, M. Monga and M. J. McGrath.** Physical conditioning effects on fetal heart rate responses to graded maternal exercise. *Medicine & Science in Sports & Exercise.* 1999. 31:792-799 |
| **I. Kantola, T. Kaila and R. Erkkola.** Acute exercise- and drug-induced potassium shifts during pregnancy. 1994. 208:88-90 |
| **I. Kawabata, A. Nakai, A. Sekiguchi, Y. Inoue and T. Takeshita.** The effect of regular exercise training during pregnancy on postpartum brachial-ankle pulse wave velocity, a measure of arterial stiffness. 2012. 11:489-494 |
| **I. M. Claesson, A. Josefsson, M. Cedergren, et al.** Consumer satisfaction with a weight-gain intervention programme for obese pregnant women. 2008. 24:163-167 |
| **I. M. Claesson, S. Klein, G. Sydsjo and A. Josefsson.** Physical activity and psychological well-being in obese pregnant and postpartum women attending a weight-gain restriction programme. 2014. 30:11-16 |
| **I. Marc, J. Plaisance, C. Rheaume, et al.** Correlates of maternal cardiorespiratory fitness in the early second trimester of pregnancy. *Canadian Journal of Diabetes.* 2011. 35 (2):181-182 |
| **I. N. McIntyre and N. A. Broadhurst.** Effective treatment of low back pain in pregnancy. 1996. 25:S65-7 1 |
| **I. Nygaard, T. Girts, N. H. Fultz, K. Kinchen, G. Pohl and B. Sternfeld.** Is urinary incontinence a barrier to exercise in women?. *Obstet.Gynecol.* 2005. 106:307-314 |
| **I. Raisanen, K. Salminen and T. Laatikainen.** Response of plasma immunoreactive beta-endorphin and corticotropin to isometric exercise in uncomplicated pregnancy and in pregnancy-induced hypertension. 1990. 35:119-124 |
| **I. Rauramo and M. Forss.** Effect of exercise on maternal hemodynamics and placental blood flow in healthy women. *Acta Obstet.Gynecol.Scand.* 1988. 67:21-25 |
| **I. Rauramo, B. Andersson, T. Laatikainen and J. Pettersson.** Stress hormones and placental steroids in physical exercise during pregnancy. *British Journal of Obstetrics & Gynaecology.* 1982. 89:921-925 |
| **I. Rauramo, K. Salminen and T. Laatikainen.** Release of beta-endorphin in response to physical exercise in non-pregnant and pregnant women. 1986. 65:609-612 |
| **I. Rauramo, S. Ilmonen, L. Viinikka and O. Ylikorkala.** Prostacyclin and thromboxane in pregnant and nonpregnant women in response to exercise. 1995. 85:1027-1030 |
| **I. Rauramo.** Effect of short-term physical exercise on foetal heart rate and uterine activity in normal and abnormal pregnancies. *Ann.Chir.Gynaecol.* 1987. 76:274-279 |
| **I. Szeto, D. Ma, F. Liu, et al.** The prevalence of excess weight gain, imbalanced dietary intake, and physical inactivity among pregnant women in urban areas of China. *Obesity Reviews.* 2014. 15:179 |
| **I. Tendais, B. Figueiredo, J. Mota and A. Conde.** Physical activity, health-related quality of life and depression during pregnancy. 2011. 27:219-228 |
| **I. W. Aitken.** Determinants of low birthweight among the Mendi of Sierra Leone: implications for medical and socio-economic strategies. 1990. 33:103-109 |
| **Iii J. F. Clapp and W. Kiess.** Effects of pregnancy and exercise on concentrations of the metabolic markers tumor necrosis factor alpha and leptin. *Obstet.Gynecol.* 2000. 182:300-306 |
| **Iii J. F. Clapp, B. Lopez and R. Harcar-Sevcik.** Neonatal behavioral profile of the offspring of women who continued to exercise regularly throughout pregnancy. *Obstet.Gynecol.* 1999. 180:91-94 |
| **Iii J. F. Clapp, S. Schmidt, A. Paranjape and B. Lopez.** Maternal insulin-like growth factor-I levels (IGF-I) reflect placental mass and neonatal fat mass. *Obstet.Gynecol.* 2004. 190:730-736 |
| **Iii J. F. Clapp.** Diet, exercise, and fete-placental growth. 1997. 260:101-108 |
| **J. A. Carvajal, A. M. Delpiano, M. A. Cuello and J. A. Poblete.** Mechanical stretch increases brain natriuretic peptide production and secretion in the human fetal membranes. *Reproductive Sciences.* 2013. 20:597-604 |
| **J. A. Daniel, C. E. Dikki and W. Ibrahim.** Aerobic dance exercise improves blood glucose level in pregnant women with gestational diabetes mellitus. *African Journal for Physical, Health Education, Recreation & Dance.* 2014. 20:273-281 |
| **J. A. Grisso, D. M. Main, G. Chiu, E. S. Synder and J. H. Holmes.** Effects of physical activity and life-style factors on uterine contraction frequency. *Am.J.Perinatol.* 1992. 9:489-492 |
| **J. A. Leiferman and K. R. Evenson.** The effect of regular leisure physical activity on birth outcomes. *Maternal & Child Health Journal.* 2003. 7:59-64 |
| **J. Bustamante, R. Ramirez-Velez, A. C. D. Aguilar, A. Czerniczyniec and S. Lores-Arnaiz.** Aerobic Exercise Training During Pregnancy Improves Mitochondrial Function In Human Placenta. *Med.Sci.Sports Exerc.* 2012. 44:746-746 |
| **J. C. Dempsey, C. L. Butler, T. K. Sorensen, et al.** A case-control study of maternal recreational physical activity and risk of gestational diabetes mellitus. *Diabetes Research & Clinical Practice.* 2004. 66:203-215 |
| **J. C. Dempsey, T. K. Sorensen, I. M. Lee, et al.** Recreational physical activity during and before pregnancy and risk of gestational diabetes mellitus. *Am.J.Epidemiol.* 2003. 157:S75-S75 |
| **J. C. Dempsey, T. K. Sorensen, M. A. Williams, et al.** Prospective study of gestational diabetes mellitus risk in relation to maternal recreational physical activity before and during pregnancy. *Am.J.Epidemiol.* 2004. 159:663-670 |
| **J. C. Eisenman, M. A. Sarzynski, J. Tucker and K. A. Heelan.** Maternal Prepregnancy Overweight and Offspring Fatness and Blood Pressure: Role of Physical Activity. *Pediatric Exercise Science.* 2010. 22:369-378 |
| **J. C. Jarrett 2 and W. N. Spellacy.** Jogging during pregnancy: an improved outcome?. *Obstetrics & Gynecology.* 1983. 61:705-709 |
| **J. C. Veille, A. E. Bacevice, B. Wilson, J. Janos and H. K. Hellerstein.** Umbilical artery waveform during bicycle exercise in normal pregnancy. *Obstetrics & Gynecology.* 1989. 73:957-960 |
| **J. C. Veille, A. R. Hohimer, K. Burry and L. Speroff.** The effect of exercise on uterine activity in the last eight weeks of pregnancy. *American Journal of Obstetrics & Gynecology.* 1985. 151:727-730 |
| **J. C. Veille, D. W. Kitzman and A. E. Bacevice.** Effects of pregnancy on the electrocardiogram in healthy subjects during strenuous exercise. *Obstet.Gynecol.* 1996. 175:1360-1364 |
| **J. C. Veille, D. W. Kitzman, P. D. Millsaps and P. D. Kilgo.** Left ventricular diastolic filling response to stationary bicycle exercise during pregnancy and the postpartum period. 2001. 185:822-827 |
| **J. C. Veille, H. K. Hellerstein and A. E. Bacevice Jr.** Maternal left ventricular performance during bicycle exercise. 1992. 69:1506-1508 |
| **J. C. Veille, H. K. Hellerstein, B. Cherry and A. E. Bacevice Jr.** Effects of advancing pregnancy on left ventricular function during bicycle exercise. *Am.J.Cardiol.* 1994. 73:609-610 |
| **J. Choi, J. H. Lee, E. Vittinghoff and Y. Fukuoka.** NIHMS743852 Available on 05/01/17] PMC4826820 Available on 05/01/17]; mHealth Physical Activity Intervention: A Randomized Pilot Study in Physically Inactive Pregnant Women. *Maternal & Child Health Journal.* 2016. 20:1091-1101 |
| **J. Delaney.** Participation in sports and exercise during pregnancy. 1995. 10:8-9 2 |
| **J. Dotlic, M. Terzic, D. Babic, et al.** Influence of lifestyle habits and behaviours on quality of life during pregnancy. 2012. 6:3987-3994 |
| **J. E. Martin, A. J. Hure, L. Macdonald-Wicks, R. Smith and C. E. Collins.** Predictors of post-partum weight retention in a prospective longitudinal study. 2014. 10:496-509 |
| **J. Erneszt and L. Szanyi.** Experimentation for determination of the loading capacity of cardiopathic pregnant women with analysis of the carotid pulse curve during pregnancy]. *Minerva Ginecol.* 1972. 24:1-5 |
| **J. F. Clapp 3 and Clapp,James F.,,3rd.** Long-term outcome after exercising throughout pregnancy: fitness and cardiovascular risk. *American Journal of Obstetrics & Gynecology.* 2008. 199:489.e6 |
| **J. F. Clapp 3 and E. L. Capeless.** Neonatal morphometrics after endurance exercise during pregnancy. *American Journal of Obstetrics & Gynecology.* 1990. 163:1805-1811 |
| **J. F. Clapp 3 and K. H. Rizk.** Effect of recreational exercise on midtrimester placental growth. *American Journal of Obstetrics & Gynecology.* 1992. 167:1518-1521 |
| **J. F. Clapp 3 and S. Dickstein.** Endurance exercise and pregnancy outcome. *Medicine & Science in Sports & Exercise.* 1984. 16:556-562 |
| **J. F. Clapp 3, H. Kim, B. Burciu and B. Lopez.** Beginning regular exercise in early pregnancy: effect on fetoplacental growth. *American Journal of Obstetrics & Gynecology.* 2000. 183:1484-1488 |
| **J. F. Clapp 3, H. Kim, B. Burciu, S. Schmidt, K. Petry and B. Lopez.** Continuing regular exercise during pregnancy: effect of exercise volume on fetoplacental growth. *American Journal of Obstetrics & Gynecology.* 2002. 186:142-147 |
| **J. F. Clapp 3, K. D. Little and E. L. Capeless.** Fetal heart rate response to sustained recreational exercise. *American Journal of Obstetrics & Gynecology.* 1993. 168:198-206 |
| **J. F. Clapp 3, K. D. Little and J. A. Widness.** Effect of maternal exercise and fetoplacental growth rate on serum erythropoietin concentrations. *American Journal of Obstetrics & Gynecology.* 2003. 188:1021-1025 |
| **J. F. Clapp 3, K. D. Little, S. Appleby-Wineberg and J. A. Widness.** The effect of regular maternal exercise on erythropoietin in cord blood and amniotic fluid. *American Journal of Obstetrics & Gynecology.* 1995. 172:1445-1451 |
| **J. F. Clapp 3, S. Simonian, B. Lopez, S. Appleby-Wineberg and R. Harcar-Sevcik.** The one-year morphometric and neurodevelopmental outcome of the offspring of women who continued to exercise regularly throughout pregnancy. *American Journal of Obstetrics & Gynecology.* 1998. 178:594-599 |
| **J. F. Clapp 3, W. Stepanchak, J. Tomaselli, M. Kortan and S. Faneslow.** Portal vein blood flow-effects of pregnancy, gravity, and exercise. *American Journal of Obstetrics & Gynecology.* 2000. 183:167-172 |
| **J. F. Clapp 3.** Fetal heart rate response to running in midpregnancy and late pregnancy. *American Journal of Obstetrics & Gynecology.* 1985. 153:251-252 |
| **J. F. Clapp 3.** Morphometric and neurodevelopmental outcome at age five years of the offspring of women who continued to exercise regularly throughout pregnancy. *J.Pediatr.* 1996. 129:856-863 |
| **J. F. Clapp 3.** Oxygen consumption during treadmill exercise before, during, and after pregnancy. *American Journal of Obstetrics & Gynecology.* 1989. 161:1458-1464 |
| **J. F. Clapp 3.** The changing thermal response to endurance exercise during pregnancy. *American Journal of Obstetrics & Gynecology.* 1991. 165:1684-1689 |
| **J. F. Clapp 3.** The course of labor after endurance exercise during pregnancy. *American Journal of Obstetrics & Gynecology.* 1990. 163:1799-1805 |
| **J. F. Clapp 3.** The effects of maternal exercise on early pregnancy outcome. *American Journal of Obstetrics & Gynecology.* 1989. 161:1453-1457 |
| **J. F. Clapp 3rd and E. Capeless.** The VO2max of recreational athletes before and after pregnancy. 1991. 23:1128-1133 |
| **J. F. Clapp 3rd and K. H. Rizk.** Effect of recreational exercise on midtrimester placental growth. 1992. 167:1518-1521 |
| **J. F. Clapp 3rd and W. Kiess.** Effects of pregnancy and exercise on concentrations of the metabolic markers tumor necrosis factor alpha and leptin. 2000. 182:300-306 |
| **J. F. Clapp 3rd, K. D. Little and J. A. Widness.** Effect of maternal exercise and fetoplacental growth rate on serum erythropoietin concentrations. 2003. 188:1021-1025 |
| **J. F. Clapp 3rd.** Maternal heart rate in pregnancy. 1985. 152:659-660 |
| **J. F. Clapp 3rd.** Morphometric and neurodevelopmental outcome at age five years of the offspring of women who continued to exercise regularly throughout pregnancy. 1996. 129:856-863 |
| **J. F. Clapp 3rd.** Oxygen consumption during treadmill exercise before, during, and after pregnancy. 1989. 161:1458-1464 |
| **J. F. Clapp 3rd.** The changing thermal response to endurance exercise during pregnancy. 1991. 165:1684-1689 |
| **J. F. Clapp 3rd.** The effects of maternal exercise on early pregnancy outcome. 1989. 161:1453-1457 |
| **J. F. Clapp and K. D. Little.** Effect of recreational exercise on pregnancy weight gain and subcutaneous fat deposition. *Med.Sci.Sports Exerc.* 1995. 27:170-177 |
| **J. F. Clapp Iii and B. Lopez.** Size at birth, obesity and blood pressure at age five. *Metabolic Syndrome & Related Disorders.* 2007. 5:116-126 |
| **J. F. Clapp, M. Wesley and R. H. Sleamaker.** Thermoregulatory and metabolic responses to jogging prior to and during pregnancy. / Reponses thermoregulatoires et metaboliques au jogging, avant et pendant la grossesse. *Medicine & Science in Sports & Exercise.* 1987. 19:124-130 |
| **J. G. Jelsma, K. M. van Leeuwen, N. Oostdam, et al.** PMC4738738; Beliefs, Barriers, and Preferences of European Overweight Women to Adopt a Healthier Lifestyle in Pregnancy to Minimize Risk of Developing Gestational Diabetes Mellitus: An Explorative Study. *Journal of Pregnancy.* 2016. 2016:3435791 |
| **J. G. Kemp, F. A. Greer and L. A. Wolfe.** Acid-base regulation after maximal exercise testing in late gestation. *J.Appl.Physiol.* 1997. 83:644-651 |
| **J. G. Logan and S. Yeo.** Effects of Stretching Exercise on Heart Rate Variability During Pregnancy. *J.Cardiovasc.Nurs.* 2016. 2:2 |
| **J. Gofin.** The effect on birth weight of employment during pregnancy. *J.Biosoc.Sci.* 1979. 11:259-267 |
| **J. Goy, L. Dodds, M. W. Rosenberg and W. D. King.** Health-risk behaviours: examining social disparities in the occurrence of stillbirth. 2008. 22:314-320 |
| **J. H. Kim, R. J. Roberge and J. B. Powell.** Effect of external airflow resistive load on postural and exercise-associated cardiovascular and pulmonary responses in pregnancy: a case control study. 2015. 15:45 |
| **J. H. Liu, E. J. Mayer-Davis, R. R. Pate, A. E. Gallagher and J. L. Bacon.** Physical activity during pregnancy is associated with reduced fasting insulin--the Pilot Pregnancy and Active Living Study. 2010. 23:1249-1252 |
| **J. Huberty, D. Dinkel, M. W. Beets and J. Coleman.** Describing the use of the internet for health, physical activity, and nutrition information in pregnant women. 2013. 17:1363-1372 |
| **J. J. Newham, A. Wittkowski, J. Hurley, J. D. Aplin and M. Westwood.** Effects of antenatal yoga on maternal anxiety and depression: a randomized controlled trial. *Depress.Anxiety.* 2014. 31:631-640 |
| **J. J. Newham, C. Allan, P. Leahy-Warren, D. Carrick-Sen and F. Alderdice.** Intentions Toward Physical Activity and Resting Behavior in Pregnant Women: Using the Theory of Planned Behavior Framework in a Cross-Sectional Study. *Birth.* 2016. 43:49-57 |
| **J. J. Pomerance, L. Gluck and V. A. Lynch.** Maternal exercise as a screening test for uteroplacental insufficiency. *Obstetrics & Gynecology.* 1974. 44:383-387 |
| **J. J. Pomerance, L. Gluck and V. A. Lynch.** Physical fitness in pregnancy: its effect on pregnancy outcome. *American Journal of Obstetrics & Gynecology.* 1974. 119:867-876 |
| **J. Jurewicz, W. Hanke, T. Makowiec-Dabrowska and J. Kalinka.** Heaviness of the work measured by energy expenditure during pregnancy and its effect on birth weight]. *Ginekol.Pol.* 2006. 77:537-542 |
| **J. Kluge, D. Hall, Q. Louw, G. Theron and D. Grove.** Specific exercises to treat pregnancy-related low back pain in a South African population. 2011. 113:187-191 |
| **J. L. Ersek and L. R. Brunner Huber.** Physical activity prior to and during pregnancy and risk of postpartum depressive symptoms. 2009. 38:556-566 |
| **J. L. Huberty, M. P. Buman, J. A. Leiferman, J. Bushar and M. A. Adams.** Trajectories of objectively-measured physical activity and sedentary time over the course of pregnancy in women self-identified as inactive. *Preventive Medicine Reports.* 2016. 3:353-360 |
| **J. L. Kraschnewski, C. H. Chuang, D. S. Downs, et al.** Association of prenatal physical activity and gestational weight gain: results from the first baby study. 2013. 23:e233-8 |
| **J. Langhoff-Roos, G. Lindmark, E. Kylberg and M. Gebre-Medhin.** Energy intake and physical activity during pregnancy in relation to maternal fat accretion and infant birthweight. *British Journal of Obstetrics & Gynaecology.* 1987. 94:1178-1185 |
| **J. Leiferman, T. Swibas, K. Koiness, J. A. Marshall and A. L. Dunn.** My baby, my move: examination of perceived barriers and motivating factors related to antenatal physical activity. 2011. 56:33-40 |
| **J. Leng, G. Liu, C. Zhang, et al.** Physical activity, sedentary behaviors and risk of gestational diabetes mellitus: a population-based cross-sectional study in Tianjin, China. *European Journal of Endocrinology.* 2016. 174:763-773 |
| **J. Liu, J. N. Laditka, E. J. Mayer-Davis and R. R. Pate.** Does physical activity during pregnancy reduce the risk of gestational diabetes among previously inactive women?. 2008. 35:188-195 |
| **J. Liu, J. N. Laditka, E. Mayer-Davis and R. R. Pate.** Physical activity during pregnancy may reduce risk of gestational diabetes among previously inactive women. *Diabetes.* 2006. 55:A418-A418 |
| **J. Liu, S. N. Blair, Y. Teng, A. R. Ness, D. A. Lawlor and C. Riddoch.** Physical activity during pregnancy in a prospective cohort of British women: results from the Avon longitudinal study of parents and children. 2011. 26:237-247 |
| **J. Lutter.** Fetal outcome of women who ran while pregnant: a preliminary report. *Melpomene Report.* 1984. 3:6-8 |
| **J. M. Catov, R. B. Ness, M. F. Wellons, D. R. Jacobs, J. M. Roberts and E. P. Gunderson.** Prepregnancy lipids related to preterm birth risk: the coronary artery risk development in young adults study. 2010. 95:3711-3718 |
| **J. M. DiNallo, D. S. Downs and G. Le Masurier.** Objectively assessing treadmill walking during the second and third pregnancy trimesters. *Journal of Physical Activity & Health.* 2012. 9:21-28 |
| **J. M. DiNallo, D. S. Downs and G. Le Masurier.** Objectively assessing treadmill walking during the second and third pregnancy trimesters. 2012. 9:21-28 |
| **J. M. DiNallo, G. C. Le Masurier, N. I. Williams and D. S. Downs.** Walking for health in pregnancy: assessment by indirect calorimetry and accelerometry. 2008. 79:28-35 |
| **J. M. Dodd, A. Newman, L. J. Moran, et al.** The effect of antenatal dietary and lifestyle advice for women who are overweight or obese on emotional well-being: the LIMIT randomized trial. *Acta Obstet.Gynecol.Scand.* 2016. 95:309-318 |
| **J. M. Dodd, A. R. Deussen, I. Mohamad, et al.** NIHMS777629 Available on 01/01/17] PMC4859433 Available on 01/01/17]; The effect of antenatal lifestyle advice for women who are overweight or obese on secondary measures of neonatal body composition: the LIMIT randomised trial. *BJOG: An International Journal of Obstetrics & Gynaecology.* 2016. 123:244-253 |
| **J. M. Dodd, C. Cramp, Z. Sui, et al.** The effects of antenatal dietary and lifestyle advice for women who are overweight or obese on maternal diet and physical activity: the LIMIT randomised trial. 2014. 12:161 |
| **J. M. Dodd, R. M. Grivell and J. A. Owens.** Antenatal Dietary and Lifestyle Interventions for Women Who are Overweight or Obese: Outcomes from the LIMIT Randomized Trial. 2014. 3:392-399 |
| **J. M. Kinder, T. T. Jiang, J. M. Ertelt, et al.** NIHMS707202 Available on 07/30/16] PMC4522363 Available on 07/30/16]; Cross-Generational Reproductive Fitness Enforced by Microchimeric Maternal Cells. *Cell.* 2015. 162:505-515 |
| **J. M. Nicklas, L. J. Miller, C. A. Zera, R. B. Davis, S. E. Levkoff and E. W. Seely.** Factors associated with depressive symptoms in the early postpartum period among women with recent gestational diabetes mellitus. 2013. 17:1665-1672 |
| **J. M. Pivarnik, A. D. Stein and J. M. Rivera.** Effect of pregnancy on heart rate/oxygen consumption calibration curves. *Medicine & Science in Sports & Exercise.* 2002. 34:750-755 6p |
| **J. M. Pivarnik, A. D. Stein and J. M. Rivera.** Effect of pregnancy on heart rate/oxygen consumption calibration curves. 2002. 34:750-755 |
| **J. M. Pivarnik, L. M. Mudd, E. E. White, R. A. Schlaff and K. L. Peyer.** Physical activity during pregnancy and offspring characteristics at 8-10 years. *Journal of Sports Medicine & Physical Fitness.* 2014. 54:672-679 |
| **J. M. Pivarnik, M. B. Mauer, N. A. Ayres, B. Kirshon, G. A. Dildy and D. B. Cotton.** Effects of chronic exercise on blood volume expansion and hematologic indices during pregnancy. *Obstetrics & Gynecology.* 1994. 83:265-269 |
| **J. M. Pivarnik, N. A. Ayres, M. B. Mauer, D. B. Cotton, B. Kirshon and G. A. Dildy.** Effects of maternal aerobic fitness on cardiorespiratory responses to exercise. / Effets de la condition aerobie maternelle sur les reponses cardiorespiratoires a l ' exercice. *Medicine & Science in Sports & Exercise.* 1993. 25:993-998 |
| **J. M. Pivarnik, W. Lee and J. F. Miller.** Physiological and perceptual responses to cycle and treadmill exercise during pregnancy. 1991. 23:470-475 |
| **J. M. Pivarnik, W. Lee, J. F. Miller and J. Werch.** Alterations in plasma volume and protein during cycle exercise throughout pregnancy. 1990. 22:751-755 |
| **J. M. Pivarnik, W. Lee, S. L. Clark, D. B. Cotton, H. T. Spillman and J. F. Miller.** Cardiac output responses of primigravid women during exercise determined by the direct Fick technique. *Obstetrics & Gynecology.* 1990. 75:954-959 |
| **J. M. Pivarnik, W. Lee, T. Spillman, S. L. Clark, D. B. Cotton and J. F. Miller.** Maternal respiration and blood-gases during aerobic exercise performed at moderate altitude. *Med.Sci.Sports Exerc.* 1992. 24:868-872 |
| **J. M. Schlütter, I. Kirkegaard, A. S. Ferreira, et al.** The Number of Endovascular Trophoblasts in Maternal Blood Increases Overnight and after Physical Activity: An Experimental Study. *Fetal.Diagn.Ther.* 2015. |
| **J. M. Schlutter, I. Kirkegaard, L. Hatt, B. Christensen, S. Kolvraa and N. Uldbjerg.** The number of fetal cells in maternal blood increases overnight and after exercise. *Prenat.Diagn.* 2012. 32:23 |
| **J. M. Schlutter, L. Hatt, C. Bach, I. Kirkegaard, S. Kolvraa and N. Uldbjerg.** The cell-free fetal DNA fraction in maternal blood decreases after physical activity. *Prenat.Diagn.* 2014. 34:341-344 |
| **J. M. Walsh, C. McGowan, J. Byrne and F. M. McAuliffe.** Prevalence of physical activity among healthy pregnant women in Ireland. 2011. 114:154-155 |
| **J. M. Wright, C. S. Hoffman, M. J. Nieuwenhuijsen and D. A. Savitz.** The Effect of Swimming During Pregnancy on Fetal Growth. *Water Quality Exposure and Health.* 2011. 3:217-223 |
| **J. Marcinkevage, A. Correa, U. Ramakrishnan, A. Sharma, K. M. V. Narayan and G. Umpierrez.** Physical activity behaviors and blood glucose levels during first trimester of pregnancy in Urban black women. *Diabetes.* 2012. 61:A636-A637 |
| **J. Marcinkevage, A. Correa, U. Ramakrishnan, A. Sharma, K. M. Venkat Narayan and G. Umpierrez.** Reducing sedentary behavior and increasing physical activity during pregnancy: A feasibility study. *Diabetes.* 2012. 61:A344 |
| **J. N. Olayiwola, O. C. Irizarry, K. O'Connell and S. Milan.** Living Smart, Living Fit: a patient-centered program to improve perinatal outcomes in a community health center population. 2013. 4:31-35 |
| **J. N. Watts, Y. D. Miller and A. L. Marshall.** Depressive symptoms during pregnancy: Exploring the role of sitting. 2013. 6:36-42 |
| **J. Newham, J. Hurley, A. Wittkowski, J. D. Aplin and M. Westwood.** Initials findings of CALMA study (Can Antenatal Yoga Lower Maternal Anxiety). *Journal of Reproductive and Infant Psychology.* 2011. 29 (3):e29-e30 |
| **J. Newham, M. Westwood, A. Wittkowski and J. Aplin.** Efficacy of yoga in reducing maternal anxiety in pregnancy. *Journal of Reproductive and Infant Psychology.* 2010. 28 (3):e13 |
| **J. Orskou, T. B. Henriksen, U. Kesmodel and N. J. Secher.** Maternal characteristics and lifestyle factors and the risk of delivering high birth weight infants. *Obstetrics & Gynecology.* 2003. 102:115-120 |
| **J. P. Manshande, R. Eeckels, V. Manshande-Desmet and R. Vlietinck.** Rest versus heavy work during the last weeks of pregnancy: influence on fetal growth. *British Journal of Obstetrics & Gynaecology.* 1987. 94:1059-1067 |
| **J. P. Manshande, R. Eeckels, V. Manshande-Desmet and R. Vlietinck.** Rest versus heavy work during the last weeks of pregnancy: influence on fetal growth. 1987. 94:1059-1067 |
| **J. P. Pirhonen, P. G. Lindqvist and K. Marsal.** A longitudinal study of maternal oxygen saturation during short-term submaximal exercise. *Clinical Physiology & Functional Imaging.* 2003. 23:37-41 |
| **J. Parizkova and R. Petrasek.** The impact of daily work load during pregnancy on lipid metabolism in the liver of the offspring. *Bibl.Nutr.Dieta.* 1979. 57-64 |
| **J. Pomeroy, F. Renstrom, A. M. Gradmark, et al.** Maternal physical activity and insulin action in pregnancy and their relationships with infant body composition. 2013. 36:267-269 |
| **J. R. Ruiz, M. Perales, M. Pelaez, C. Lopez, A. Lucia and R. Barakat.** Supervised exercise-based intervention to prevent excessive gestational weight gain: A randomized controlled trial. *Mayo Clin.Proc.* 2013. 88:1388-1397 |
| **J. S. Arfi and G. Peres.** Maternal and fetal heart rates during bicycle ergometer exercise]. *J.Gynecol.Obstet.Biol.Reprod.* 1986. 15:281-286 |
| **J. S. Haas, E. Fuentes-Afflick, A. L. Stewart, et al.** Prepregnancy health status and the risk of preterm delivery. 2005. 159:58-63 |
| **J. S. Savage, D. S. Downs, Y. Dong and D. E. Rivera.** PMC4056194; Control systems engineering for optimizing a prenatal weight gain intervention to regulate infant birth weight. *Am.J.Public Health.* 2014. 104:1247-1254 |
| **J. S. Tavares, A. S. O. Melo, M. M. R. Amorim, et al.** Physical activity patterns in pregnant women attending the family health program of Campina Grande - PB. *Revista Brasileira de Epidemiologia.* 2009. 12:10-19 |
| **J. Smedley, J. M. Jancey, S. Dhaliwal, Y. Zhao, S. M. D. R. Monteiro and P. Howat.** Women's reported health behaviours before and during pregnancy: A retrospective study. 2014. 73:28-40 |
| **J. T. Bambicini, V. C. M. Soares, M. R. D. Zanetti, M. R. Torloni, M. C. Ribeiro and R. Mattar.** Effects of aerobic and resistance exercises on glycemic levels of patients with gestational diabetes: Pilot study. *International Journal of Gynecology and Obstetrics.* 2012. 119:S603 |
| **J. Tinloy, C. H. Chuang, J. Zhu, J. Pauli, J. L. Kraschnewski and K. H. Kjerulff.** NIHMS541362 Available on 01/01/15] PMC3913372 Available on 01/01/15]; Exercise during pregnancy and risk of late preterm birth, cesarean delivery, and hospitalizations. *Womens Health Issues.* 2014. 24:e99-e104 |
| **J. Van Eyck, J. Wladimiroff, M. Noordam, H. Tonge and H. Prechtl.** The blood flow velocity waveform in the fetal descending aorta: Its relationship to fetal behavioural states in normal pregnancy at 37-38 weeks. *Early Hum.Dev.* 1985. 12:137-143 |
| **J. W. Van Hook, P. Gill, T. R. Easterling, B. Schmucker, K. Carlson and T. J. Benedetti.** The hemodynamic effects of isometric exercise during late normal pregnancy. 1993. 169:870-873 |
| **J. W. Vanhook, P. Gill, T. R. Easterling, B. Schmucker, K. Carlson and T. J. Benedetti.** THE HEMODYNAMIC-EFFECTS OF ISOMETRIC-EXERCISE DURING LATE NORMAL-PREGNANCY. 1993. 169:870-873 |
| **J. Zhang and D. A. Savitz.** Exercise during pregnancy among US women. *Ann.Epidemiol.* 1996. 6:53-59 |
| **James J. Newham, Carly Allan, Patricia Leahy-Warren, Debbie Carrick-Sen and Fiona Alderdice.** Intentions toward physical activity and resting behavior in pregnant women: Using the theory of planned behavior framework in a cross-sectional study. *Birth: Issues in Perinatal Care.* 2016. 43:49-57 |
| **Jan Pryor.** Physical and behavioural correlates of 12-month development in small-for-gestational age and appropriately grown infants. 1996. 14:233-242 |
| **Janet Baker.** Developing a care pathway for obese women in pregnancy and beyond. 2011. 19:632-643 12 |
| **Jennifer Guida, Swathy Sundaram and Jenn Leiferman.** Antenatal physical activity: Investigating the effects on postpartum depression. 2012. 4:1276-1286 11 |
| **Jennifer Jones, Jeff Housman and Willis McAleese.** Exercise, nutrition, and weight management during pregnancy. 2010. 25:120-128 |
| **Jihong Liu, Sara Wilcox, Kara Whitaker, Christine Blake and Cheryl Addy.** Preventing excessive weight gain during pregnancy and promoting postpartum weight loss: A pilot lifestyle intervention for overweight and obese African American women. 2015. 19:840-849 |
| **Joellen W. Hawkins, Cynthia S. Aber, Alice Cannan, Christine M. Coppinger and Kathleen O'Brien Rafferty.** Women's reported self-care behaviors during pregnancy. 1998. 19:529-538 |
| **Jonathan Y. Huang, Dodie Arnold, Chun-fang Qiu, Raymond S. Miller, Michelle A. Williams and Daniel A. Enquobahrie.** Association of Serum Vitamin D with Symptoms of Depression and Anxiety in Early Pregnancy. 2014. 23:588-595 8 |
| **Juan Dertkigil San, J. G. Cecatti, M. A. Sarno, S. R. Cavalcante and E. F. Marussi.** Variation in the amniotic fluid index following moderate physical activity in water during pregnancy. *Acta Obstet.Gynecol.Scand.* 2007. 86:547-552 |
| **K. A. Cooper, M. E. O'Neill, S. N. Hunyor and E. S. Boyce.** Hemodynamic responses of trained and sedentary pregnant women to semi-supine cycling. *Journal of Sports Medicine & Physical Fitness.* 1993. 33:203-204 |
| **K. A. Cooper, S. N. Hunyor, E. S. Boyce, M. E. O'Neill and D. B. Frewin.** Fetal heart rate and maternal cardiovascular and catecholamine responses to dynamic exercise. *Aust.N.Z.J.Obstet.Gynaecol.* 1987. 27:220-223 |
| **K. A. Matthews and J. Rodin.** Pregnancy alters blood pressure responses to psychological and physical challenge. *Psychophysiology.* 1992. 29:232-240 |
| **K. A. Salvesen and S. Morkved.** Randomised controlled trial of pelvic floor muscle training during pregnancy. *Br.Med.J.* 2004. 329:378-380 |
| **K. A. Salvesen, S. N. Stafne, T. M. Eggebo and S. Morkved.** Does regular exercise in pregnancy influence duration of labor? A secondary analysis of a randomized controlled trial. *Acta Obstet.Gynecol.Scand.* 2014. 93:73-79 |
| **K. A. Sauder, A. P. Starling, A. L. Shapiro, et al.** NIHMS788628 Available on 05/01/17] PMC4883104 Available on 05/01/17]; Diet, physical activity and mental health status are associated with dysglycaemia in pregnancy: the Healthy Start Study. *Diabetic Med.* 2016. 33:663-667 |
| **K. A. Webb, L. A. Wolfe and M. J. McGrath.** Effects of acute and chronic maternal exercise on fetal heart rate. *J.Appl.Physiol.* 1994. 77:2207-2213 |
| **K. Baptiste-Roberts, P. Ghosh and W. K. Nicholson.** PMC3236988; Pregravid physical activity, dietary intake, and glucose intolerance during pregnancy. *Journal of Women's Health.* 2011. 20:1847-1851 |
| **K. Baptiste-Roberts, P. Ghosh and W. K. Nicholson.** Pregravid physical activity, dietary intake, and glucose intolerance during pregnancy. 2011. 20:1847-1851 |
| **K. Bo and L. A. Haakstad.** Is pelvic floor muscle training effective when taught in a general fitness class in pregnancy? A randomised controlled trial. 2011. 97:190-195 |
| **K. Bo, C. Fleten and W. Nystad.** Effect of antenatal pelvic floor muscle training on labor and birth. 2009. 113:1279-1284 |
| **K. Bo, G. Hilde, J. Staer-Jensen, F. Siafarikas, M. K. Tennfjord and M. E. Engh.** Does general exercise training before and during pregnancy influence the pelvic floor "opening" and delivery outcome? A 3D/4D ultrasound study following nulliparous pregnant women from mid-pregnancy to childbirth. *Br.J.Sports Med.* 2015. 49:196-199 |
| **K. Bø, L. A. H. Haakstad and N. Volder.** Do pregnant women exercise their pelvic floor muscles?. 2007. 18:733-736 |
| **K. Borodulin, K. R. Evenson and A. H. Herring.** PMC2784751; Physical activity patterns during pregnancy through postpartum. *BMC Womens Health.* 2009. 9:32 |
| **K. Borodulin, K. R. Evenson, K. Monda, F. Wen, A. H. Herring and N. Dole.** Physical activity and sleep among pregnant women. 2010. 24:45-52 |
| **K. Broekhuizen, E. Althuizen, M. N. van Poppel, M. Donker and W. van Mechelen.** From theory to practice: intervention fidelity in a randomized controlled trial aiming to optimize weight development during pregnancy. 2012. 13:816-825 |
| **K. C. Vollebregt, H. Wolf, K. Boer, van der Wal, M. F., T. G. Vrijkotte and G. J. Bonsel.** Does physical activity in leisure time early in pregnancy reduce the incidence of preeclampsia or gestational hypertension?. 2010. 89:261-267 |
| **K. Davis, S. H. Goodman, J. Leiferman, M. Taylor and S. Dimidjian.** A randomized controlled trial of yoga for pregnant women with symptoms of depression and anxiety. *Complementary therapies in clinical practice.* 2015. 21:166-172 |
| **K. E. Brett, Z. M. Ferraro, M. Holcik and K. B. Adamo.** Prenatal physical activity and diet composition affect the expression of nutrient transporters and mTOR signaling molecules in the human placenta. *Placenta.* 2015. 36:204-212 |
| **K. E. Joung, K. H. Park, A. Filippaios, F. Dincer, H. Christou and C. S. Mantzoros.** Cord blood irisin levels are positively correlated with birth weight in newborn infants. *Metabolism: Clinical and Experimental.* 2015. 64:1507-1514 |
| **K. E. Lynch, J. R. Landsbaugh, B. W. Whitcomb, P. Pekow, G. Markenson and L. Chasan-Taber.** Physical Activity of Pregnant Hispanic Women. *Am.J.Prev.Med.* 2012. 43:434-439 |
| **K. E. Sørensen and K. G. Børlum.** Fetal heart function in response to short-term maternal exercise. *Br.J.Obstet.Gynaecol.* 1986. 93:310-313 |
| **K. Eliasson, I. Nordlander, B. Larson, M. Hammarstrom and E. Mattsson.** Influence of physical activity on urinary leakage in primiparous women. 2005. 15:87-94 |
| **K. Eliasson, I. Nordlander, E. Mattsson, B. Larson and M. Hammarstrom.** Prevalence of urinary leakage in nulliparous women with respect to physical activity and micturition habits. 2004. 15:149-153 |
| **K. F. Foxcroft, I. J. Rowlands, N. M. Byrne, H. D. McIntyre, L. K. Callaway and Bambino group.** Exercise in obese pregnant women: the role of social factors, lifestyle and pregnancy symptoms. 2011. 11:4 |
| **K. F. Koltyn.** Mood changes in pregnant women following an exercise session and a prenatal information session. 1994. 4:191-195 |
| **K. F. Putnam, L. A. Mueller, E. F. Magann, et al.** Evaluating effects of self-reported domestic physical activity on pregnancy and neonatal outcomes in "stay at home" military wives. *Mil.Med.* 2013. 178:893-898 |
| **K. Fieril, A. Glantz and M. Fagevik Olsen.** Hemodynamic responses to single sessions of aerobic exercise and resistance exercise in pregnancy. *Acta Obstet.Gynecol.Scand.* 2016. 21:21 |
| **K. Gjestland, K. Bo, K. M. Owe and M. Eberhard-Gran.** Do pregnant women follow exercise guidelines? Prevalence data among 3482 women, and prediction of low-back pain, pelvic girdle pain and depression. 2013. 47:515-520 |
| **K. Godfrey, K. Walker-Bone, S. Robinson, et al.** Neonatal bone mass: influence of parental birthweight, maternal smoking, body composition, and activity during pregnancy. *Journal of Bone & Mineral Research.* 2001. 16:1694-1703 |
| **K. H. Paul, M. L. Graham and C. M. Olson.** The web of risk factors for excessive gestational weight gain in low income women. 2013. 17:344-351 |
| **K. Haby, A. Glantz, R. Hanas and A. Premberg.** Mighty Mums - An antenatal health care intervention can reduce gestational weight gain in women with obesity. 2015. 31:685-692 |
| **K. Ihrman.** A clinical and physiological study of pregnancy in a material from northern Sweden. VIII. The effect of physical training during pregnancy on the circulatory adjustment. *Acta Soc.Med.Ups.* 1960. 65:335-347 |
| **K. J. Guelfi and R. E. Halse.** Moderate-intensity exercise affects perceived hunger and fullness but not appetite-related hormones in late pregnancy. 2013. 38:1162-1165 |
| **K. J. Guelfi, C. Wang, J. A. Dimmock, B. Jackson, J. P. Newnham and H. Yang.** PMC4689036; A comparison of beliefs about exercise during pregnancy between Chinese and Australian pregnant women. *BMC Pregnancy & Childbirth.* 2015. 15:345 |
| **K. J. Guelfi, M. J. Ong, P. A. Fournier, et al.** Does supervised home-based exercise during pregnancy reduce the recurrence of gestational diabetes? A randomised controlled trial. *J.Paediatr.Child Health.* 2015. 51:35 |
| **K. Kumareswaran, D. Elleri, J. M. Allen, et al.** Accuracy of continuous glucose monitoring during exercise in type 1 diabetes pregnancy. 2013. 15:223-229 |
| **K. Kumareswaran, D. Elleri, J. M. Allen, et al.** Physical activity energy expenditure and glucose control in pregnant women with type 1 diabetes: is 30 minutes of daily exercise enough?. 2013. 36:1095-1101 |
| **K. L. Kong, C. Campbell, K. Wagner, A. Peterson and L. Lanningham-Foster.** Impact of a walking intervention during pregnancy on post-partum weight retention and infant anthropometric outcomes. *Journal of developmental origins of health and disease.* 2014. 5:259-267 |
| **K. L. Kong, C. G. Campbell, R. C. Foster, A. D. Peterson and L. Lanningham-Foster.** A pilot walking program promotes moderate-intensity physical activity during pregnancy. *Medicine & Science in Sports & Exercise.* 2014. 46:462-471 |
| **K. L. Kong, M. W. Gillman, S. Rifas-Shiman and X. Wen.** Leisure time physical activity before and during mid-pregnancy and offspring adiposity in mid-childhood. *Pediatric Obesity.* 2015. |
| **K. L. Lindsay, C. Heneghan, B. McNulty, L. Brennan and F. M. McAuliffe.** Lifestyle and dietary habits of an obese pregnant cohort. 2015. 19:25-32 |
| **K. L. Lindsay, C. Heneghan, C. A. McGowan, L. Brennan and F. M. McAuliffe.** Lifestyle habits in obese pregnancy: A case-control study. *Archives of Disease in Childhood: Fetal and Neonatal Edition.* 2013. 98: |
| **K. Lagana.** Come bien, camina y no se preocupe--eat right, walk, and do not worry: selective biculturalism during pregnancy in a Mexican American community. 2003. 14:117-124 |
| **K. M. Borodulin, K. R. Evenson, F. Wen, A. H. Herring and A. M. Benson.** NIHMS366602 PMC3319731; Physical activity patterns during pregnancy. *Medicine & Science in Sports & Exercise.* 2008. 40:1901-1908 |
| **K. M. Borodulin, K. R. Evenson, F. Wen, A. H. Herring and A. M. Benson.** Physical activity patterns during pregnancy. 2008. 40:1901-1908 |
| **K. M. Gustafson, L. E. May, H. W. Yeh, S. K. Million and J. J. Allen.** NIHMS474547 PMC3753784; Fetal cardiac autonomic control during breathing and non-breathing epochs: the effect of maternal exercise. *Early Hum.Dev.* 2012. 88:539-546 |
| **K. M. Owe, E. K. Bjelland, B. Stuge, N. Orsini, M. Eberhard-Gran and S. Vangen.** Exercise level before pregnancy and engaging in high-impact sports reduce the risk of pelvic girdle pain: a population-based cohort study of 39 184 women. *Br.J.Sports Med.* 2016. 50:817-822 |
| **K. M. Owe, W. Nystad and K. B.** Correlates of regular exercise during pregnancy: the Norwegian Mother and Child Cohort Study. *Scand.J.Med.Sci.Sports.* 2009. 19:637-645 |
| **K. M. Owe, W. Nystad and K. Bo.** Association between regular exercise and excessive newborn birth weight. *Obstetrics & Gynecology.* 2009. 114:770-776 |
| **K. M. Owe, W. Nystad and K. Bø.** Correlates of regular exercise during pregnancy: The Norwegian Mother and Child Cohort Study. 2009. 19:637-645 |
| **K. M. Owe, W. Nystad, R. Skjaerven, H. Stigum and K. Bo.** Exercise during pregnancy and the gestational age distribution: a cohort study. *Medicine & Science in Sports & Exercise.* 2012. 44:1067-1074 |
| **K. M. Smith and C. G. Campbell.** Physical activity during pregnancy: impact of applying different physical activity guidelines. 2013. 2013:165617 |
| **K. M. Smith, R. C. Foster and C. G. Campbell.** PMC3221627; Accuracy of physical activity assessment during pregnancy: an observational study. *BMC Pregnancy & Childbirth.* 2011. 11:86 |
| **K. M. Songoygard, S. N. Stafne, K. A. Evensen, K. A. Salvesen, T. Vik and S. Morkved.** Does exercise during pregnancy prevent postnatal depression? A randomized controlled trial. 2012. 91:62-67 |
| **K. Marsal, G. Gennser and O. Lofgren.** Effects on fetal breathing movements of maternal challenges. Cross-over study on dynamic work, static work, passive movements, hyperventilation and hyperoxygenation. *Acta Obstet.Gynecol.Scand.* 1979. 58:335-342 |
| **K. Marsal, O. Lofgren and G. Gennser.** Fetal breathing movements and maternal exercise. *Acta Obstet.Gynecol.Scand.* 1979. 58:197-201 |
| **K. Mattran, L. M. Mudd, R. A. Rudey and J. S. Kelly.** Leisure-time physical activity during pregnancy and offspring size at 18 to 24 months. *Journal of Physical Activity & Health.* 2011. 8:655-662 |
| **K. Melzer, Y. Schutz, M. Boulvain and B. Kayser.** Pregnancy-related changes in activity energy expenditure and resting metabolic rate in Switzerland. *Eur.J.Clin.Nutr.* 2009. 63:1185-1191 |
| **K. Melzer, Y. Schutz, N. Soehnchen, et al.** Effects of recommended levels of physical activity on pregnancy outcomes. *American Journal of Obstetrics & Gynecology.* 2010. 202:266.e1-266.e6 |
| **K. Morkrid, A. K. Jenum, S. Berntsen, et al.** Objectively recorded physical activity and the association with gestational diabetes. 2014. 24:e389-97 |
| **K. N. Mitchell and B. S. Macneill.** The aerobic capacity of pregnant-women during nonweight-bearing versus weight-bearing exercise. 1988. 68:860-860 |
| **K. Nelson, V. Lohsoonthorn and M. A. Williams.** Preterm delivery risk in relation to maternal occupational and leisure time physical activity among thai women. *Asian Biomedicine.* 2009. 3:267-277 |
| **K. P. Fieril, M. F. Olsén, A. Glantz and M. Larsson.** Experiences of exercise during pregnancy among women who perform regular resistance training: A qualitative study. *Phys.Ther.* 2014. 94:1135-1143 |
| **K. Petrov Fieril, A. Glantz and M. Fagevik Olsen.** The efficacy of moderate-to-vigorous resistance exercise during pregnancy: a randomized controlled trial. *Acta Obstet.Gynecol.Scand.* 2015. 94:35-42 |
| **K. Phan, P. Bidulka, Y. H. Gomez, et al.** Effect of Acute Weight Gain and Physical Activity on Arterial Stiffness in Pregnant Women at High Risk for Hypertensive Disorders of Pregnancy. *Can.J.Cardiol.* 2016. 32:S5 |
| **K. Piravej and R. Saksirinukul.** Survey of patterns, attitudes, and the general effects of exercise during pregnancy in 203 Thai pregnant women at King Chulalongkorn Memorial Hospital. *Journal of the Medical Association of Thailand.* 2001. 84 Suppl 1:S276-82 |
| **K. Polanska, P. Muszynski, W. Sobala, E. Dziewirska, D. Merecz-Kot and W. Hanke.** Maternal lifestyle during pregnancy and child psychomotor development - Polish Mother and Child Cohort study. *Early Hum.Dev.* 2015. 91:317-325 |
| **K. Przybylowicz, M. Przybylowicz, M. Grzybiak and K. Janiszewska.** Effects of physical activity during pregnancy and gestational weight gain on newborn weight and length at birth in Warminsko-Mazurskie province. *Acta Scientiarum Polonorum Technologia Alimentaria.* 2014. 13:203-211 |
| **K. R. Evenson and F. Wen.** National trends in self-reported physical activity and sedentary behaviors among pregnant women: NHANES 1999-2006. *Prev.Med.* 2010. 50:123-128 |
| **K. R. Evenson and F. Wen.** Prevalence and correlates of objectively measured physical activity and sedentary behavior among US pregnant women. *Prev.Med.* 2011. 53:39-43 |
| **K. R. Evenson, A. Siega-Riz, D. A. Savitz, J. A. Leiferman and J. M. Thorp J.** Vigorous leisure activity and pregnancy outcome. *Epidemiology.* 2002. 13:653-659 |
| **K. R. Evenson, D. A. Savitz and S. L. Huston.** Leisure-time physical activity among pregnant women in the US. 2004. 18:400-407 |
| **K. R. Heineman, S. La Bastide-Van Gemert, V. Fidler, K. J. Middelburg, A. F. Bos and M. Hadders-Algra.** Construct validity of the Infant Motor Profile: relation with prenatal, perinatal, and neonatal risk factors. 2010. 52:e209-15 |
| **K. R. Kardel, B. Johansen, N. Voldner, P. O. Iversen and T. Henriksen.** Association between aerobic fitness in late pregnancy and duration of labor in nulliparous women. *Acta Obstet.Gynecol.Scand.* 2009. 88:948-952 |
| **K. R. Kardel.** Effects of intense training during and after pregnancy in top-level athletes. *Scand.J.Med.Sci.Sports.* 2005. 15:79-86 |
| **K. R. Richardsen, I. Mdala, S. Berntsen, et al.** PMC4936091; Objectively recorded physical activity in pregnancy and postpartum in a multi-ethnic cohort: association with access to recreational areas in the neighbourhood. *International Journal of Behavioral Nutrition & Physical Activity.* 2016. 13:78 |
| **K. R. Richardsen, R. S. Falk, A. K. Jenum, et al.** PMC4962490; Predicting who fails to meet the physical activity guideline in pregnancy: a prospective study of objectively recorded physical activity in a population-based multi-ethnic cohort. *BMC Pregnancy & Childbirth.* 2016. 16:186 |
| **K. Rauh, E. Gabriel, E. Kerschbaum, et al.** PMC3718707; Safety and efficacy of a lifestyle intervention for pregnant women to prevent excessive maternal weight gain: a cluster-randomized controlled trial. *BMC Pregnancy & Childbirth.* 2013. 13:151 |
| **K. Rauh, J. Gunther, J. Kunath, L. Stecher and H. Hauner.** PMC4608142; Lifestyle intervention to prevent excessive maternal weight gain: mother and infant follow-up at 12 months postpartum. *BMC Pregnancy & Childbirth.* 2015. 15:265 |
| **K. Renault, K. Norgaard, K. R. Andreasen, N. J. Secher and L. Nilas.** Physical activity during pregnancy in obese and normal-weight women as assessed by pedometer. *Acta Obstet.Gynecol.Scand.* 2010. 89:956-961 |
| **K. Renault, K. Norgaard, N. J. Secher, K. R. Andreasen, B. Baldur-Felskov and L. Nilas.** Physical activity during pregnancy in normal-weight and obese women: compliance using pedometer assessment. 2012. 32:430-433 |
| **K. S. Haugland, S. Rasmussen and A. K. Daltveit.** Group intervention for women with pelvic girdle pain in pregnancy. A randomized controlled trial. 2006. 85:1320-1326 |
| **K. Sjogren Forss, E. Ekvall Hansson, M. Troein and L. Stjernberg.** Patterns of physical activity among women and men before and during pregnancy. 2014. 128:814-816 |
| **K. Smith, L. Lanningham-Foster, A. Welch and C. Campbell.** Web-Based Behavioral Intervention Increases Maternal Exercise but Does Not Prevent Excessive Gestational Weight Gain in Previously Sedentary Women. *Journal of Physical Activity & Health.* 2016. 13:587-593 |
| **K. Soiva, A. Salmi, M. Groenroos and T. Peltonen.** Physical Working Capacity during Pregnancy and Effect of Physical Work Tests on Foetal Heart Rate. *Ann.Chir.Gynaecol.Fenn.* 1964. 53:187-196 |
| **K. T. Kasawara, C. S. Burgos, S. L. do Nascimento, N. O. Ferreira, F. G. Surita and E. S. Pinto.** PMC3753734; Maternal and Perinatal Outcomes of Exercise in Pregnant Women with Chronic Hypertension and/or Previous Preeclampsia: A Randomized Controlled Trial. *ISRN Obstetrics & Gynecology.* 2013. 2013:857047 |
| **K. Ueland, M. J. Novy and J. Metcalfe.** Cardiorespiratory responses to pregnancy and exercise in normal women and patients with heart disease. *American Journal of Obstetrics & Gynecology.* 1973. 115:4-10 |
| **K. Ueland, M. J. Novy and J. Metcalfe.** Cardiorespiratory responses to pregnancy and exercise in normal women and patients with heart disease. 1973. 115:4-10 |
| **K. Ueland, M. J. Novy, E. N. Peterson and J. Metcalfe.** Maternal cardiovascular dynamics. IV. The influence of gestational age on the maternal cardiovascular response to posture and exercise. *American Journal of Obstetrics & Gynecology.* 1969. 104:856-864 |
| **K. Wulff and R. Siegmund.** Emergence of circadian rhythms in infants before and after birth: evidence for variations by parental influence]. *Z.Geburtshilfe Neonatol.* 2002. 206:166-171 |
| **Kimberly R. Andringa, Tyler Bardsley, Amy H. Herring and SeonAe Yeo.** The Impact of Symptom Type and Frequency on Activity Level During Pregnancy. *Journal of Women's Health Physical Therapy.* 2013. 37:4-10 7p |
| **L. A. Dias, P. Driusso, D. L. Aita, S. M. Quintana, K. Bo and C. H. Ferreira.** Effect of pelvic floor muscle training on labour and newborn outcomes: a randomized controlled trial. *Revista Brasileira de Fisioterapia.* 2011. 15:487-493 |
| **L. A. D'Silva, R. E. Davies, S. J. Emery and M. J. Lewis.** Influence of somatic state on cardiovascular measurements in pregnancy. 2014. 35:15-29 |
| **L. A. Haakstad and K. Bo.** Effect of a regular exercise programme on pelvic girdle and low back pain in previously inactive pregnant women: A randomized controlled trial. 2015. 47:229-234 |
| **L. A. Haakstad and K. Bo.** Effect of regular exercise on prevention of excessive weight gain in pregnancy: a randomised controlled trial. 2011. 16:116-125 |
| **L. A. Haakstad and K. Bo.** PMC3198740; Exercise in pregnant women and birth weight: a randomized controlled trial. *BMC Pregnancy & Childbirth.* 2011. 11:66 |
| **L. A. Haakstad, B. Torset and K. Bo.** What is the effect of regular group exercise on maternal psychological outcomes and common pregnancy complaints? An assessor blinded RCT. *Midwifery.* 2016. 32:81-86 |
| **L. A. Haakstad, E. Edvardsen and K. Bo.** Effect of regular exercise on blood pressure in normotensive pregnant women. A randomized controlled trial. *Hypertension in Pregnancy.* 2016. 35:170-180 |
| **L. A. Haakstad, I. Gundersen and K. Bo.** Self-reporting compared to motion monitor in the measurement of physical activity during pregnancy. 2010. 89:749-756 |
| **L. A. Haakstad, N. Voldner and K. Bo.** Stages of change model for participation in physical activity during pregnancy. 2013. 2013:193170 |
| **L. A. Haakstad, N. Voldner, T. Henriksen and K. Bo.** Physical activity level and weight gain in a cohort of pregnant Norwegian women. 2007. 86:559-564 |
| **L. A. Haakstad, N. Voldner, T. Henriksen and K. Bo.** Why do pregnant women stop exercising in the third trimester?. *Acta Obstet.Gynecol.Scand.* 2009. 88:1267-1275 |
| **L. A. Haakstad, N. Voldner, T. Henriksen and K. Bo.** Why do pregnant women stop exercising in the third trimester?. 2009. 88:1267-1275 |
| **L. A. Millard, D. A. Lawlor, A. Fraser and L. D. Howe.** PMC3787488; Physical activity during pregnancy and offspring cardiovascular risk factors: findings from a prospective cohort study.Erratum appears in BMJ Open. 2013;3(12):e003574corr1]. *BMJ Open.* 2013. 3:e003574 |
| **L. A. Pompeii, D. A. Savitz, K. R. Evenson, B. Rogers and M. McMahon.** Physical exertion at work and the risk of preterm delivery and small-for-gestational-age birth. *Obstetrics & Gynecology.* 2005. 106:1279-1288 |
| **L. A. Wolfe, R. J. Preston, G. W. Burggraf and M. J. McGrath.** Effects of pregnancy and chronic exercise on maternal cardiac structure and function. *Can.J.Physiol.Pharmacol.* 1999. 77:909-917 |
| **L. A. Wolfe, R. M. Walker, A. Bonen and M. J. McGrath.** Effects of pregnancy and chronic exercise on respiratory responses to graded exercise. 1994. 76:1928-1936 |
| **L. Atkinson, R. L. Shaw and D. P. French.** Is pregnancy a teachable moment for diet and physical activity behaviour change? An interpretative phenomenological analysis of the experiences of women during their first pregnancy. *British Journal of Health Psychology.* 2016. 11:11 |
| **L. Back, A. Hui, A. Reid, et al.** Comparison of physical activity and nutritional intake in first nations pregnant women in remote communities and urban-living pregnant women. 2012. 36:64-67 |
| **L. Baghirzada, K. N. Downey and A. J. Macarthur.** Assessment of quality of life indicators in the postpartum period. 2013. 22:209-216 |
| **L. Basso, P. T. McCollum, M. R. N. Darling, W. A. Tocchi and W. A. Tanner.** A descriptive study of pregnant women with gallstones. Relation to dietary and social habits, education, physical activity, height, and weight. 1992. 8:629-633 |
| **L. Broberg, A. S. Ersboll, M. G. Backhausen, P. Damm, A. Tabor and H. K. Hegaard.** Compliance with national recommendations for exercise during early pregnancy in a Danish cohort. 2015. 15:317 |
| **L. C. Silveira and C. A. Segre.** Physical exercise during pregnancy and its influence in the type of birth. 2012. 10:409-414 |
| **L. Chasan-Taber, B. H. Marcus, E. Stanek 3, et al.** PMC2851124; A randomized controlled trial of prenatal physical activity to prevent gestational diabetes: design and methods. *Journal of Women's Health.* 2009. 18:851-859 |
| **L. Chasan-Taber, M. D. Schmidt, P. Pekow, B. Sternfeld, J. Manson and G. Markenson.** Correlates of physical activity in pregnancy among Latina women. 2007. 11:353-363 |
| **L. Chasan-Taber, M. D. Schmidt, P. Pekow, et al.** Physical activity and gestational diabetes mellitus among Hispanic women. *Journal of Women's Health.* 2008. 17:999-1008 |
| **L. Chasan-Taber, M. Silveira, B. H. Marcus, B. Braun, E. Stanek and G. Markenson.** Feasibility and efficacy of a physical activity intervention among pregnant women: the behaviors affecting baby and you (B.A.B.Y.) study. *Journal of physical activity & health.* 2011. 8 Suppl 2:228 |
| **L. Chasan-Taber, M. Silveira, K. E. Lynch, et al.** Physical activity before and during pregnancy and risk of abnormal glucose tolerance among Hispanic women. *Diabetes Metab.* 2014. 40:67-75 |
| **L. Chasan-Taber, M. Silveira, K. E. Lynch, P. Pekow, C. G. Solomon and G. Markenson.** Physical activity and gestational weight gain in Hispanic women. 2014. 22:909-918 |
| **L. Chasan-Taber, M. Silveira, P. Pekow, et al.** Physical activity, sedentary behavior and risk of hypertensive disorders of pregnancy in Hispanic women. 2015. 34:1-16 |
| **L. Chasan-Taber, R. T. Fortner, A. Gollenberg, J. Buonnaccorsi, N. Dole and G. Markenson.** A prospective cohort study of modifiable risk factors for gestational diabetes among Hispanic women: design and baseline characteristics. 2010. 19:117-124 |
| **L. Chu, R. Retnakaran, B. Zinman, A. J. G. Hanley and J. K. Hamilton.** Impact of maternal physical activity and infant feeding practices on infant weight gain and adiposity. 2012. 2012: |
| **L. Currie, C. Woolcott, D. F. Fell, B. A. Armson and L. Dodds.** Physical activity and pregnancy outcomes. *Am.J.Epidemiol.* 2011. 173:S214 |
| **L. D. Devoe, M. Arthur and N. Searle.** The effects of maternal ambulation on the nonstress test. *American Journal of Obstetrics & Gynecology.* 1987. 157:240-244 |
| **L. D. Platt, R. Artal, J. Semel, L. Sipos and R. K. Kammula.** Exercise in pregnancy. II. Fetal responses. *American Journal of Obstetrics & Gynecology.* 1983. 147:487-491 |
| **L. de Wit, J. G. Jelsma, M. N. van Poppel, et al.** Physical activity, depressed mood and pregnancy worries in European obese pregnant women: results from the DALI study. 2015. 15:158 |
| **L. de Wit, J. G. Jelsma, M. N. van Poppel, et al.** PMC4521453; Physical activity, depressed mood and pregnancy worries in European obese pregnant women: results from the DALI study. *BMC Pregnancy & Childbirth.* 2015. 15:158 |
| **L. Dibblee and T. E. Graham.** A longitudinal study of changes in aerobic fitness, body composition, and energy intake in primigravid patients. *American Journal of Obstetrics & Gynecology.* 1983. 147:908-914 |
| **L. E. May, A. Glaros, H. W. Yeh, J. F. Clapp 3 and K. M. Gustafson.** Aerobic exercise during pregnancy influences fetal cardiac autonomic control of heart rate and heart rate variability. *Early Hum.Dev.* 2010. 86:213-217 |
| **L. E. May, J. Knowlton, J. Hanson, et al.** Effects of Exercise During Pregnancy on Maternal Heart Rate and Heart Rate Variability. *Pm & R.* 2016. 8:611-617 |
| **L. E. May, R. R. Suminski, A. Berry, M. D. Langaker and K. M. Gustafson.** Maternal physical activity mode and fetal heart outcome. *Early Hum.Dev.* 2014. 90:365-369 |
| **L. E. May, S. A. Scholtz, R. Suminski and K. M. Gustafson.** Aerobic exercise during pregnancy influences infant heart rate variability at one month of age. *Early Hum.Dev.* 2014. 90:33-38 |
| **L. E. McCullough, M. A. Mendez, E. E. Miller, A. P. Murtha, S. K. Murphy and C. Hoyo.** PMC4622928 Available on 04/30/16]; Associations between prenatal physical activity, birth weight, and DNA methylation at genomically imprinted domains in a multiethnic newborn cohort. *Epigenetics: Official Journal of the DNA Methylation Society.* 2015. 10:597-606 |
| **L. Fairley, G. Santorelli, D. A. Lawlor, et al.** PMC4510905; The relationship between early life modifiable risk factors for childhood obesity, ethnicity and body mass index at age 3 years: findings from the Born in Bradford birth cohort study. *BMC Obesity.* 2015. 2:9 |
| **L. Fenster, A. E. Hubbard, G. C. Windham, K. O. Waller and S. H. Swan.** A prospective study of work-related physical exertion and spontaneous abortion. *Epidemiology.* 1997. 8:66-74 |
| **L. Goni, M. Cuervo, S. Santiago, I. Zazpe and J. A. Martinez.** Parity implications for anthropometrical variables, lifestyle behaviors and dietary habits in pregnant women. *Anales del Sistema Sanitario de Navarra.* 2014. 37:349-362 |
| **L. H. Colbert, B. I. Graubard, K. B. Michels, W. C. Willett and M. R. Forman.** Physical activity during pregnancy and age at menarche of the daughter. *Cancer Epidemiology Biomarkers & Prevention.* 2008. 17:2656-2662 |
| **L. Haakstad and K. Bo.** Effect of supervised aerobic dance exercise in prevention of excessive weight gain in pregnancy: A single blind randomized controlled trial. *International Journal of Gynecology and Obstetrics.* 2009. 107:S198 |
| **L. Hayes, C. McParlin, T. I. Kinnunen, et al.** Change in level of physical activity during pregnancy in obese women: findings from the UPBEAT pilot trial. 2015. 15:52 |
| **L. Hayes, C. McParlin, T. I. Kinnunen, et al.** PMC4352291; Change in level of physical activity during pregnancy in obese women: findings from the UPBEAT pilot trial. *BMC Pregnancy & Childbirth.* 2015. 15:52 |
| **L. Hayes, R. Bell, S. C. Robson and L. Poston.** Physical activity in the uk pregnancy better eating and physical activity trial (UPBEAT). *Diabetic Med.* 2016. 33:6-7 |
| **L. J. Lee, E. Symanski, P. J. Lupo, et al.** HHSPA786527 Available on 02/01/17] PMC4888062 Available on 02/01/17]; Data linkage between the National Birth Defects Prevention Study and the Occupational Information Network (O NET) to assess workplace physical activity, sedentary behaviors, and emotional stressors during pregnancy. *Am.J.Ind.Med.* 2016. 59:137-149 |
| **L. J. Mayberry, M. Smith and P. Gill.** Effect of exercise on uterine activity in the patient in preterm labor. 1992. 12:354-358 |
| **L. K. Andersen, M. Backhausen, H. K. Hegaard and M. Juhl.** Physical exercise and pelvic girdle pain in pregnancy: A nested case-control study within the Danish National Birth Cohort. 2015. 6:198-203 |
| **L. K. Badr, B. Abdallah and A. Mahmoud.** Precursors of preterm birth: comparison of three ethnic groups in the middle East and the United States. 2005. 34:444-452 |
| **L. K. Callaway, P. B. Colditz, N. M. Byrne, et al.** PMC2890340; Prevention of gestational diabetes: feasibility issues for an exercise intervention in obese pregnant women. *Diabetes Care.* 2010. 33:1457-1459 |
| **L. K. Micklesfield, N. S. Levitt, M. T. Carstens, M. A. Dhansay, S. A. Norris and E. V. Lambert.** Early life and current determinants of bone in South African children of mixed ancestral origin. 2007. 34:647-655 |
| **L. Kovaleva.** Assessment of risk factors of urinary incontinence in pregnancy, effect of pelvic floor muscle training. *Int.Urogynecol.J.Pelvic Floor Dysfunct.* 2011. 22:S1473 |
| **L. Larsson and P. G. Lindqvist.** Low-impact exercise during pregnancy--a study of safety. *Acta Obstet.Gynecol.Scand.* 2005. 84:34-38 |
| **L. M. Currie, C. G. Woolcott, D. B. Fell, B. A. Armson and L. Dodds.** The association between physical activity and maternal and neonatal outcomes: a prospective cohort. *Maternal & Child Health Journal.* 2014. 18:1823-1830 |
| **L. M. E. McCowan, C. T. Roberts, G. A. Dekker, et al.** Risk factors for small-for-gestational-age infants by customised birthweight centiles: Data from an international prospective cohort study. 2010. 117:1599-1607 |
| **L. M. Mudd, J. Pivarnik, C. B. Holzman, N. Paneth, K. Pfeiffer and H. Chung.** NIHMS574330 PMC4051283; Leisure-time physical activity in pregnancy and the birth weight distribution: where is the effect?. *Journal of Physical Activity & Health.* 2012. 9:1168-1177 |
| **L. M. Sorbye, K. Klungsoyr, O. Samdal, K. M. Owe and N. H. Morken.** NIHMS649381 Available on 09/01/16] PMC4523494 Available on 09/01/16]; Pre-pregnant body mass index and recreational physical activity: effects on perinatal mortality in a prospective pregnancy cohort. *BJOG: An International Journal of Obstetrics & Gynaecology.* 2015. 122:1322-1330 |
| **L. M. Szymanski and A. J. Satin.** NIHMS351567 PMC3297473; Exercise during pregnancy: fetal responses to current public health guidelines. *Obstetrics & Gynecology.* 2012. 119:603-610 |
| **L. M. Szymanski and A. J. Satin.** NIHMS395779 PMC3464969; Strenuous exercise during pregnancy: is there a limit?. *American Journal of Obstetrics & Gynecology.* 2012. 207:179.e1-179.e6 |
| **L. Mason, B. Roe, H. Wong, J. Davies and J. Bamber.** The role of antenatal pelvic floor muscle exercises in prevention of postpartum stress incontinence: a randomised controlled trial. 2010. 19:2777-2786 |
| **L. Mason, S. Glenn, I. Walton and C. Hughes.** Do women practise pelvic floor exercises during pregnancy or following delivery?. 2001. 87:662-670 |
| **L. Mason, S. Glenn, I. Walton and C. Hughes.** The relationship between between ante-natal pelvic floor muscle exercises and post-partum stress incontinence. 2001. 87:651-670 14 |
| **L. Mason.** Stress incontinence in childbearing women. 2001. 7:72-75 4 |
| **L. Nilsson-Wikmar, K. Holm, R. Oijerstedt and K. Harms-Ringdahl.** Effect of three different physical therapy treatments on pain and activity in pregnant women with pelvic girdle pain: A randomized clinical trial with 3, 6, and 12 months follow-up postpartum. *Spine.* 2005. 30:850-856 |
| **L. Orawan and W. Preecha.** Effect of pelvic floor muscle training (PFMT) during pregnancy on bladder neck descend and delivery. *Journal of the Medical Association of Thailand.* 2014. 97:S156-S163 |
| **L. Pijpers, J. W. Wladimiroff and J. McGhie.** Effect of short-term maternal exercise on maternal and fetal cardiovascular dynamics. *British Journal of Obstetrics & Gynaecology.* 1984. 91:1081-1086 |
| **L. Poston, A. L. Briley, S. Barr, et al.** PMC3718630; Developing a complex intervention for diet and activity behaviour change in obese pregnant women (the UPBEAT trial); assessment of behavioural change and process evaluation in a pilot randomised controlled trial. *BMC Pregnancy & Childbirth.* 2013. 13:148 |
| **L. R. D. Varella, V. B. Torres, P. H. M. Angelo, et al.** Influence of parity, type of delivery, and physical activity level on pelvic floor muscles in postmenopausal women. *Journal of Physical Therapy Science.* 2016. 28:824-830 |
| **L. R. Sagedal, B. Sanda, N. C. Overby, et al.** The effect of prenatal lifestyle intervention on weight retention 12 months postpartum: results of the Norwegian Fit for Delivery randomised controlled trial. *BJOG: An International Journal of Obstetrics & Gynaecology.* 2016. 20:20 |
| **L. R. Sagedal, N. C. Overby, E. Bere, et al.** Lifestyle intervention to limit gestational weight gain: the Norwegian Fit for Delivery randomised controlled trial. *BJOG: An International Journal of Obstetrics & Gynaecology.* 2016. 14:14 |
| **L. R. Sagedal, N. C. Overby, H. Lohne-Seiler, et al.** PMC3577450; Study protocol: fit for delivery - can a lifestyle intervention in pregnancy result in measurable health benefits for mothers and newborns? A randomized controlled trial. *BMC Public Health.* 2013. 13:132 |
| **L. R. Varella, V. B. Torres, P. H. Angelo, et al.** PMC4842447; Influence of parity, type of delivery, and physical activity level on pelvic floor muscles in postmenopausal women. *Journal of Physical Therapy Science.* 2016. 28:824-830 |
| **L. Rodr**. Treatment compliance in pregnant women with gestational diabetes after an education program: relationship with anxiety and sociodemographic variables. 2004. 14:318-327 10 |
| **L. S. Adair, C. W. Kuzawa and J. Borja.** Maternal energy stores and diet composition during pregnancy program adolescent blood pressure. *Circulation.* 2001. 104:1034-1039 |
| **L. Schack-Nielsen, C. Molgaard, D. Larsen, C. Martyn and K. F. Michaelsen.** Arterial stiffness in 10-year-old children: Current and early determinants. 2005. 94:1004-1011 |
| **L. Sibley, R. O. Ruhling, J. Cameron-Foster, C. Christensen and T. Bolen.** Swimming and physical fitness during pregnancy. *J.Nurse.* 1981. 26:3-12 |
| **L. Spatling, F. Fallenstein, A. Huch, R. Huch and G. Rooth.** The variability of cardiopulmonary adaptation to pregnancy at rest and during exercise. 1992. 99 Suppl 8:1-40 |
| **L. Z. Jaime, B. M. Manuela, O. C. Catalina, J. M. I. Mar**. Physical activity level according to GPAQ in pregnant and postpartum women attended in a family health center. *Rev.Chil.Obstet.Ginecol.* 2013. 78:425-431 |
| **L. Zhu, L. Li, J. H. Lang and T. Xu.** Prevalence and risk factors for peri- and postpartum urinary incontinence in primiparous women in China: a prospective longitudinal study. 2012. 23:563-572 |
| **Lanay M. Mudd, Jim M. Pivarnik, Karin A. Pfeiffer, Nigel Paneth, Hwan Chung and Claudia Holzman.** Maternal physical activity during pregnancy, child leisure-time activity, and child weight status at 3 to 9 years. *Journal of Physical Activity & Health.* 2015. 12:506-514 |
| **Lene A. H. Haakstad and Kari Bo.** Effect of a regular exercise programme on pelvic girdle and low back pain in previously inactive pregnant women: a randomized controlled trial. *Journal of Rehabilitation Medicine (Stiftelsen Rehabiliteringsinformation).* 2015. 47:229-234 6p |
| **Lisa A. Uebelacker, Cynthia L. Battle, Kaeli A. Sutton, Susanna R. Magee and Ivan W. Miller.** A pilot randomized controlled trial comparing prenatal yoga to perinatal health education for antenatal depression. 2015. No Pagination Specified |
| **Lou Atkinson, Ellinor K. Olander and David P. French.** Acceptability of a weight management intervention for pregnant and postpartum women with BMI >30 kg/m2: A qualitative evaluation of an individualized, home-based service. *Matern.Child Health J.* 2016. 20:88-96 |
| **Lucy C. Chappell, Paul T. Seed, Jenny Myers, et al.** Exploration and confirmation of factors associated with uncomplicated pregnancy in nulliparous women: prospective cohort study. 2015. 49:136-136 |
| **M. A. Carvalhaes, A. C. Martiniano, M. B. Malta, M. Y. Takito and M. H. Benicio.** [Physical activity in pregnant women receiving care in primary health care units]. 2013. 47:958-967 |
| **M. A. Klebanoff, P. H. Shiono and J. C. Carey.** The effect of physical activity during pregnancy on preterm delivery and birth weight. *American Journal of Obstetrics & Gynecology.* 1990. 163:1450-1456 |
| **M. A. Kominiarek.** A survey of health behaviors in minority women in pregnancy: the influence of body mass index. 2014. 24:e291-5 |
| **M. A. Manders, G. J. Sonder, E. J. Mulder and G. H. Visser.** The effects of maternal exercise on fetal heart rate and movement patterns. *Early Hum.Dev.* 1997. 48:237-247 |
| **M. A. Miquelutti, J. G. Cecatti and M. Y. Makuch.** PMC3750492; Evaluation of a birth preparation program on lumbopelvic pain, urinary incontinence, anxiety and exercise: a randomized controlled trial. *BMC Pregnancy & Childbirth.* 2013. 13:154 |
| **M. A. Q. Mutsaerts, H. Groen, Der Meer Buiter-Van, et al.** Effects of paternal and maternal lifestyle factors on pregnancy complications and perinatal outcome. A Dutch population-based birth-cohort study: The GECKO Drenthe study. *Human Reproduction.* 2012. 27: |
| **M. A. Sady, B. B. Haydon, S. P. Sady, M. W. Carpenter, P. D. Thompson and D. R. Coustan.** Cardiovascular-response to maximal cycle exercise during pregnancy and at 2 and 7 months post partum. *Obstet.Gynecol.* 1990. 162:1181-1185 |
| **M. A. Szmeja, C. Cramp, R. M. Grivell, A. R. Deussen, L. N. Yelland and J. M. Dodd.** Use of a DVD to provide dietary and lifestyle information to pregnant women who are overweight or obese: a nested randomised trial. *BMC pregnancy and childbirth.* 2014. 14:12 |
| **M. Aittasalo, J. Raitanen, T. I. Kinnunen, K. Ojala, P. Kolu and R. Luoto.** Is intensive counseling in maternity care feasible and effective in promoting physical activity among women at risk for gestational diabetes? Secondary analysis of a cluster randomized NELLI study in Finland. *International Journal of Behavioral Nutrition and Physical Activity.* 2012. 9 (no pagination): |
| **M. Aittasalo, M. Pasanen, M. Fogelholm, T. I. Kinnunen, K. Ojala and R. Luoto.** Physical activity counseling in maternity and child health care - a controlled trial. 2008. 8:14 |
| **M. B. Sexton, H. A. Flynn, C. Lancaster, et al.** Predictors of recovery from prenatal depressive symptoms from pregnancy through postpartum. 2012. 21:43-49 |
| **M. B. van Doorn, F. K. Lotgering, P. C. Struijk, J. Pool and H. C. Wallenburg.** Maternal and fetal cardiovascular responses to strenuous bicycle exercise. *American Journal of Obstetrics & Gynecology.* 1992. 166:854-859 |
| **M. Bisson, C. Rheaume, E. Bujold, A. Tremblay and I. Marc.** Modulation of blood pressure response to exercise by physical activity and relationship with resting blood pressure during pregnancy. 2014. 32:1450-7; discussion 1457 |
| **M. Bisson, N. Almeras, J. Plaisance, et al.** Maternal fitness at the onset of the second trimester of pregnancy: correlates and relationship with infant birth weight. *Pediatric Obesity.* 2013. 8:464-474 |
| **M. Bisson, N. Almeras, S. S. Dufresne, et al.** A 12-Week Exercise Program for Pregnant Women with Obesity to Improve Physical Activity Levels: An Open Randomised Preliminary Study. *Plos One.* 2015. 10: |
| **M. Bonzini, D. Coggon, K. Godfrey, H. Inskip, S. Crozier and K. T. Palmer.** PMC3088899 UKMS35217; Occupational physical activities, working hours and outcome of pregnancy: findings from the Southampton Women's Survey. *Occupational & Environmental Medicine.* 2009. 66:685-690 |
| **M. C. Hatch, X. O. Shu, D. E. McLean, et al.** Maternal exercise during pregnancy, physical fitness, and fetal growth. *Am.J.Epidemiol.* 1993. 137:1105-1114 |
| **M. Connelly, H. Brown, P. van der Pligt and M. Teychenne.** Modifiable barriers to leisure-time physical activity during pregnancy: a qualitative study investigating first time mother's views and experiences. 2015. 15:100 |
| **M. D. Hennessy, S. L. Volpe, M. D. Sammel and S. Gennaro.** Skipping meals and less walking among African Americans diagnosed with preterm labor. *Journal of Nursing Scholarship.* 2010. 42:147-155 |
| **M. D. Schmidt, P. Pekow, P. S. Freedson, G. Markenson and L. Chasan-Taber.** Physical activity patterns during pregnancy in a diverse population of women. *Journal of Women's Health.* 2006. 15:909-918 |
| **M. Dekker Nitert, H. L. Barrett, K. J. Denny, H. D. McIntyre and L. K. Callaway.** Exercise in pregnancy does not alter gestational weight gain, MCP-1 or leptin in obese women. *Australian and New Zealand Journal of Obstetrics and Gynaecology.* 2015. 55:27-33 |
| **M. Dello Russo, W. Ahrens, T. De Vriendt, et al.** Gestational weight gain and adiposity, fat distribution, metabolic profile, and blood pressure in offspring: the IDEFICS project. *Int.J.Obes.* 2013. 37:914-919 |
| **M. Dimov, J. Khoury and R. Tsang.** Bone mineral loss during pregnancy: is tennis protective?. *Journal of Physical Activity & Health.* 2010. 7:239-245 |
| **M. Doustan, M. Seifourian, M. Zarghami and T. Azmsha.** Relationship between physical activity of mothers before and during pregnancy with the newborn health and pregnancy outcome. *Journal of Physical Education and Sport.* 2012. 12:222-229 |
| **M. E. Bolton.** Scuba diving and fetal well-being: a survey of 208 women. 1980. 7:183-189 |
| **M. E. O'Neill, K. A. Cooper, C. M. Cook, B. J. Trudinger, E. S. Boyce and S. N. Hunyor.** The influence of exercise intensity on the umbilical artery flow velocity waveform and foetal heart rate response to moderate duration, semi-supine cycling in late pregnancy. *Aust.J.Sci.Med.Sport.* 1991. 23:101-104 |
| **M. E. O'Neill, K. A. Cooper, C. M. Mills, E. S. Boyce and S. N. Hunyor.** Accuracy of Borg's ratings of perceived exertion in the prediction of heart rates during pregnancy. 1992. 26:121-124 |
| **M. E. O'Neill, K. A. Cooper, E. S. Boyce and S. N. Hunyor.** Postural effects when cycling in late pregnancy. *Women & Birth: Journal of the Australian College of Midwives.* 2006. 19:107-111 |
| **M. E. O'Neill, K. A. Cooper, S. N. Hunyor and S. Boyce.** Cardiorespiratory response to walking in trained and sedentary pregnant women. *J.Sports Med.Phys.Fitness.* 1993. 33:40-43 |
| **M. E. O'Neill.** PMC1332262; Maternal rectal temperature and fetal heart rate responses to upright cycling in late pregnancy. *Br.J.Sports Med.* 1996. 30:32-35 |
| **M. F. Hjorth, S. Kloster, T. Girma, et al.** Level and intensity of objectively assessed physical activity among pregnant women from urban Ethiopia. 2012. 12:154 |
| **M. F. Hjorth, S. Kloster, T. Girma, et al.** PMC3543321; Level and intensity of objectively assessed physical activity among pregnant women from urban Ethiopia. *BMC Pregnancy & Childbirth.* 2012. 12:154 |
| **M. F. Mottola, I. Giroux, R. Gratton, et al.** Nutrition and exercise prevent excess weight gain in overweight pregnant women. 2010. 42:265-272 |
| **M. F. Mottola, M. H. Davenport, C. R. Brun, S. D. Inglis, S. Charlesworth and M. M. Sopper.** VO2peak prediction and exercise prescription for pregnant women. 2006. 38:1389-1395 |
| **M. F. Sowers, T. Scholl, L. Harris and M. Jannausch.** Bone loss in adolescent and adult pregnant women. 2000. 96:189-193 |
| **M. G. Backhausen, M. Katballe, H. Hansson, A. Tabor, P. Damm and H. K. Hegaard.** A standardised individual unsupervised water exercise intervention for healthy pregnant women. A qualitative feasibility study. 2014. 5:176-181 |
| **M. Gharaibeh, R. Al-Ma'aitah and N. Al Jada.** Lifestyle practices of Jordanian pregnant women. 2005. 52:92-100 |
| **M. Gojnic, M. Perovic, M. Pervulov and A. Ljubic.** The effects of adjuvant insulin therapy among pregnant women with IGT who failed to achieve the desired glycemia levels by diet and moderate physical activity. *Journal of Maternal-Fetal and Neonatal Medicine.* 2012. 25:2028-2034 |
| **M. Goodarzi Khoigani, Z. Paknahad and F. Mardanian.** The relationship between nutrients intake and preeclampsia in pregnant women. 2012. 17:S210-S217 |
| **M. Gustafsson, S. Stafne, P. Romundstad, S. Mørkved, K. Salvesen and A. S. Helvik.** The effects of an exercise programme during pregnancy on health-related quality of life in pregnant women: A Norwegian randomised controlled trial. *BJOG: An International Journal of Obstetrics and Gynaecology.* 2015. |
| **M. Guszkowska, K. Sempolska, A. Zaremba and M. Langwald.** Exercise or relaxation? Which is more effective in improving the emotional state of pregnant women?. 2013. 14:168-174 |
| **M. Guszkowska, M. Langwald and K. Sempolska.** Does Physical Exercise Help Maintain Mental Health During Pregnancy? A Comparison of Changes in Mental Health in Participants of Physical Exercise Classes and Childbirth Classes. *Journal of Physical Activity & Health.* 2015. 12:30-36 |
| **M. Guszkowska, M. Langwald and K. Sempolska.** Influence of a relaxation session and an exercise class on emotional states in pregnant women. *Journal of Reproductive and Infant Psychology.* 2013. 31:121-133 |
| **M. Guszkowska, M. Langwald and K. Sempolska.** Influence of a relaxation session and an exercise class on emotional states in pregnant women. 2013. 31:121-133 |
| **M. Guszkowska, M. Langwald, D. Dudziak and A. Zaremba.** Influence of a single physical exercise class on mood states of pregnant women. *Journal of Psychosomatic Obstetrics and Gynecology.* 2013. 34:98-104 |
| **M. Guszkowska, M. Langwald, D. Dudziak and A. Zaremba.** Influence of a single physical exercise class on mood states of pregnant women. 2013. 34:98-104 |
| **M. Guszkowska.** The effect of exercise and childbirth classes on fear of childbirth and locus of labor pain control. 2014. 27:176-189 |
| **M. H. Black, D. A. Sacks, A. H. Xiang and J. M. Lawrence.** PMC3526206; The relative contribution of prepregnancy overweight and obesity, gestational weight gain, and IADPSG-defined gestational diabetes mellitus to fetal overgrowth. *Diabetes Care.* 2013. 36:56-62 |
| **M. H. Davenport, C. D. Steinback and M. F. Mottola.** Impact of pregnancy and obesity on cardiorespiratory responses during weight-bearing exercise. 2009. 167:341-347 |
| **M. H. Davenport, S. Charlesworth, D. Vanderspank, M. M. Sopper and M. F. Mottola.** Development and validation of exercise target heart rate zones for overweight and obese pregnant women. 2008. 33:984-989 |
| **M. H. Eggen, B. Stuge, P. Mowinckel, K. S. Jensen and K. B. Hagen.** Can supervised group exercises including ergonomic advice reduce the prevalence and severity of low back pain and pelvic girdle pain in pregnancy? A randomized controlled trial. 2012. 92:781-790 |
| **M. Hatch, B. Levin, X. O. Shu and M. Susser.** PMC1508461; Maternal leisure-time exercise and timely delivery. *Am.J.Public Health.* 1998. 88:1528-1533 |
| **M. Hatch, B. T. Ji, X. O. Shu and M. Susser.** Do standing, lifting, climbing, or long hours of work during pregnancy have an effect on fetal growth?. *Epidemiology.* 1997. 8:530-536 |
| **M. Hawkins, L. Chasan-Taber, B. Marcus, et al.** Impact of an exercise intervention on physical activity during pregnancy: the behaviors affecting baby and you study. 2014. 104:e74-81 |
| **M. Hawkins, L. Chasan-Taber, B. Marcus, et al.** PMC4167076 Available on 10/01/15]; Impact of an exercise intervention on physical activity during pregnancy: the behaviors affecting baby and you study. *Am.J.Public Health.* 2014. 104:e74-81 |
| **M. Hawkins, P. Pekow and L. Chasan-Taber.** Physical activity, sedentary behavior, and C-reactive protein in pregnancy. 2014. 46:284-292 |
| **M. Hayman, C. Short and P. Reaburn.** An investigation into the exercise behaviours of regionally based Australian pregnant women. 2015. |
| **M. I. Both, M. A. Overvest, M. F. Wildhagen, J. Golding and H. I. Wildschut.** PMC2896625; The association of daily physical activity and birth outcome: a population-based cohort study. *Eur.J.Epidemiol.* 2010. 25:421-429 |
| **M. I. Both, M. A. Overvest, M. F. Wildhagen, J. Golding and H. I. Wildschut.** The association of daily physical activity and birth outcome: a population-based cohort study. 2010. 25:421-429 |
| **M. J. Berry, R. G. McMurray and V. L. Katz.** Pulmonary and ventilatory responses to pregnancy, immersion, and exercise. 1989. 66:857-862 |
| **M. J. Edwards, J. Metcalfe, M. J. Dunham and M. S. Paul.** Accelerated respiratory response to moderate exercise in late pregnancy. *Respir.Physiol.* 1981. 45:229-241 |
| **M. J. Mantle, R. M. Greenwood and H. L. F. Currey.** Backache in pregnancy. 1977. 16:95-101 |
| **M. J. Morton, M. S. Paul, G. R. Campos, M. V. Hart and J. Metcalfe.** Exercise dynamics in late gestation: effects of physical training. *American Journal of Obstetrics & Gynecology.* 1985. 152:91-97 |
| **M. J. Nieuwenhuijsen, K. Northstone, J. Golding and Alspac Study Team.** Swimming and birth weight. *Epidemiology.* 2002. 13:725-728 |
| **M. J. Ong, K. E. Wallman, P. A. Fournier, J. P. Newnham and K. J. Guelfi.** PMC4946108; Enhancing energy expenditure and enjoyment of exercise during pregnancy through the addition of brief higher intensity intervals to traditional continuous moderate intensity cycling. *BMC Pregnancy & Childbirth.* 2016. 16:161 |
| **M. J. Saurel-Cubizolles, D. Subtil and M. Kaminski.** Is preterm delivery still related to physical working conditions in pregnancy?. 1991. 45:29-34 |
| **M. J. Saurel-Cubizolles, M. Kaminski, C. Du Mazaubrun and G. Breart.** Working conditions and arterial hypertension during pregnancy. [French]. 1991. 39:37-43 |
| **M. J. Saurel-Cubizolles, M. Kaminski, C. Du Mazaubrun, J. Llado and M. Estryn-Behar.** High blood pressure during pregnancy and working conditions among hospital personnel. 1991. 40:29-34 |
| **M. J. Shim, Y. S. Lee, H. E. Oh and J. S. Kim.** Effects of a back-pain-reducing program during pregnancy for Korean women: a non-equivalent control-group pretest-posttest study. 2007. 44:19-28 |
| **M. Jedrzejko, K. Nowosielski, R. Poreba, I. Ulman-Wlodarz and R. Bobinski.** Physical efficiency and activity energy expenditure in term pregnancy females measured during cardiopulmonary exercise tests with a supine cycle ergometer. *Journal of Maternal-Fetal & Neonatal Medicine.* 2016. 1-22 |
| **M. Jozwik and M. Jozwik.** The physiological basis of pelvic floor exercises in the treatment of stress urinary incontinence. *Br.J.Obstet.Gynaecol.* 1998. 105:1046-1051 |
| **M. Juhl, J. Olsen, P. K. Andersen, E. A. Nohr and A. M. Andersen.** Physical exercise during pregnancy and fetal growth measures: a study within the Danish National Birth Cohort. *American Journal of Obstetrics & Gynecology.* 2010. 202:63.e1-63.e8 |
| **M. Juhl, K. Strandberg-Larsen, P. S. Larsen, et al.** Occupational lifting during pregnancy and risk of fetal death in a large national cohort study. *Scandinavian Journal of Work, Environment and Health.* 2013. 39:335-342 |
| **M. Juhl, M. Kogevinas, P. K. Andersen, A. M. Andersen and J. Olsen.** Is swimming during pregnancy a safe exercise?. *Epidemiology.* 2010. 21:253-258 |
| **M. Juhl, M. Madsen, A. M. N. Andersen, P. K. Andersen and J. Olsen.** Distribution and predictors of exercise habits among pregnant women in the Danish National Birth Cohort. 2012. 22:128-138 |
| **M. Juhl, P. K. Andersen, J. Olsen and A. M. Andersen.** Psychosocial and physical work environment, and risk of pelvic pain in pregnancy. A study within the Danish national birth cohort. 2005. 59:580-585 |
| **M. Juhl, P. K. Andersen, J. Olsen, et al.** Physical exercise during pregnancy and the risk of preterm birth: a study within the Danish National Birth Cohort. *Am.J.Epidemiol.* 2008. 167:859-866 |
| **M. Juhl, P. S. Larsen, P. K. Andersen, et al.** Occupational lifting during pregnancy and child's birth size in a large cohort study. *Scandinavian Journal of Work, Environment and Health.* 2014. 40:411-419 |
| **M. K. Campbell and M. F. Mottola.** Recreational exercise and occupational activity during pregnancy and birth weight: a case-control study. *American Journal of Obstetrics & Gynecology.* 2001. 184:403-408 |
| **M. K. Horan, C. A. McGowan, E. R. Gibney, J. Byrne, J. M. Donnelly and F. M. McAuliffe.** Maternal nutrition and glycaemic index during pregnancy impacts on offspring adiposity at 6 months of age-analysis from the ROLO randomised controlled trial. *Nutrients.* 2016. 8: |
| **M. K. Horan, C. A. McGowan, E. R. Gibney, J. M. Donnelly and F. M. McAuliffe.** Maternal diet and weight at 3 months postpartum following a pregnancy intervention with a low glycaemic index diet: results from the ROLO randomised control trial. 2014. 6:2946-2955 |
| **M. K. Horan, C. A. McGowan, J. Donnelly, E. Gibney and F. M. McAuliffe.** Maternal diet and weight at 3 months partum following a pregnancy intervention with a low glycaemic index diet: Results from the ROLO randomised control trial. *Archives of Disease in Childhood: Fetal and Neonatal Edition.* 2014. 99: |
| **M. K. Horan, C. A. McGowan, O. Doyle and F. M. McAuliffe.** Well-being in pregnancy: an examination of the effect of socioeconomic, dietary and lifestyle factors including impact of a low glycaemic index dietary intervention. *Eur.J.Clin.Nutr.* 2014. 68:19-24 |
| **M. Kamali, E. Jafari and S. Mazloom Zadeh.** The effect of 'sitting pelvic tilt exercise' on low back pain and sleep disorder in primigravidas during the third trimester. *Qom University of Medical Sciences Journal.* 2009. 3:7-7 1p |
| **M. Kashanian, Z. Akbari and M. H. Alizadeh.** The effect of exercise on back pain and lordosis in pregnant women. *International Journal of Gynecology and Obstetrics.* 2009. 107:160-161 |
| **M. Kashanian, Z. Akbari and M. H. Alizadeh.** The effect of exercise on back pain and lordosis in pregnant women. 2009. 107:160-161 |
| **M. Kihlstrand, B. Stenman, S. Nilsson and O. Axelsson.** Water-gymnastics reduced the intensity of back/low back pain in pregnant women. 1999. 78:180-185 |
| **M. Koushkie Jahromi, B. Namavar Jahromi and S. Hojjati.** PMC3407581; Relationship between Daily Physical Activity During Last Month of Pregnancy and Pregnancy Outcome. *Iranian Red Crescent Medical Journal.* 2011. 13:15-20 |
| **M. Kucuk and F. Doymaz.** Placental weight and placental weight-to-birth weight ratio are increased in diet- and exercise-treated gestational diabetes mellitus subjects but not in subjects with one abnormal value on 100-g oral glucose tolerance test. *Journal of Diabetes & its Complications.* 2009. 23:25-31 |
| **M. Kusaka, M. Matsuzaki, M. Shiraishi and M. Haruna.** Immediate stress reduction effects of yoga during pregnancy: One group pre-post test. *Women & Birth: Journal of the Australian College of Midwives.* 2016. 16:16 |
| **M. L. Bovbjerg and A. Siega-Riz.** NIHMS384329 PMC3478876; Exercise during pregnancy and cesarean delivery: North Carolina PRAMS, 2004-2005. *Birth.* 2009. 36:200-207 |
| **M. L. Bovbjerg, A. M. Siega-Riz, K. R. Evenson and W. Goodnight.** Exposure analysis methods impact associations between maternal physical activity and cesarean delivery. 2015. 12:37-47 |
| **M. L. Gau, C. Y. Chang, S. H. Tian and K. C. Lin.** Effects of birth ball exercise on pain and self-efficacy during childbirth: a randomised controlled trial in Taiwan. 2011. 27:e293-300 |
| **M. L. Middlekauff, M. J. Egger, I. Nygaard and J. M. Shaw.** The impact of acute and chronic strenuous exercise on pelvic floor muscle strength and support in nulliparous healthy women. *Female Pelvic Medicine and Reconstructive Surgery.* 2015. 1):S15 |
| **M. L. Osterdal, M. Strom, A. K. Klemmensen, et al.** Does leisure time physical activity in early pregnancy protect against pre-eclampsia? Prospective cohort in Danish women. 2009. 116:98-107 |
| **M. L. Pernoll, J. Metcalfe, P. A. Kovach, R. Wachtel and M. J. Dunham.** Ventilation during rest and exercise in pregnancy and postpartum. 1975. 25:295-310 |
| **M. L. Pernoll, J. Metcalfe, T. L. Schlenker, J. E. Welch and J. A. Matsumoto.** Oxygen consumption at rest and during exercise in pregnancy. 1975. 25:285-293 |
| **M. L. Ree, I. Nygaard and K. Bø.** Muscular fatigue in the pelvic floor muscles after strenuous physical activity. *Acta Obstet.Gynecol.Scand.* 2007. 86:870-876 |
| **M. L. Ruebel, K. Shankar, T. Badger and A. Andres.** Differences in resting metabolic rate and physical activity patterns in lean and overweight/obese pregnant women. *FASEB Journal.* 2012. 26: |
| **M. Latka, J. Kline and M. Hatch.** Exercise and spontaneous abortion of known karyotype. *Epidemiology.* 1999. 10:73-75 |
| **M. Lawrence and R. G. Whitehead.** Physical activity and total energy expenditure of child-bearing Gambian village women. *Eur.J.Clin.Nutr.* 1988. 42:145-160 |
| **M. Leppanen, M. Aittasalo, J. Raitanen, T. I. Kinnunen, U. M. Kujala and R. Luoto.** Physical activity during pregnancy: predictors of change, perceived support and barriers among women at increased risk of gestational diabetes. 2014. 18:2158-2166 |
| **M. Lima, S. Ismail, A. Ashworth and S. S. Morris.** Influence of heavy agricultural work during pregnancy on birthweight in Northeast Brazil. *Int.J.Epidemiol.* 1999. 28:469-474 |
| **M. Lindqvist, M. Lindkvist, E. Eurenius, M. Persson, A. Ivarsson and I. Mogren.** Leisure time physical activity among pregnant women and its associations with maternal characteristics and pregnancy outcomes. *Sexual and Reproductive Healthcare.* 2016. 9:14-20 |
| **M. Lof and E. Forsum.** Activity pattern and energy expenditure due to physical activity before and during pregnancey in healthy Swedish women. *Br.J.Nutr.* 2006. 95:296-302 |
| **M. Lof, L. Hilakivi-Clarke, S. Sandin and E. Weiderpass.** Effects of pre-pregnancy physical activity and maternal BMI on gestational weight gain and birth weight. *Acta Obstet.Gynecol.Scand.* 2008. 87:524-530 |
| **M. Lof.** Physical activity pattern and activity energy expenditure in healthy pregnant and non-pregnant Swedish women. 2011. 65:1295-1301 |
| **M. Luaces Mendez, R. Barakat, R. Montejo-Rodriguez and M. Perales-Santaella.** Effects of physical exercise on cardiovascular status and ventricular mechanics during pregnancy: A casecontrol study. *Eur.Heart J.* 2011. 32:1026 |
| **M. M. Demment, M. L. Graham and C. M. Olson.** How an online intervention to prevent excessive gestational weight gain is used and by whom: a randomized controlled process evaluation. 2014. 16:e194 |
| **M. M. Kennelly, M. Geary, N. McCaffrey, P. McLoughlin, A. Staines and P. McKenna.** Exercise-related changes in umbilical and uterine artery waveforms as assessed by Doppler ultrasound scans. *American Journal of Obstetrics & Gynecology.* 2002. 187:661-666 |
| **M. M. Kennelly, N. McCaffrey, P. McLoughlin, S. Lyons and P. McKenna.** Fetal heart rate response to strenuous maternal exercise: not a predictor of fetal distress. *American Journal of Obstetrics & Gynecology.* 2002. 187:811-816 |
| **M. M. Lawani, E. Alihonou, B. Akplogan, G. Poumarat, L. Okou and N. Adjadi.** Effect of antenatal gymnastics on childbirth: a study on 50 sedentary women in the Republic of Benin during the second and third quarters of pregnancy]. *Sante.* 2003. 13:235-241 |
| **M. M. Okido, F. L. Valeri, W. P. Martins, C. H. Ferreira, G. Duarte and R. C. Cavalli.** Assessment of foetal wellbeing in pregnant women subjected to pelvic floor muscle training: a controlled randomised study. *International Urogynecology Journal.* 2015. 26:1475-1481 |
| **M. M. Shangold.** Exercise-induced changes in uterine artery blood flow, as measured by Doppler ultrasound, in pregnant subjects. 1988. 5:187-188 |
| **M. M. van Poppel, L. De Wit, J. Jelsma, A. Bogaerts and F. J. Snock.** Physical activity and mental health in obese pregnant women: results from dali study. *Int.J.Behav.Med.* 2014. 21:S146 |
| **M. Madsen, T. Jorgensen, M. L. Jensen, et al.** Leisure time physical exercise during pregnancy and the risk of miscarriage: A study within the Danish National Birth Cohort. *BJOG: An International Journal of Obstetrics and Gynaecology.* 2007. 114:1419-1426 |
| **M. Makara-Studzinskct, K. Kry-Noszczyk, M. Starczynska, A. Sieron and Z. Sliwinski.** Types of physical activity during pregnancy. 2013. 20:19-24 |
| **M. Moffatt and M. Flynn.** Prevention of pregnancy-related lumbopelvic pain, using a single exercise and advice-based physiotherapy intervention in early pregnancy: A pilot study. 2014. 35:41-48 |
| **M. Muzik, S. E. Hamilton, K. Lisa Rosenblum, E. Waxler and Z. Hadi.** Mindfulness yoga during pregnancy for psychiatrically at-risk women: preliminary results from a pilot feasibility study. *Complementary Therapies in Clinical Practice.* 2012. 18:235-240 |
| **M. N. van Poppel, M. Peinhaupt, M. E. Eekhoff, et al.** Physical activity in overweight and obese pregnant women is associated with higher levels of proinflammatory cytokines and with reduced insulin response through interleukin-6. *Diabetes Care.* 2014. 37:1132-1139 |
| **M. N. van Poppel, N. Oostdam, M. E. Eekhoff, M. G. Wouters, W. van Mechelen and P. M. Catalano.** Longitudinal relationship of physical activity with insulin sensitivity in overweight and obese pregnant women. *Journal of Clinical Endocrinology & Metabolism.* 2013. 98:2929-2935 |
| **M. N. van Poppel, N. Oostdam, M. E. Eekhoff, M. G. Wouters, W. van Mechelen and P. M. Catalano.** Longitudinal relationship of physical activity with insulin sensitivity in overweight and obese pregnant women. 2013. 98:2929-2935 |
| **M. Nayak, M. E. Eekhoff, M. Peinhaupt, A. Heinemann, G. Desoye and M. N. van Poppel.** Cytokines and their association with insulin resistance in obese pregnant women with different levels of physical activity. 2016. 77:72-78 |
| **M. Pelaez, S. Gonzalez-Cerron, R. Montejo and R. Barakat.** Pelvic floor muscle training included in a pregnancy exercise program is effective in primary prevention of urinary incontinence: a randomized controlled trial. 2014. 33:67-71 |
| **M. Peoples-Sheps, E. Siegel, C. M. Suchindran, H. Origasa, A. Ware and A. Barakat.** PMC1405728; Characteristics of maternal employment during pregnancy: effects on low birthweight. *Am.J.Public Health.* 1991. 81:1007-1012 |
| **M. Perales, A. Santos-Lozano, F. Sanchis-Gomar, et al.** Maternal Cardiac Adaptations to a Physical Exercise Program during Pregnancy. *Medicine & Science in Sports & Exercise.* 2016. 48:896-906 |
| **M. Perales, I. Calabria, C. Lopez, E. Franco, J. Coteron and R. Barakat.** Regular Exercise Throughout Pregnancy Is Associated With a Shorter First Stage of Labor. *American Journal of Health Promotion.* 2016. 30:149-154 |
| **M. Perales, M. Luaces, M. I. Barriopedro, R. Montejo and R. Barakat.** Effects of a supervised exercise program on cardiac structure during pregnancy. Randomized clinical trial. Spanish]. *Progresos de Obstetricia y Ginecologia.* 2012. 55:209-215 |
| **M. Perales, M. Luaces, M. I. Barriopedro, R. Montejo and R. Barakat.** Effects of a supervised exercise program on cardiac structure during pregnancy. Randomized clinical trial. [Spanish]. 2012. 55:209-215 |
| **M. Perales, S. Mateos, M. Vargas, I. Sanz, A. Lucia and R. Barakat.** Fetal and maternal heart rate responses to exercise in pregnant women. A randomized controlled trial. *Archivos de Medicina del Deporte.* 2015. 32:361-367 |
| **M. Perales, Y. Cordero, M. Vargas, A. Lucia and R. Barakat.** Exercise and depression in overweight and obese pregnant women: A randomised controlled trial. *Archivos de Medicina del Deporte.* 2015. 32:156-163 |
| **M. Persson, A. Winkvist and I. Mogren.** PMC4372034; Lifestyle and health status in a sample of Swedish women four years after pregnancy: a comparison of women with a history of normal pregnancy and women with a history of gestational diabetes mellitus. *BMC Pregnancy & Childbirth.* 2015. 15:57 |
| **M. R. Domingues and A. J. Barros.** Leisure-time physical activity during pregnancy in the 2004 Pelotas Birth Cohort Study.[Erratum appears in Rev Saude Publica. 2007 Jun;41(3):493]. 2007. 41:173-180 |
| **M. R. Domingues, A. J. Barros and A. Matijasevich.** Leisure time physical activity during pregnancy and preterm birth in Brazil. *International Journal of Gynaecology & Obstetrics.* 2008. 103:9-15 |
| **M. R. Domingues, A. Matijasevich, A. J. Barros, I. S. Santos, B. L. Horta and P. C. Hallal.** PMC4211660; Physical activity during pregnancy and offspring neurodevelopment and IQ in the first 4 years of life. *PLoS ONE Electronic Resource].* 2014. 9:e110050 |
| **M. R. Jackson, P. Gott, S. J. Lye, J. W. Ritchie and J. F. Clapp 3.** The effects of maternal aerobic exercise on human placental development: placental volumetric composition and surface areas. *Placenta.* 1995. 16:179-191 |
| **M. R. Marshall and J. M. Pivarnik.** Perceived Exertion of Physical Activity During Pregnancy. 2015. 12:1039-1043 |
| **M. Rosediani, N. H. Nik Rosmawati, M. Juliawati and D. Norwati.** Knowledge, attitude and practice towards pelvic floor muscle exercise among pregnant women attending antenatal clinic in Universiti Sains Malaysia Hospital, Malaysia. 2012. 19:37-38 |
| **M. S. Maturi, P. Afshary and P. Abedi.** Effect of physical activity intervention based on a pedometer on physical activity level and anthropometric measures after childbirth: A randomized controlled trial. *BMC Pregnancy and Childbirth.* 2011. 11: |
| **M. S. Poudevigne and P. J. O'Connor.** Physical activity and mood during pregnancy. *Med.Sci.Sports Exerc.* 2005. 37:1374-1380 |
| **M. S. Rogers and B. Tomlinson.** Change in cardiovascular indices with position and isometric exercise throughout pregnancy: Assessment by impedance cardiography and oscillometric sphygmomanometry. *Hypertension in Pregnancy.* 1998. 17:191-202 |
| **M. S. Rogers and C. Hung.** Change in mean arterial pressure following isometric exercise in normotensive and hypertensive pregnancy: Validation of a continuous blood pressure monitor. 1996. 15:211-218 |
| **M. S. Treuth, N. F. Butte and M. Puyau.** Pregnancy-related changes in physical activity, fitness, and strength. *Med.Sci.Sports Exerc.* 2005. 37:832-837 |
| **M. S. Treuth, N. F. Butte and M. Puyau.** Pregnancy-related changes in physical activity, fitness, and strength. 2005. 37:832-837 |
| **M. S. Wingate, S. Swaminathan and G. R. Alexander.** The influence of maternal mobility on birth outcomes of non-hispanic blacks. *Maternal & Child Health Journal.* 2009. 13:48-55 |
| **M. San Juan Dertkigil, J. G. Cecatti, M. A. Sarno, S. R. Cavalcante and E. F. Marussi.** Variation in the amniotic fluid index following moderate physical activity in water during pregnancy. 2007. 86:547-552 |
| **M. Satyapriya, H. R. Nagendra, R. Nagarathna and V. Padmalatha.** Effect of integrated yoga on stress and heart rate variability in pregnant women. *International Journal of Gynecology and Obstetrics.* 2009. 104:218-222 |
| **M. Satyapriya, R. Nagarathna, V. Padmalatha and H. R. Nagendra.** Effect of integrated yoga on anxiety, depression & well being in normal pregnancy. 2013. 19:230-236 |
| **M. Saurel-Cubizolles, D. Subtil and M. Kaminski.** PMC1060698; Is preterm delivery still related to physical working conditions in pregnancy?. *Journal of Epidemiology & Community Health.* 1991. 45:29-34 |
| **M. Saurel-Cubizolles, M. Kaminski, C. Du Mazaubrun, J. Llado and M. Estryn-Behar.** High blood pressure during pregnancy and working conditions among hospital personnel. *European Journal of Obstetrics, Gynecology, & Reproductive Biology.* 1991. 40:29-34 |
| **M. Shafiee and M. Rostami.** Comparison between the effect of lumbopelvic belt and home based pelvic stabilizing exercise on pregnant women with pelvic girdle pain; A randomized controlled trial. *Eur.J.Med.Res.* 2011. 16:35 |
| **M. Sillero-Quintana, E. Conde-Pascual, P. Gomez-Carmona, I. Fernandez-Cuevas and T. Garcia-Pastor.** Effect of yoga and swimming on body temperature of pregnant women. *Thermology International.* 2012. 22 (3):108 |
| **M. Skreden, N. C. Overby, L. R. Sagedal, et al.** Changes in mode of transportation to work or school from pre-pregnancy to early pregnancy in the Norwegian Fit for Delivery study. *Preventive Medicine Reports.* 2015. 2:429-435 |
| **M. Skreden, N. C. Overby, L. R. Sagedal, et al.** PMC4730776; Change in active transportation and weight gain in pregnancy. *International Journal of Behavioral Nutrition & Physical Activity.* 2016. 13:10 |
| **M. Slater, L. Spector, A. Linabery, C. Blair and J. Ross.** Physical activity during early pregnancy and infant birth size. *Am.J.Epidemiol.* 2012. 175:S24 |
| **M. St Leger Dowse, A. Gunby, R. Moncad, C. Fife and P. Bryson.** Scuba diving and pregnancy: can we determine safe limits?. 2006. 26:509-513 |
| **M. Strom, E. L. Mortensen, T. I. Halldorson, M. L. Osterdal and S. F. Olsen.** Leisure-time physical activity in pregnancy and risk of postpartum depression: a prospective study in a large national birth cohort. 2009. 70:1707-1714 |
| **M. Tanvig, C. A. Vinter, J. S. Jorgensen, et al.** Effects of lifestyle intervention in pregnancy and anthropometrics at birth on offspring metabolic profile at 2.8 years: results from the Lifestyle in Pregnancy and Offspring (LiPO) study. *Journal of Clinical Endocrinology & Metabolism.* 2015. 100:175-183 |
| **M. Teychenne, G. Abbott, der Pligt van, et al.** Associations between physical activity, television viewing and postnatal depressive symptoms amongst healthy primiparous mothers. *Mental Health and Physical Activity.* 2016. 10:62-67 |
| **M. Ussher, P. Aveyard, T. Coleman, et al.** Physical activity as an aid to smoking cessation during pregnancy: two feasibility studies. 2008. 8:328 |
| **M. Ussher, S. Lewis, P. Aveyard, et al.** Physical activity for smoking cessation in pregnancy: randomised controlled trial. 2015. 350:h2145 |
| **M. Ussher, S. Lewis, P. Aveyard, et al.** The London Exercise And Pregnant smokers (LEAP) trial: a randomised controlled trial of physical activity for smoking cessation in pregnancy with an economic evaluation. 2015. 19:1-136 |
| **M. V. Auerbach, M. Lobel and D. T. Cannella.** Psychosocial correlates of health-promoting and health-impairing behaviors in pregnancy. 2014. 35:76-83 |
| **M. V. Bobic, D. Habek and J. C. Habek.** Perinatal epidemiological risk factors for preeclampsia. 2015. 54:9-13 |
| **M. Van Melick.** Working conditions and preterm birth in multiple pregnancies. *Obstet.Gynecol.* 2012. 206:S230 |
| **M. Van Poppel, N. Oostdam, M. Eekhoff and W. Van Mechelen.** Physical activity and maternal glucose and insulin in pregnant overweight and obese women. *Journal of Science and Medicine in Sport.* 2012. 15:S340 |
| **M. Varner.** Do subsequent pregnancies following the diagnosis of mild gestational diabetes increase the risk of maternal cardiometabolic disorders?. *Obstet.Gynecol.* 2016. 214:S169 |
| **M. W. Blackburn and D. H. Calloway.** Heart rate and energy expenditure of pregnant and lactating women. 1985. 42:1161-1169 |
| **M. W. Carpenter, S. P. Sady, B. Hoegsberg, et al.** Fetal heart rate response to maternal exertion. *JAMA.* 1988. 259:3006-3009 |
| **M. W. Carpenter, S. P. Sady, M. A. Sady, B. Haydon, D. R. Coustan and P. D. Thompson.** Effect of maternal weight gain during pregnancy on exercise performance. 1990. 68:1173-1176 |
| **M. W. Chang, S. Nitzke, D. Buist, D. Cain, S. Horning and K. Eghtedary.** I am pregnant and want to do better but i can't: focus groups with low-income overweight and obese pregnant women. 2015. 19:1060-1070 |
| **M. Xiang, M. Konishi, H. Hu, et al.** Reliability and Validity of a Chinese-Translated Version of a Pregnancy Physical Activity Questionnaire. *Maternal & Child Health Journal.* 2016. 25:25 |
| **M. Y. Takito and M. H. D. A. Benicio.** Physical activity during pregnancy and fetal outcomes: A case-control study. Portuguese]. *Rev.Saude Publica.* 2010. 44:90-101 |
| **M. Zeanah and S. P. Schlosser.** Adherence to ACOG guidelines on exercise during pregnancy: effect on pregnancy outcome. *JOGNN - Journal of Obstetric, Gynecologic, & Neonatal Nursing.* 1993. 22:329-335 |
| **Marci Lobel, Dolores Lacey Cannella, Jennifer E. Graham, Carla DeVincent, Jayne Schneider and Bruce A. Meyer.** Pregnancy-specific stress, prenatal health behaviors, and birth outcomes. *Health Psychology.* 2008. 27:604-615 |
| **Maria Zamora-Flyr.** Predictors of intention and performance of physical activity of pregnant Hispanic women. *Dissertation Abstracts International: Section B: The Sciences and Engineering.* 2011. 71:6077 |
| **Marianne Skreden, Nina C. Overby, Linda R. Sagedal, et al.** Change in active transportation and weight gain in pregnancy. *The International Journal of Behavioral Nutrition and Physical Activity Vol 13 2016, ArtID 10.* 2016. 13: |
| **Marushka Silveira, Penelope Pekow, Nancy Dole, Glenn Markenson and Lisa Chasan-Taber.** Correlates of High Perceived Stress Among Pregnant Hispanic Women in Western Massachusetts. 2013. 17:1138-1150 13 |
| **Miguel A. Diego, John N. Dieter, Tiffany Field, et al.** Fetal activity following stimulation of the mother's abdomen, feet and hands. *Dev.Psychobiol.* 2002. 41:396-406 |
| **Monika Guszkowska.** Physical activity in relation to affective states and labor anxiety in pregnant women. 2011. 15:114-118 |
| **N. A. Mohd-Shukri, A. Duncan, F. C. Denison, et al.** Health Behaviours during Pregnancy in Women with Very Severe Obesity. 2015. 7:8431-8443 |
| **N. Al-Azemi, M. F. Diejomaoh, E. Angelaki and A. T. Mohammed.** Clinical presentation and management of diabetes mellitus in pregnancy. 2014. 6: |
| **N. Barbari, L. May, E. Newton and J. Livingston.** Influence of exercise in pregnancy on fetal heart response during labor and delivery. *FASEB Journal.* 2014. 1): |
| **N. Boscaglia, H. Skouteris and E. H. Wertheim.** Changes in body image satisfaction during pregnancy: a comparison of high exercising and low exercising women. 2003. 43:41-45 |
| **N. C. Harvey, J. R. Poole, M. K. Javaid, et al.** Parental determinants of neonatal body composition. 2007. 92:523-526 |
| **N. C. Harvey, J. R. Poole, M. K. Javaid, et al.** PMC2080689 UKMS1164; Parental determinants of neonatal body composition. *Journal of Clinical Endocrinology & Metabolism.* 2007. 92:523-526 |
| **N. C. Harvey, M. K. Javaid, N. K. Arden, et al.** EMS28000 PMC3672833; Maternal predictors of neonatal bone size and geometry: the Southampton Women's Survey. *Journal of Developmental Origins of Health and Disease.* 2010. 1:35-41 |
| **N. C. Harvey, M. K. Javaid, N. K. Arden, et al.** Maternal predictors of neonatal bone size and geometry: the Southampton Women's Survey. 2010. 1:35-41 |
| **N. C. Nguyen, K. R. Evenson, D. A. Savitz, H. Chu, J. M. Thorp and J. L. Daniels.** NIHMS384562 PMC3459289; Physical activity and maternal-fetal circulation measured by Doppler ultrasound. *Journal of Perinatology.* 2013. 33:87-93 |
| **N. C. Rose, J. E. Haddow, G. E. Palomaki and G. J. Knight.** Self-rated physical activity level during the second trimester and pregnancy outcome. *Obstetrics & Gynecology.* 1991. 78:1078-1080 |
| **N. Cherry.** Physical demands of work and health complaints among women working late in pregnancy. *Ergonomics.* 1987. 30:689-701 |
| **N. D. Avery, K. D. Stocking, J. E. Tranmer, G. A. Davies and L. A. Wolfe.** Fetal responses to maternal strength conditioning exercises in late gestation. *Canadian Journal of Applied Physiology.* 1999. 24:362-376 |
| **N. D. Avery, L. A. Wolfe, C. E. Amara, G. A. Davies and M. J. McGrath.** Effects of human pregnancy on cardiac autonomic function above and below the ventilatory threshold. *J.Appl.Physiol.* 2001. 90:321-328 |
| **N. Daly, C. Mitchell, M. Farren, M. M. Kennelly, J. Hussey and M. J. Turner.** Maternal obesity and physical activity and exercise levels as pregnancy advances: an observational study. 2015. |
| **N. de Keyser, A. Josefsson, W. G. Monfils, et al.** Total cost comparison of standard antenatal care with a weight gain restriction programme for obese pregnant women. 2011. 125:311-317 |
| **N. H. Hjollund, T. K. Jensen, J. P. Bonde, et al.** Spontaneous abortion and physical strain around implantation: a follow-up study of first-pregnancy planners. 2000. 11:18-23 |
| **N. Hatoum, J. F. Clapp 3, M. R. Newman, N. Dajani and S. B. Amini.** Effects of maternal exercise on fetal activity in late gestation. *J.Matern.Fetal.* 1997. 6:134-139 |
| **N. J. Secher.** The Treatment of Obese Pregnant Women (TOP) study: a randomized controlled trial of the effect of physical activity intervention assessed by pedometer with or without dietary intervention in obese pregnant women. *Obstet.Gynecol.* 2014. 210:134.e1-134.e9 |
| **N. Khodiguian, S. V. Jaque-Fortunato, R. A. Wiswell and R. Artal.** A comparison of cross-sectional and longitudinal methods of assessing the influence of pregnancy on cardiac function during exercise. 1996. 20:232-241 |
| **N. M. Evensen, A. Kvale and I. H. Braekken.** Convergent validity of the Timed Up and Go Test and Ten-metre Timed Walk Test in pregnant women with pelvic girdle pain. *Man.Ther.* 2016. 21:94-99 |
| **N. M. Rafla and G. A. Etokowo.** The effect of maternal exercise on uterine artery velocimetry waveforms. *Journal of Obstetrics and Gynaecology.* 1998. 18:14-17 |
| **N. M. Rafla and J. M. Beazely.** The effect of maternal exercise on fetal umbilical artery waveforms. *European Journal of Obstetrics, Gynecology, & Reproductive Biology.* 1991. 40:119-122 |
| **N. M. Rafla and J. R. Cook.** The effect of maternal exercise on fetal heart rate. *Journal of Obstetrics & Gynaecology.* 1999. 19:381-384 |
| **N. M. Rafla and N. L. Whitelaw.** The effect of maternal exercise on fetal aortic blood flow. *Journal of Obstetrics and Gynaecology.* 1996. 16:342-346 |
| **N. M. Rafla.** The effect of maternal exercise on umbilical artery blood flow in insulin-dependent diabetics. *Journal of Obstetrics & Gynaecology.* 2000. 20:606-609 |
| **N. M. Rafla.** Umbilical artery flow velocity waveforms following maternal exercise. *Journal of Obstetrics and Gynaecology.* 1999. 19:385-389 |
| **N. Mamelle, I. Bertucat and F. Munoz.** Pregnant women at work: rest periods to prevent preterm birth?. *Paediatr.Perinat.Epidemiol.* 1989. 3:19-28 |
| **N. Morris, S. B. Osborn, H. Payling Wright and A. Hart.** Effective uterine blood-flow during exercise in normal and pre-eclamptic pregnancies. *The Lancet.* 1956. 268:481-484 |
| **N. Morris, S. B. Osborn, H. Payling Wright and A. Hart.** Effective uterine blood-flow during exercise in normal and pre-eclamptic pregnancies. 1956. 268:481-484 |
| **N. N. de Alcantara, S. H. O. Jardim, D. F. M. Vitorino and V. P. de Lima.** Influence of hydrotherapy in cardiorespiratory parameters during pregnancy. *Revista Neurociencias.* 2012. 20:372-378 |
| **N. Nelson, S. Jenkins, C. Lessard-Anderson and K. Borowski.** Exercise habits during pregnancy and correlation with weight gain and obstetric outcomes. *Obstet.Gynecol.* 2016. 127:153S |
| **N. Oostdam, J. Bosmans, M. G. Wouters, E. M. Eekhoff, W. van Mechelen and M. N. van Poppel.** Cost-effectiveness of an exercise program during pregnancy to prevent gestational diabetes: results of an economic evaluation alongside a randomised controlled trial. 2012. 12:64 |
| **N. P. Joshi, S. R. Kulkarni, C. S. Yajnik, et al.** Increasing maternal parity predicts neonatal adiposity: Pune Maternal Nutrition Study. 2005. 193:783-789 |
| **N. Padmapriya, L. Shen, S. E. Soh, et al.** Physical Activity and Sedentary Behavior Patterns Before and During Pregnancy in a Multi-ethnic Sample of Asian Women in Singapore. *Matern.Child Health J.* 2015. 19:2523-2535 |
| **N. Padmapriya, L. Shen, S. E. Soh, et al.** Physical Activity and Sedentary Behavior Patterns Before and During Pregnancy in a Multi-ethnic Sample of Asian Women in Singapore. 2015. 19:2523-2535 |
| **N. Prabhu.** Effect of a exercise by pregnant women and birth weight: a randomized controlled trial. *Journal of Evolution of Medical and Dental Sciences-Jemds.* 2015. 4:1509-1516 |
| **N. Tafari, R. L. Naeye and A. Gobezie.** Effects of maternal undernutrition and heavy physical work during pregnancy on birth weight. *British Journal of Obstetrics & Gynaecology.* 1980. 87:222-226 |
| **N. Voldner, K. F. Froslie, K. Bo, et al.** Modifiable determinants of fetal macrosomia: role of lifestyle-related factors. *Acta Obstet.Gynecol.Scand.* 2008. 87:423-429 |
| **N. Voldner, K. F. Froslie, L. A. Haakstad, K. Bo and T. Henriksen.** Birth complications, overweight, and physical inactivity. 2009. 88:550-555 |
| **Nct, R. Barakat and M. Perales.** Effect of a Supervised Exercise Program During Whole Pregnancy on Outcomes and Level of Depression. A Randomized Controlled Trial. 2009. |
| **NDesai O. Singh.** Prevention and management of low backache in pregnant women through the use of exercise program and education booklet. 2008. 39:65-72 |
| **O. Kgosidialwa, A. M. Egan, L. Carmody, B. Kirwan, P. Gunning and F. P. Dunne.** Treatment With Diet and Exercise for Women With Gestational Diabetes Mellitus Diagnosed Using IADPSG Criteria. 2015. 100:4629-4636 |
| **O. M. Hellenes, T. Vik, G. C. Lohaugen, et al.** Regular moderate exercise during pregnancy does not have an adverse effect on the neurodevelopment of the child. *Acta Paediatrica.* 2015. 104:285-291 |
| **O. R. Anitha, S. Johncy and S. Y. Bondade.** Study of effect of exercise on PEFR in pregnant women. 2015. 5:89-92 |
| **O. Roldán, M. Perales, S. Mateos and R. Barakat.** Supervised physical activity during pregnancy improves fetal cardiac response. / el ejercicio físico supervisado durante el embarazo mejora la respuesta cardiaca fetal. *Revista Internacional de Medicina y Ciencias de la Actividad F.* 2015. 15:757-772 |
| **O. Taskin, J. M. Wheeler, A. I. Yalcinoglu and S. Coksenim.** The effects of episiotomy and Kegel exercises on postpartum pelvic relaxation: A prospective controlled study. 1996. 12:123-127 |
| **Olga S. Denda, Maria S. Denda, Anastasios X. Dalkiranis, Basiliki S. Lyssa and Mylonas Argyrios.** The effect of some dietary components on body weight and fat deposition in pregnant women in combination with exercise during pregnancy and postpartum period. 2005. 12:25-30 |
| **Oliveria Melo de, J. L. Silva, J. S. Tavares, V. O. Barros, D. F. Leite and M. M. Amorim.** Effect of a physical exercise program during pregnancy on uteroplacental and fetal blood flow and fetal growth: a randomized controlled trial. *Obstetrics & Gynecology.* 2012. 120:302-310 |
| **P. A. Nixon, L. K. Washburn, L. M. Mudd, et al.** Aerobic fitness and physical activity levels of children born prematurely following randomization to postnatal dexamethasone. *J.Pediatr.* 2011. 158:113-118 |
| **P. Abirami and A. Judie.** Integrated approach of yoga therapy on maternal and fetal outcome in gestational diabetes mellitus. *International Journal of Pharmaceutical and Clinical Research.* 2015. 7:377-382 |
| **P. Bahadoran and S. Mohamadirizi.** PMC4387656; Relationship between physical activity and quality of life in pregnant women. *Iranian Journal of Nursing and Midwifery Research.* 2015. 20:282-286 |
| **P. Bahadoran and S. Mohamadirizi.** PMC4946278; The study of physical activity and some relative factors in referred pregnant women to Isfahan Health-Care Centers and Shahid Beheshti Hospital. *Journal of Education & Health Promotion.* 2015. 4:100 |
| **P. Bahadoran and S. Mohamadirizi.** Relationship between physical activity and quality of life in pregnant women. 2015. 20:282-286 |
| **P. Bahadoran, F. Pouya, V. Zolaktaf and M. Taebi.** The effect of stretching exercise and walking on changes of blood pressure in nulliparous women. 2015. 20:205-210 |
| **P. Bergamaschi, E. Capodaglio and B. Fre.** Cardio-respiratory and metabolic aspects of muscular work in pregnancy. Italian]. *Minerva Ginecol.* 1964. 16:831-838 |
| **P. Bonnin, C. Bazzi-Grossin, N. Ciraru-Vigneron, et al.** Evidence of fetal cerebral vasodilatation induced by submaximal maternal dynamic exercise in human pregnancy. *J.Perinat.Med.* 1997. 25:63-70 |
| **P. Bung, C. Bung, R. Artal, N. Khodiguian, F. Fallenstein and L. Spatling.** Therapeutic exercise for insulin-requiring gestational diabetics: effects on the fetus--results of a randomized prospective longitudinal study. *J.Perinat.Med.* 1993. 21:125-137 |
| **P. C. Ko, C. C. Liang, S. D. Chang, J. T. Lee, A. S. Chao and P. J. Cheng.** A randomized controlled trial of antenatal pelvic floor exercises to prevent and treat urinary incontinence. 2011. 22:17-22 |
| **P. C. Santos, S. Abreu, C. Moreira, et al.** Impact of compliance with different guidelines on physical activity during pregnancy and perceived barriers to leisure physical activity. 2014. 32:1398-1408 |
| **P. C. Santos, S. Abreu, C. Moreira, et al.** PMC4884625; Physical Activity Patterns During Pregnancy in a Sample of Portuguese Women: A Longitudinal Prospective Study. *Iranian Red Crescent Medical Journal.* 2016. 18:e22455 |
| **P. D. Loprinzi, E. M. Fitzgerald and B. J. Cardinal.** Physical Activity and Depression Symptoms among Pregnant Women from the National Health and Nutrition Examination Survey 2005-2006. *JOGNN - Journal of Obstetric, Gynecologic, and Neonatal Nursing.* 2012. 41:227-235 |
| **P. D. Loprinzi, E. M. Fitzgerald and B. J. Cardinal.** Physical activity and depression symptoms among pregnant women from the National Health and Nutrition Examination Survey 2005-2006. 2012. 41:227-235 |
| **P. D. Loprinzi, E. M. Fitzgerald, E. Woekel and B. J. Cardinal.** Association of physical activity and sedentary behavior with biological markers among U.S. pregnant women. 2013. 22:953-958 |
| **P. D. Loprinzi, K. L. Loprinzi and B. J. Cardinal.** The relationship between physical activity and sleep among pregnant women. 2012. 5:22-27 |
| **P. Dwarkanath, S. Muthayya, M. Vaz, et al.** The relationship between maternal physical activity during pregnancy and birth weight. *Asia Pac.J.Clin.Nutr.* 2007. 16:704-710 |
| **P. E. Clarke and H. Gross.** Women's behaviour, beliefs and information sources about physical exercise in pregnancy. *Midwifery.* 2004. 20:133-141 |
| **P. E. Clarke, E. K. Rousham, H. Gross, A. W. Halligan and P. Bosio.** Activity patterns and time allocation during pregnancy: a longitudinal study of British women. 2005. 32:247-258 |
| **P. E. Watson and B. W. McDonald.** Activity levels in pregnant New Zealand women: relationship with socioeconomic factors, well-being, anthropometric measures, and birth outcome. *Applied Physiology, Nutrition, & Metabolism = Physiologie Appliquee, Nutrition et Metabolisme.* 2007. 32:733-742 |
| **P. Eisenberg de Smoler, C. Dominguez de Costa, R. Mejia de Cabrera and S. Karchmer.** [External fetal electrocardiography, the maternal effort test and the oxytocin challenge in cases of fetomaternal rhesus isoimmunisation (author's transl)]. 1979. 8:137-142 |
| **P. Ewings, S. Spencer, H. Marsh and M. O'Sullivan.** Obstetric risk factors for urinary incontinence and preventative pelvic floor exercises: cohort study and nested randomized controlled trial.Erratum appears in J Obstet Gynaecol. 2005 Nov;25(8):834-5]. *Journal of Obstetrics & Gynaecology.* 2005. 25:558-564 |
| **P. G. Lindqvist, K. Marsal, J. Merlo and J. P. Pirhonen.** Thermal response to submaximal exercise before, during and after pregnancy: a longitudinal study. *Journal of Maternal-Fetal & Neonatal Medicine.* 2003. 13:152-156 |
| **P. Gawade, P. Pekow, G. Markenson, M. Plevyak, W. Goh and L. Chasan-Taber.** Physical activity before and during pregnancy and duration of second stage of labor among Hispanic women. *J.Reprod.Med.* 2009. 54:429-435 |
| **P. J. Kulpa, B. M. White and R. Visscher.** Aerobic exercise in pregnancy. *American Journal of Obstetrics & Gynecology.* 1987. 156:1395-1403 |
| **P. J. O'Connor, M. S. Poudevigne, M. E. Cress, R. W. Motl and J. F. Clapp 3rd.** Safety and efficacy of supervised strength training adopted in pregnancy. 2011. 8:309-320 |
| **P. J. Ohtake and L. A. Wolfe.** Physical conditioning attenuates respiratory responses to steady-state exercise in late gestation. *Med.Sci.Sports Exerc.* 1998. 30:17-27 |
| **P. J. Reis and M. R. Alligood.** Prenatal yoga in late pregnancy and optimism, power, and well-being. 2014. 27:30-36 |
| **P. Kolu, J. Raitanen and R. Luoto.** Physical activity and health-related quality of life during pregnancy: a secondary analysis of a cluster-randomised trial. 2014. 18:2098-2105 |
| **P. Kolu, J. Raitanen, P. Rissanen and R. Luoto.** Cost-effectiveness of lifestyle counselling as primary prevention of gestational diabetes mellitus: findings from a cluster-randomised trial. 2013. 8:e56392 |
| **P. L. Chou, F. P. Chen and L. F. Teng.** Factors associated with urinary stress incontinence in primiparas. *Taiwanese Journal of Obstetrics and Gynecology.* 2005. 44:42-47 |
| **P. L. Rice and I. L. Fort.** The relationship of maternal exercise on labor, delivery and health of the newborn. *Journal of Sports Medicine & Physical Fitness.* 1991. 31:95-99 |
| **P. L. Thornton, E. C. Kieffer, Y. Salabarria-Pena, et al.** Weight, diet, and physical activity-related beliefs and practices among pregnant and postpartum Latino women: the role of social support. *Maternal & Child Health Journal.* 2006. 10:95-104 |
| **P. M. Catalano, K. Farrell, A. Thomas, et al.** Perinatal risk factors for childhood obesity and metabolic dysregulation. 2009. 90:1303-1313 11 |
| **P. Magnus, L. Trogstad, K. M. Owe, S. F. Olsen and W. Nystad.** Recreational physical activity and the risk of preeclampsia: a prospective cohort of Norwegian women. 2008. 168:952-957 |
| **P. Moreira, C. Padez, I. Mourao-Carvalhal and V. Rosado.** Maternal weigh gain during pregnancy and overweight in Portuguese children. *Int.J.Obes.* 2007. 31:608-614 |
| **P. Mota, A. G. Pascoal, A. I. Carita and K. Bo.** The Immediate Effects on Inter-rectus Distance of Abdominal Crunch and Drawing-in Exercises During Pregnancy and the Postpartum Period. 2015. 45:781-788 |
| **P. N. Horns, L. P. Ratcliffe, J. C. Leggett and M. S. Swanson.** Pregnancy outcomes among active and sedentary primiparous women. *JOGNN - Journal of Obstetric, Gynecologic, & Neonatal Nursing.* 1996. 25:49-54 |
| **P. Rodrigues, E. Yamada, C. Simmer, K. Santos, K. Rangel and L. Prudente.** Efficacy of therapeutic exercises and superficial heat in the posterior lumbar pelvic pain during pregnancy. *Physiotherapy (United Kingdom).* 2011. 97:eS1050-eS1051 |
| **P. S. Alm, A. Krook and T. D. Barbosa.** Maternal obesity legacy: exercise it away!. *Diabetologia.* 2016. 59:5-8 |
| **P. S. Larsen, K. Strandberg-Larsen, M. Juhl, S. W. Svendsen, J. P. Bonde and A. M. Andersen.** Occupational lifting and pelvic pain during pregnancy: a study within the Danish National Birth Cohort. 2013. 39:88-95 |
| **P. S. Rusinski.** The employed pregnant worker: the risks of physical exertion. 1981. 29:19-21 |
| **P. Sedaghati, V. Ziaee and A. Ardjmand.** The effect of an ergometric training program on pregnants weight gain and low back pain. *Gazzetta Medica Italiana Archivio per le Scienze Mediche.* 2007. 166:209-213 |
| **P. Tuntiseranee, A. Geater, V. Chongsuvivatwong and O. Kor-anantakul.** The effect of heavy maternal workload on fetal growth retardation and preterm delivery. A study among southern Thai women. *Journal of Occupational & Environmental Medicine.* 1998. 40:1013-1021 |
| **P. Van Leeuwen, K. M. Gustafson, D. Cysarz, D. Geue, L. E. May and D. Gronemeyer.** PMC4146588; Aerobic exercise during pregnancy and presence of fetal-maternal heart rate synchronization. *PLoS ONE Electronic Resource].* 2014. 9:e106036 |
| **P. W. Bauer, J. M. Pivarnik, D. L. Feltz, N. Paneth and C. J. Womack.** Relationship of Past-Pregnancy Physical Activity and Self-efficacy With Current Physical Activity and Postpartum Weight Retention. 2014. 8:68-73 |
| **Palmira Sort-Travesset, Aurora Beltrán-Molina and Ángela Mens-Pueyo.** Working with the body the experience of becoming a mother [sic]. 2010. 14:173-176 4 |
| **Paula Costa Teixeira, Melanie Poudevigne, Sandra Marcela Mahecha Matsudo and Victor Keihan Rodrigues Matsudo.** Physical activity patterns and daily steps in brazilian pregnant women's sample. 2011. 15:44-50 |
| **Pavelas Zachovajevas, Brigita Zachovajevienė, Jūratė Banionytė and Arvydas Siaurodinas.** Physical therapy and maternity support garment: influence on core stability and low back pain during pregnancy and after delivery. / kineziterapijos ir korseto poveikis liemens stabilumui ir apatinės nugaros dalies skausmui nėštumo metu ir po gimdymo. 2012. 86:99-106 |
| **Phyllis Miller.** Reducing risks during pregnancy. 1986. 8:207-212 |
| **Piyanun Limruangrong, Nittaya Sinsuksai, Ameporn Ratinthorn and Dittakarn Boriboonhirunsarn.** Effectiveness of a self-regulation program on diet control, exercise, and two-hour postprandial blood glucose levels in Thais with gestational diabetes mellitus. 2011. 15:173-186 14 |
| **Praween Agrawal, Vinod Mishra and Sutapa Agrawal.** Covariates of maternal overweight and obesity and the risk of adverse pregnancy outcomes: findings from a nationwide cross sectional survey. 2012. 20:387-397 11 |
| **Q. Li, R. Xiong, L. Wang, et al.** Associations of dietary habits, physical activity and cognitive views with gestational diabetes mellitus among Chinese women. *Public Health Nutr.* 2014. 17:1850-1857 |
| **R. A. Bader, M. E. Bader, D. J. Rose and E. Braunwald.** Hemodynamics at rest and during exercise in normal pregnancy as studied by cardiac catheterization. 1956. 11:470-472 |
| **R. A. Jackson, N. E. Stotland, A. B. Caughey and B. Gerbert.** Improving diet and exercise in pregnancy with Video Doctor counseling: A randomized trial. *Patient Educ.Couns.* 2011. 83:203-209 |
| **R. A. Maitland, P. T. Seed, A. L. Briley, et al.** Prediction of gestational diabetes in obese pregnant women from the UK Pregnancies Better Eating and Activity (UPBEAT) pilot trial. *Diabetic Med.* 2014. 31:963-970 |
| **R. A. Schlaff, C. Holzman, K. S. Maier, K. A. Pfeiffer and J. M. Pivarnik.** Associations among gestational weight gain, physical activity, and pre-pregnancy body size with varying estimates of pre-pregnancy weight. 2014. 30:1124-1131 |
| **R. A. Schlaff, C. Holzman, L. M. Mudd, K. Pfeiffer and J. M. Pivarnik.** Body mass index is associated with appropriateness of weight gain but not leisure-time physical activity during pregnancy. 2014. 11:1593-1599 |
| **R. A. Tinius, A. G. Cahill, E. A. Strand and W. T. Cade.** Altered maternal lipid metabolism is associated with higher inflammation in obese women during late pregnancy. *Integrative Obesity & Diabetes.* 2015. 2:168-175 |
| **R. A. Tinius, A. G. Cahill, E. A. Strand and W. Todd Cade.** Maternal inflammation during late pregnancy is lower in physically active compared with inactive obese women. *Applied Physiology, Nutrition and Metabolism.* 2015. 41:191-198 |
| **R. Artal, D. I. Masaki, N. Khodiguian, Y. Romem, S. E. Rutherford and R. A. Wiswell.** Exercise prescription in pregnancy: weight-bearing versus non-weight-bearing exercise. *American Journal of Obstetrics & Gynecology.* 1989. 161:1464-1469 |
| **R. Artal, R. Wiswell, Y. Romem and F. Dorey.** Pulmonary responses to exercise in pregnancy. *American Journal of Obstetrics & Gynecology.* 1986. 154:378-383 |
| **R. Artal, V. Fortunato, A. Welton, et al.** A comparison of cardiopulmonary adaptations to exercise in pregnancy at sea level and altitude. *American Journal of Obstetrics & Gynecology.* 1995. 172:1170-8; discussion 1178-80 |
| **R. Artal, Y. Romem, R. H. Paul and R. Wiswell.** Fetal bradycardia induced by maternal exercise. *Lancet.* 1984. 2:258-260 |
| **R. B. Carballo, G. A. Merino, M. R. Cabrero and J. J. R. González.** Physical exercise and pregnancy outcome. *Progresos en Obstetricia y Ginecologia.* 2006. 49:630-638 |
| **R. B. Gaskins, L. L. Lagasse, J. Liu, et al.** Small for gestational age and higher birth weight predict childhood obesity in preterm infants. *Am.J.Perinatol.* 2010. 27:721-730 |
| **R. Barakat and M. Perales.** Resistance exercise in pregnancy and outcome. *Clin.Obstet.Gynecol.* 2016. 59:591-599 |
| **R. Barakat Carballo, C. López Mas and R. Montejo Rodr**. Influence of physical exercise in the third quarter of pregnancy on cardiocirculatory behavior of the maternal-fetal unit. *Revista Andaluza de Medicina del Deporte.* 2010. 3:47-51 |
| **R. Barakat, A. Lucia and J. R. Ruiz.** Resistance exercise training during pregnancy and newborn's birth size: a randomised controlled trial. *Int.J.Obes.* 2009. 33:1048-1057 |
| **R. Barakat, G. Alonso and J. J. Rojo.** Physical exercise during pregnancy and its relationship with the duration of stages of labor. 2005. 48:61-68 |
| **R. Barakat, J. R. Ruiz and A. Lucia.** Exercise during pregnancy and risk of maternal anaemia: A randomised controlled trial. *Br.J.Sports Med.* 2009. 43:954-956 |
| **R. Barakat, J. R. Ruiz, G. Rodriguez-Romo, R. Montejo-Rodriguez and A. Lucia.** Does exercise training during pregnancy influence fetal cardiovascular responses to an exercise stimulus? Insights from a randomised, controlled trial. *Br.J.Sports Med.* 2010. 44:762-764 |
| **R. Barakat, J. R. Ruiz, J. R. Stirling, M. Zakynthinaki and A. Lucia.** Type of delivery is not affected by light resistance and toning exercise training during pregnancy: a randomized controlled trial. *Obstet.Gynecol.* 2009. 201:590.e1-590.e6 |
| **R. Barakat, J. R. Stirling and A. Lucia.** Does exercise training during pregnancy affect gestational age? A randomised controlled trial. 2008. 42:674-678 |
| **R. Barakat, M. Pelaez, C. Lopez, A. Lucia and J. R. Ruiz.** Exercise during pregnancy and gestational diabetes-related adverse effects: a randomised controlled trial. *Br.J.Sports Med.* 2013. 47:630-636 |
| **R. Barakat, M. Pelaez, R. Montejo, M. Luaces and M. Zakynthinaki.** Exercise during pregnancy improves maternal health perception: a randomized controlled trial. *Obstet.Gynecol.* 2011. 204: |
| **R. Barakat, M. Pelaez, Y. Cordero, et al.** Exercise during pregnancy protects against hypertension and macrosomia: randomized clinical trial. *American Journal of Obstetrics & Gynecology.* 2016. 214:649.e1-649.e8 |
| **R. Barakat, M. Perales, M. Bacchi, J. Coteron and I. Refoyo.** A program of exercise throughout pregnancy. Is it safe to mother and newborn?. *American Journal of Health Promotion.* 2014. 29:2-8 |
| **R. Barakat, Y. Cordero, J. Coteron, M. Luaces and R. Montejo.** Exercise during pregnancy improves maternal glucose screen at 24-28 weeks: a randomised controlled trial. *Br.J.Sports Med.* 2012. 46:656-661 |
| **R. Bell and S. Palma.** Antenatal exercise and birthweight. *Aust.N.Z.J.Obstet.Gynaecol.* 2000. 40:70-73 |
| **R. Bell, P. W. Tennant, C. McParlin, et al.** Measuring physical activity in pregnancy: a comparison of accelerometry and self-completion questionnaires in overweight and obese women. *European Journal of Obstetrics, Gynecology, & Reproductive Biology.* 2013. 170:90-95 |
| **R. Bgeginski, B. P. Almada and L. F. Kruel.** Fetal heart rate responses during maternal resistance exercise: a pilot study. *Revista Brasileira de Ginecologia e Obstetricia.* 2015. 37:133-139 |
| **R. Bgeginski, B. P. Almada and L. F. Martins Kruel.** Cardiorespiratory responses of pregnant and nonpregnant women during resistance exercise. *Journal of Strength and Conditioning Research.* 2015. 29:596-603 |
| **R. Bgeginski, B. P. Almada and L. F. Martins Kruel.** Cardiorespiratory responses of pregnant and nonpregnant women during resistance exercise. 2015. 29:596-603 |
| **R. C. Goodlin, K. L. Hoffmann, N. E. Williams and P. Buchan.** Shoulder-out immersion in pregnant women. 1984. 12:173-177 |
| **R. C. Green, K. Schneider and Lennan Ah Mac.** The fetal heart response to static antenatal exercises in the supine position. *Australian Journal of Physiotherapy.* 1988. 34:3-7 |
| **R. C. Green, K. Schneider and Lennan Ah Mac.** The fetal heart response to static antenatal exercises in the supine position. 1988. 34:3-7 |
| **R. C. Page, K. E. Harnden, N. K. Walravens, et al.** 'Healthy living' and sulphonylurea therapy have different effects on glucose tolerance and risk factors for vascular disease in subjects with impaired glucose tolerance. 1993. 86:145-154 |
| **R. Caldeyro-Barcia, G. Giussi, E. Storch, et al.** The bearing-down efforts and their effects on fetal heart rate, oxygenation and acid base balance. 1981. 9 Suppl 1:63-67 |
| **R. D. Gilbert, L. Lis and L. D. Longo.** Temperature effects on oxygen affinity of human fetal blood. *J.Dev.Physiol.* 1985. 7:299-304 |
| **R. D. Lewis, C. Y. Yates and J. A. Driskell.** Riboflavin and thiamin status and birth outcome as a function of maternal aerobic exercise. 1988. 48:110-116 |
| **R. E. Carpenter, L. A. D'Silva, S. J. Emery, O. Uzun, D. Rassi and M. J. Lewis.** Changes in heart rate variability and QT variability during the first trimester of pregnancy. 2015. 36:531-545 |
| **R. E. Carpenter, S. J. Emery, O. Uzun, D. Rassi and M. J. Lewis.** Influence of antenatal physical exercise on heart rate variability and QT variability. *Journal of Maternal-Fetal & Neonatal Medicine.* 2017. 30:79-84 |
| **R. E. Carpenter, S. J. Emery, O. Uzun, L. A. D'Silva and M. J. Lewis.** Influence of antenatal physical exercise on haemodynamics in pregnant women: A flexible randomisation approach. *BMC Pregnancy and Childbirth.* 2015. 15: |
| **R. E. Halse, K. E. Wallman, J. A. Dimmock, J. P. Newnham and K. J. Guelfi.** Home-Based Exercise Improves Fitness and Exercise Attitude and Intention in Women with GDM. *Medicine & Science in Sports & Exercise.* 2015. 47:1698-1704 |
| **R. Erkkola and L. Rauramo.** Correlation of maternal physical fitness during pregnancy with maternal and fetal pH and lactic acid at delivery. *Acta Obstet.Gynecol.Scand.* 1976. 55:441-446 |
| **R. Erkkola and M. Makela.** Heart volume and physical fitness of parturients. *Ann.Clin.Res.* 1976. 8:15-21 |
| **R. Erkkola.** The influence of physical training during pregnancy on physical work capacity and circulatory parameters. *Scand.J.Clin.Lab.Invest.* 1976. 36:747-754 |
| **R. Erkkola.** The physical fitness of Finnish primigravidae. 1975. 64:394-400 |
| **R. F. Dyck, M. S. Sheppard, H. Klomp, et al.** Using exercise to prevent gestational diabetes among aboriginal women -- hypothesis and results of a pilot/feasibility project in Saskatchewan. 1999. 23:32-38 7 |
| **R. F. Hume J., J. D. Bowie, C. McCoy, et al.** Fetal umbilical artery Doppler response to graded maternal aerobic exercise and subsequent maternal mean arterial blood pressure: predictive value for pregnancy-induced hypertension. *American Journal of Obstetrics & Gynecology.* 1990. 163:826-829 |
| **R. F. Martins and E. S. Pinto.** Treatment of pregnancy-related lumbar and pelvic girdle pain by the yoga method: A randomized controlled study. *Journal of Alternative and Complementary Medicine.* 2014. 20:24-31 |
| **R. F. Martins and Pinto e Silva, J. L.** Treatment of pregnancy-related lumbar and pelvic girdle pain by the yoga method: a randomized controlled study. 2014. 20:24-31 |
| **R. G. De Oliveira, A. A. Souza, J. A. S. Suassuna, et al.** Blood pressure and sympathovagal activity responses for one session of aerobic exercise in 12 to 20 weeks pregnant women. *Gazzetta Medica Italiana Archivio per le Scienze Mediche.* 2014. 173:163-170 |
| **R. G. McMurray, A. C. Hackney, V. L. Katz, M. Gall and W. J. Watson.** Pregnancy-induced changes in the maximal physiological-responses during swimming. *J.Appl.Physiol.* 1991. 71:1454-1459 |
| **R. G. McMurray, A. C. Hackney, W. K. Guion and V. L. Katz.** Metabolic and hormonal responses to low-impact aerobic dance during pregnancy. *Medicine & Science in Sports & Exercise.* 1996. 28:41-46 |
| **R. G. McMurray, M. J. Berry and V. Katz.** The beta-endorphin responses of pregnant women during aerobic exercise in the water. / Les reponses des beta-endorphines des femmes enceintes lors d ' un exercice aerobie dans l ' eau. *Medicine & Science in Sports & Exercise.* 1990. 22:298-303 |
| **R. G. McMurray, M. J. Berry and V. Katz.** The beta-endorphin responses of pregnant women during aerobic exercise in the water. 1990. 22:298-303 |
| **R. G. McMurray, M. J. Berry, V. L. Katz, D. G. Graetzer and R. C. Cefalo.** The thermoregulation of pregnant women during aerobic exercise in the water: a longitudinal approach. 1990. 61:119-123 |
| **R. G. McMurray, V. L. Katz, M. J. Berry and R. C. Cefalo.** Cardiovascular-responses of pregnant-women during aerobic exercise in water - a longitudinal-studY. *Int.J.Sports Med.* 1988. 9:443-447 |
| **R. G. McMurray, V. L. Katz, M. J. Berry and R. C. Cefalo.** The effect of pregnancy on metabolic responses during rest, immersion, and aerobic exercise in the water. 1988. 158:481-486 |
| **R. G. McMurray, V. L. Katz, W. E. Meyer-Goodwin and R. C. Cefalo.** Thermoregulation of pregnant women during aerobic exercise on land and in the water. 1993. 10:178-182 |
| **R. G. McMurray, V. W. Brabham and A. C. Hackney.** Catecholamine responses in pregnant women: Comparisons between low-impact aerobic dance and treadmill walking. 1998. 15:25-32 |
| **R. H. Dressendorfer and R. C. Goodlin.** Fetal heart rate response to maternal exercise testing. *Physician Sportsmed.* 1980. 8:90-96 |
| **R. Helseth, O. Salvesen, S. N. Stafne, S. Morkved, K. A. Salvesen and S. M. Carlsen.** Gestational diabetes mellitus among Nordic Caucasian women: prevalence and risk factors according to WHO and simplified IADPSG criteria. 2014. 74:620-628 |
| **R. Iqbal, G. Rafique, S. Badruddin, R. Qureshi, R. Cue and K. Gray-Donald.** Increased body fat percentage and physical inactivity are independent predictors of gestational diabetes mellitus in South Asian women. *Eur.J.Clin.Nutr.* 2007. 61:736-742 |
| **R. J. Bell, S. M. Palma and J. M. Lumley.** The effect of vigorous exercise during pregnancy on birth-weight. *Aust.N.Z.J.Obstet.Gynaecol.* 1995. 35:46-51 |
| **R. J. Morrow, J. W. Ritchie and S. B. Bull.** Fetal and maternal hemodynamic responses to exercise in pregnancy assessed by Doppler ultrasonography. *American Journal of Obstetrics & Gynecology.* 1989. 160:138-140 |
| **R. Jago, T. Baranowski, K. Watson, J. C. Baranowski, T. Nicklas and I. F. Zakeri.** Relationships between maternal and child cardiovascular risk factors: ethnic differences and lack of influence of physical activity. *Arch.Pediatr.Adolesc.Med.* 2004. 158:1125-1131 |
| **R. Jayashree, A. Malini, A. Rakhshani, H. Nagendra, S. Gunasheela and R. Nagarathna.** PMC3573541; Effect of the integrated approach of yoga therapy on platelet count and uric acid in pregnancy: A multicenter stratified randomized single-blind study. *International Journal of Yoga.* 2013. 6:39-46 |
| **R. Kordi, M. Abolhasani, M. Rostami, S. Hantoushzadeh, M. A. Mansournia and F. Vasheghani-Farahani.** Comparison between the effect of lumbopelvic belt and home based pelvic stabilizing exercise on pregnant women with pelvic girdle pain; a randomized controlled trial. 2013. 26:133-139 |
| **R. L. Jones, J. J. Botti, W. M. Anderson and N. L. Bennett.** Thermoregulation during aerobic exercise in pregnancy. *Obstetrics & Gynecology.* 1985. 65:340-345 |
| **R. L. Polis, D. Gussman and Y. H. Kuo.** Yoga in Pregnancy: An Examination of Maternal and Fetal Responses to 26 Yoga Postures. *Obstetrics & Gynecology.* 2015. 126:1237-1241 |
| **R. M. Grivell, L. N. Yelland, A. Deussen, C. A. Crowther and J. M. Dodd.** NIHMS729982 Available on 01/01/17] PMC4742332 Available on 01/01/17]; Antenatal dietary and lifestyle advice for women who are overweight or obese and the effect on fetal growth and adiposity: the LIMIT randomised trial. *BJOG: An International Journal of Obstetrics & Gynaecology.* 2016. 123:233-243 |
| **R. M. Jeffreys, W. Stepanchak, B. Lopez, J. Hardis and J. F. Clapp 3.** Uterine blood flow during supine rest and exercise after 28 weeks of gestation. *BJOG: An International Journal of Obstetrics & Gynaecology.* 2006. 113:1239-1247 |
| **R. M. Lewis, S. L. Greenwood, J. K. Cleal, et al.** Maternal muscle mass may influence system A activity in human placenta. *Placenta.* 2010. 31:418-422 |
| **R. M. Luoto, T. I. Kinnunen, M. Aittasalo, et al.** PMC2923097; Prevention of gestational diabetes: design of a cluster-randomized controlled trial and one-year follow-up. *BMC Pregnancy & Childbirth.* 2010. 10:39 |
| **R. McMurray, A. Hackney, V. Katz, M. Gall and W. Watson.** Pregnancy induced changes in the maximal physiological responses during swimming (Modifications des reponses physiologiques maximales du fait d'une grossesse pendant un exercice de natation). 1991. 71:1454-1459 |
| **R. Polman, M. Kaiseler and E. Borkoles.** Effect of a single bout of exercise on the mood of pregnant women. *Journal of Sports Medicine & Physical Fitness.* 2007. 47:103-111 |
| **R. R. Scholten, D. J. Thijssen, F. K. Lotgering, M. T. Hopman and M. E. Spaanderman.** Cardiovascular effects of aerobic exercise training in formerly preeclamptic women and healthy parous control subjects. *American Journal of Obstetrics & Gynecology.* 2014. 211:516.e1-516.e11 |
| **R. Ram**. Effect of exercise training on enos expression, NO production and oxygen metabolism in human placenta. 2013. 8: |
| **R. Ram**. Influence of regular aerobic exercise on endothelium-dependent vasodilation and cardiorespiratory fitness in pregnant women. 2011. 37:1601-1608 |
| **R. Ram**. The effect of aerobic exercise on oxygen consumption in healthy first-pregnancy females: A randomized clinical trial. 2011. 62:15-23 |
| **R. Ramirez-Velez, Aguilar De Plata, M. Mosquera and B. Salazar.** Influence of regular aerobic exercise on endothelium-dependent vasodilation and cardio-respiratory fitness in pregnant women. *Physiotherapy (United Kingdom).* 2011. 97:eS1033 |
| **R. Ramirez-Velez, M. Mosquera, J. G. Ortega, et al.** Aerobic physical exercise increases endothelium-dependent vasodilation and oxygen consumption in healthy primigravida. Controlled randomized clinical trial. NCT00741312. Spanish]. *Revista Colombiana de Cardiologia.* 2010. 17: |
| **R. Ramirez-Velez, M. Romero, I. Echeverri, et al.** PMC3059275; A factorial randomized controlled trial to evaluate the effect of micronutrients supplementation and regular aerobic exercise on maternal endothelium-dependent vasodilatation and oxidative stress of the newborn. *Trials Electronic Resource].* 2011. 12:60 |
| **R. Ramirez-Velez.** Effect of exercise training on eNOS expression, no production and oxygen metabolism in human placenta. *Obesity Reviews.* 2014. 15:201 |
| **R. Retnakaran, Y. Qi, M. Sermer, P. W. Connelly, B. Zinman and A. J. Hanley.** CAMS825 PMC2878329; Pre-gravid physical activity and reduced risk of glucose intolerance in pregnancy: the role of insulin sensitivity. *Clin.Endocrinol.(Oxf).* 2009. 70:615-622 |
| **R. Siva Priya, V. Kokila, K. Kanchana Malai and S. Suresh Kumar.** Effectiveness of Antenatal Motor Relearning Approach of Diaphragm, Deep Abdominal and Pelvic Floor Muscles Versus Kegels Exercises on Postpartum Pelvic Floor Muscle Strength. 2014. 8:193-197 5 |
| **R. U. Erkkola, J. P. Pirhonen and A. K. Kivijarvi.** Flow velocity waveforms in uterine and umbilical arteries during submaximal bicycle exercise in normal pregnancy. *Obstetrics & Gynecology.* 1992. 79:611-615 |
| **R. W. Leung, J. F. Li, M. K. Leung, et al.** Efficacy of birth ball exercises on labour pain management. 2013. 19:393-399 |
| **R. Walji, S. Atkinson and O. Wahoush.** P05.65. BHIP - be healthy in pregnancy: strategies nutritional and physical activity interventions to improve gestational weight gain management. *BMC Complementary & Alternative Medicine.* 2012. 12:1-1 1p |
| **Ramin Kordi, Maryam Abolhasani, Mohsen Rostami, Sedigheh Hantoushzadeh, Mohammad Ali Mansournia and Farzaneh Vasheghani-Farahani.** Comparison between the effect of lumbopelvic belt and home based pelvic stabilizing exercise on pregnant women with pelvic girdle pain; a randomized controlled trial. *Journal of Back & Musculoskeletal Rehabilitation.* 2013. 26:133-139 |
| **Ravi Retnakaran, Qi Ying, Mathew Sermer, Philip W. Connelly, Bernard Zinman and Anthony J. Hanley.** Gestational Diabetes and Postpartum Physical Activity: Evidence of Lifestyle Change 1 Year After Delivery. 2010. 18:1323-1329 |
| **Ruben Barakat Carballo, James Robert Stirling, Maria Zakynthinaki and Alejandro Lucia Mulas.** Acute maternal exercise during the third trimester of pregnancy, influence on foetal heart rate. *RICYDE Revista internacional de Ciencias del Deporte / The International Journal of Sport Science.* 2008. 4:33-43 |
| **Ruben Barakat Carballo, Yaiza Cordero Rodr**. Actividad f. *RICYDE.Revista Internacional de Ciencias del Deporte.* 2010. 6:205-217 |
| **Ruth York, Linda P. Brown, Cynthia Armstrong Persily and Barbara S. Jacobsen.** Affect in diabetic women during pregnancy and postpartum. 1996. 45:54-56 |
| **S. A. Charlesworth, L. A. Wolfe and G. A. Davies.** Physicochemical analysis of acid-base responses to prolonged moderate exercise in late gestation. *Applied Physiology, Nutrition, & Metabolism = Physiologie Appliquee, Nutrition et Metabolisme.* 2006. 31:744-752 |
| **S. A. Hopkins, J. C. Baldi, W. S. Cutfield, L. McCowan and P. L. Hofman.** Effects of exercise training on maternal hormonal changes in pregnancy. *Clin.Endocrinol.(Oxf).* 2011. 74:495-500 |
| **S. A. Hopkins, J. C. Baldi, W. S. Cutfield, L. McCowan and P. L. Hofman.** Exercise training in pregnancy reduces offspring size without changes in maternal insulin sensitivity. *Journal of Clinical Endocrinology & Metabolism.* 2010. 95:2080-2088 |
| **S. A. Smith and Y. Michel.** A pilot study on the effects of aquatic exercises on discomforts of pregnancy. 2006. 35:315-323 |
| **S. A. Vella, C. A. Magee and D. P. Cliff.** Trajectories and Predictors of Health-Related Quality of Life during Childhood. 2015. 167:422-427 |
| **S. A. Wilkinson and H. D. McIntyre.** Evaluation of the 'healthy start to pregnancy' early antenatal health promotion workshop: a randomized controlled trial. 2012. 12:131 |
| **S. A. Wilkinson, Y. D. Miller and B. Watson.** Prevalence of health behaviours in pregnancy at service entry in a Queensland health service district. *Australian & New Zealand Journal of Public Health.* 2009. 33:228-233 |
| **S. A. Wilkinson, Y. D. Miller and B. Watson.** The effects of a woman-focused, woman-held resource on preventive health behaviors during pregnancy: the pregnancy pocketbook. *Women Health.* 2010. 50:342-358 |
| **S. Abbasi, M. Moazami, N. Bijeh and S. R. Mirmajidi.** Investigation of the relationship between physical activity levels, maternal weight (Before delivery) and serum cortisol level (during labor) in Nulliparous women. *Iranian Journal of Obstetrics, Gynecology and Infertility.* 2015. 18:12-19 |
| **S. Abraham, A. Taylor and J. Conti.** Postnatal depression, eating, exercise, and vomiting before and during pregnancy. 2001. 29:482-487 |
| **S. B. Gesell, J. A. Katula, C. Strickland and M. Z. Vitolins.** PMC4500842; Feasibility and Initial Efficacy Evaluation of a Community-Based Cognitive-Behavioral Lifestyle Intervention to Prevent Excessive Weight Gain During Pregnancy in Latina Women. *Maternal & Child Health Journal.* 2015. 19:1842-1852 |
| **S. B. Petersen, M. Strom, E. Maslova, et al.** Predicted Vitamin D status during pregnancy in relation to offspring forearm fractures in childhood: A study from the Danish National Birth Cohort. *Br.J.Nutr.* 2015. 114:1900-1908 |
| **S. Babbar and S. P. Chauhan.** Exercise and yoga during pregnancy: a survey. 2015. 28:431-435 |
| **S. Berntsen, K. R. Richardsen, K. Morkrid, L. Sletner, K. I. Birkeland and A. K. Jenum.** Objectively recorded physical activity in early pregnancy: a multiethnic population-based study. 2014. 24:594-601 |
| **S. Bershadsky, L. Trumpfheller, H. B. Kimble, D. Pipaloff and I. S. Yim.** The effect of prenatal Hatha yoga on affect, cortisol and depressive symptoms. 2014. 20:106-113 |
| **S. Bo, G. Menato, A. Lezo, et al.** Dietary fat and gestational hyperglycaemia. 2001. 44:972-978 |
| **S. Botelho, J. Marques, L. Pereira, et al.** Can the abdominal and pelvic muscle training trigger the co-activation between the transversus abdominis / internal oblique muscle and the muscles of the pelvic floor during pregnancy and postpartum?. *Neurourol.Urodyn.* 2011. 30 (6):957-958 |
| **S. C. Christiansen, E. Vanky, H. Klungland, et al.** The effect of exercise and metformin treatment on circulating free DNA in pregnancy. *Placenta.* 2014. 35:989-993 |
| **S. C. Dumith, M. R. Domingues, R. Mendoza-Sassi and J. A. Cesar.** Physical activity during pregnancy and its association with maternal and child health indicators. *Rev.Saude Publica.* 2012. 46:327-333 |
| **S. C. Wong and D. C. McKenzie.** Cardiorespiratory fitness during pregnancy and its effect on outcome. *Int.J.Sports Med.* 1987. 8:79-83 |
| **S. Chuntharapat, W. Petpichetchian and U. Hatthakit.** Yoga during pregnancy: effects on maternal comfort, labor pain and birth outcomes. *Complementary Therapies in Clinical Practice.* 2008. 14:105-115 |
| **S. Currie, M. Sinclair, D. S. Liddle, A. Nevill and M. H. Murphy.** PMC4684930; Application of objective physical activity measurement in an antenatal physical activity consultation intervention: a randomised controlled trial. *BMC Public Health.* 2015. 15:1259 |
| **S. D. Brown, S. F. Ehrlich, A. Kubo, et al.** Lifestyle behaviors and ethnic identity among diverse women at high risk for type 2 diabetes. *Social Science and Medicine.* 2016. 160:87-93 |
| **S. Degani, E. Abinader, I. Eibschitz, M. Oettinger, I. Shapiro and M. Sharf.** Isometric exercise test for predicting gestational hypertension. *Obstetrics & Gynecology.* 1985. 65:652-654 |
| **S. E. Badon, P. D. Wartko, C. F. Qiu, T. K. Sorensen, M. A. Williams and D. A. Enquobahrie.** Leisure Time Physical Activity and Gestational Diabetes Mellitus in the Omega Study. *Med.Sci.Sports Exerc.* 2016. 48:1044-1052 |
| **S. E. Badon, P. D. Wartko, C. Qiu, T. K. Sorensen, M. A. Williams and D. A. Enquobahrie.** NIHMS748475 Available on 06/01/17] PMC4868777 Available on 06/01/17]; Leisure Time Physical Activity and Gestational Diabetes Mellitus in the Omega Study. *Medicine & Science in Sports & Exercise.* 2016. 48:1044-1052 |
| **S. E. Badon, P. L. Wander, C. Qiu, R. S. Miller, M. A. Williams and D. A. Enquobahrie.** Maternal Leisure Time Physical Activity and Infant Birth Size. *Epidemiology.* 2016. 27:74-81 |
| **S. E. McAuley, D. Jensen, M. J. McGrath and L. A. Wolfe.** Effects of human pregnancy and aerobic conditioning on alveolar gas exchange during exercise. 2005. 83:625-633 |
| **S. Esmaelzadeh Saeyeh, S. Taavoni, Z. Ahmadi and H. Haghani.** Trend of exercise and believes about it in women's that referred to health center of Iran university. 2010. 4:4468-4472 |
| **S. F. Ehrlich, B. Sternfeld, A. E. Krefman, et al.** Moderate and Vigorous Intensity Exercise During Pregnancy and Gestational Weight Gain in Women with Gestational Diabetes. *Maternal & Child Health Journal.* 2016. 20:1247-1257 |
| **S. Ferland, E. Bujold, Y. Giguere, M. Girard, S. Demers and J. C. Forest.** Association between physical activity in early pregnancy and markers of placental growth and function. *Journal of Obstetrics & Gynaecology Canada: JOGC.* 2013. 35:787-792 |
| **S. Forouhari, Z. Yazdanpanahi, M. E. Parsanezhan and M. Raigan-Shirazi.** The effects of regular exercise on pregnancy outcome. *Iranian Red Crescent Medical Journal.* 2009. 11:57-60 |
| **S. Guendelman, M. Pearl, J. L. Kosa, S. Graham, B. Abrams and M. Kharrazi.** Association between preterm delivery and pre-pregnancy body mass (BMI), exercise and sleep during pregnancy among working women in Southern California. *Maternal & Child Health Journal.* 2013. 17:723-731 |
| **S. Halvorsen, L. A. Haakstad, E. Edvardsen and K. Bo.** Effect of aerobic dance on cardiorespiratory fitness in pregnant women: a randomised controlled trial. 2013. 99:42-48 |
| **S. Han, P. F. Middleton, T. S. Tran and C. A. Crowther.** Assessing use of a printed lifestyle intervention tool by women with borderline gestational diabetes and their achievement of diet and exercise goals: A descriptive study. *BMC Pregnancy and Childbirth.* 2016. 16 (1) (no pagination): |
| **S. Hartmann and R. Huch.** Response of pregnancy leg edema to a single immersion exercise session. *Acta Obstet.Gynecol.Scand.* 2005. 84:1150-1153 |
| **S. Hoirisch-Clapauch and M. A. S. Porto.** Early neonatal hypoglycemia prediction according to maternal parameters. *Thromb.Res.* 2013. 131:S96 |
| **S. Hoirisch-Clapauch and P. Benchimol-Barbosa.** Markers of insulin resistance and sedentary lifestyle are predictors of preeclampsia in women with adverse obstetric results. *Brazilian Journal of Medical & Biological Research.* 2011. 44:1285-1290 |
| **S. Hoirisch-Clapauch and P. R. Benchimol-Barbosa.** Markers of insulin resistance and sedentary lifestyle are predictors of preeclampsia in women with adverse obstetric results. 2011. 44:1285-1290 |
| **S. J. de Jersey, J. M. Nicholson, L. K. Callaway and L. A. Daniels.** An observational study of nutrition and physical activity behaviours, knowledge, and advice in pregnancy. *Bmc Pregnancy and Childbirth.* 2013. 13: |
| **S. J. Herring, D. B. Nelson, A. Davey, et al.** Determinants of excessive gestational weight gain in urban, low-income women. 2012. 22:e439-46 |
| **S. J. Herring, D. B. Nelson, A. Davey, et al.** NIHMS381717 PMC3433591; Determinants of excessive gestational weight gain in urban, low-income women. *Womens Health Issues.* 2012. 22:e439-46 |
| **S. J. Herring, J. F. Cruice, G. G. Bennett, M. Z. Rose, A. Davey and G. D. Foster.** Preventing excessive gestational weight gain among African American women: A randomized clinical trial. *Obesity (Silver Spring, Md.).* 2016. 24:30-36 |
| **S. Jaque-Fortunato, R. A. Wiswell, N. Khodiguian and R. Artal.** A comparison of the ventilatory responses to exercise in pregnant, postpartum, and nonpregnant women. *Semin.Perinatol.* 1996. 20:263-276 |
| **S. K. Field, S. G. Bell, D. F. Cenaiko and W. A. Whitelaw.** Relationship between inspiratory effort and breathlessness in pregnancy. 1991. 71:1897-1902 |
| **S. K. Ng, C. M. Cameron, A. P. Hills, R. J. McClure and P. A. Scuffham.** PMC4165994; Socioeconomic disparities in prepregnancy BMI and impact on maternal and neonatal outcomes and postpartum weight retention: the EFHL longitudinal birth cohort study. *BMC Pregnancy & Childbirth.* 2014. 14:314 |
| **S. Kocaoz, K. Eroglu and A. A. Sivaslioglu.** Role of pelvic floor muscle exercises in the prevention of stress urinary incontinence during pregnancy and the postpartum period. 2013. 75:34-40 |
| **S. Krogsgaard, S. L. Gudmundsdottir and T. I. Nilsen.** PMC3569934; Prepregnancy physical activity in relation to offspring birth weight: a prospective population-based study in Norway-The HUNT Study. *Journal of Pregnancy.* 2013. 2013:780180 |
| **S. Krogsgaard, S. L. Gudmundsdottir and T. I. Nilsen.** Prepregnancy physical activity in relation to offspring birth weight: a prospective population-based study in Norway-The HUNT Study. 2013. 2013:780180 |
| **S. Kuhle, A. C. Allen and P. J. Veugelers.** Prevention potential of risk factors for childhood overweight. 2010. 101:365-368 |
| **S. L. Carmichael, G. M. Shaw, E. Neri, D. M. Schaffer and S. Selvin.** Physical activity and risk of neural tube defects. *Maternal & Child Health Journal.* 2002. 6:151-157 |
| **S. L. Duncan and J. Ginsburg.** Arteriolar distensibility in hypertensive pregnancy. 1968. 100:222-229 |
| **S. L. Nascimento, F. G. Surita, A. C. Godoy, K. T. Kasawara and S. S. Morais.** PMC4470997; Physical Activity Patterns and Factors Related to Exercise during Pregnancy: A Cross Sectional Study.Erratum appears in PLoS One. 2015;10(7):e0133564; PMID: 26176665]. *PLoS ONE Electronic Resource].* 2015. 10:e0128953 |
| **S. L. Nascimento, F. G. Surita, A. C. Godoy, K. T. Kasawara and S. S. Morais.** Physical activity patterns and factors related to exercise during pregnancy: A cross sectional study. *PLoS ONE.* 2015. 10 (6) (no pagination): |
| **S. L. Nascimento, F. G. Surita, A. C. Godoy, K. T. Kasawara and S. S. Morais.** PMC4503632; Correction: Physical Activity Patterns and Factors Related to Exercise during Pregnancy: A Cross Sectional Study.Erratum for PLoS One. 2015;10(6):e0128953; PMID: 26083416]. *PLoS ONE Electronic Resource].* 2015. 10:e0133564 |
| **S. L. Nascimento, F. G. Surita, M. A. Parpinelli, S. Siani and e. Silva Pinto.** The effect of an antenatal physical exercise programme on maternal/perinatal outcomes and quality of life in overweight and obese pregnant women: a randomised clinical trial. *BJOG: An International Journal of Obstetrics & Gynaecology.* 2011. 118:1455-1463 |
| **S. L. Redden, M. J. LaMonte, J. L. Freudenheim and C. B. Rudra.** The association between gestational diabetes mellitus and recreational physical activity. *Maternal & Child Health Journal.* 2011. 15:514-519 |
| **S. M. A. Donahue, F. J. Zimmerman, J. R. Starr and V. L. Holt.** Correlates of Pre-Pregnancy Physical Inactivity: Results from the Pregnancy Risk Assessment Monitoring System. *Matern.Child Health J.* 2010. 14:235-244 |
| **S. M. O. Kalayeh, R. Nikbakht and S. Seddigi.** The effect of exercise during pregnancy on mother's depression in Zahedan. *International Journal of Pharmacy and Technology.* 2016. 8:12248-12262 |
| **S. M. Ruchat, M. H. Davenport, I. Giroux, et al.** Nutrition and exercise reduce excessive weight gain in normal-weight pregnant women. *Medicine & Science in Sports & Exercise.* 2012. 44:1419-1426 |
| **S. M. Ruchat, M. H. Davenport, I. Giroux, et al.** Walking program of low or vigorous intensity during pregnancy confers an aerobic benefit. *Int.J.Sports Med.* 2012. 33:661-666 |
| **S. M. Wang, P. DeZinno, L. Fermo, et al.** Complementary and alternative medicine for low-back pain in pregnancy: a cross-sectional survey. 2005. 11:459-464 |
| **S. Macintyre, G. Watt, P. West and R. Ecob.** Correlates of blood pressure in 15 year olds in the West of Scotland. 1991. 45:143-147 |
| **S. Marcoux, J. Brisson and J. Fabia.** PMC1052817; The effect of leisure time physical activity on the risk of pre-eclampsia and gestational hypertension. *Journal of Epidemiology & Community Health.* 1989. 43:147-152 |
| **S. Marquez-Sterling, A. C. Perry, T. A. Kaplan, R. A. Halberstein and J. F. Signorile.** Physical and psychological changes with vigorous exercise in sedentary primigravidae. *Medicine & Science in Sports & Exercise.* 2000. 32:58-62 5p |
| **S. Million, K. M. Gustafson and L. E. May.** Effects of maternal exercise on fetal breathing and hiccups. *The FASEB Journal.* 2009. 23 (S1): |
| **S. Morino, Y. Kajiwara, M. Ishihara, et al.** The relationship between the daily step counts and low back pain during pregnancy. *Clinical & Experimental Obstetrics & Gynecology.* 2016. 43:192-197 |
| **S. Morkved, K. A. Salvesen, B. Schei, S. Lydersen and K. Bo.** Does group training during pregnancy prevent lumbopelvic pain? A randomized clinical trial. 2007. 86:276-282 |
| **S. Morkved, K. Bo, B. Schei and K. A. Salvesen.** Pelvic floor muscle training during pregnancy to prevent urinary incontinence: a single-blind randomized controlled trial. 2003. 101:313-319 |
| **S. Morkved, K. Bo, B. Schei, K. A. Salvesen and P. Chiarelli.** Pelvic floor muscle training during pregnancy prevented urinary incontinence in late pregnancy and after delivery. 2003. 5:130-131 |
| **S. N. Portela, R. Rocha-de-Souza, K. Oppermann-Lisboa, G. B. Donatto, S. N. Dal Bosco and P. El Beitune.** Maternal physical activity, cervical length and its relation to spontaneous vaginal birth at term. *Archives of Gynecology & Obstetrics.* 2014. 290:257-262 |
| **S. N. Seneviratne, G. K. Parry, L. M. McCowan, et al.** PMC4002538; Antenatal exercise in overweight and obese women and its effects on offspring and maternal health: design and rationale of the IMPROVE (Improving Maternal and Progeny Obesity Via Exercise) randomised controlled trial. *BMC Pregnancy & Childbirth.* 2014. 14:148 |
| **S. N. Seneviratne, Y. Jiang, J. Derraik, et al.** Effects of antenatal exercise in overweight and obese pregnant women on maternal and perinatal outcomes: a randomised controlled trial. *BJOG: An International Journal of Obstetrics & Gynaecology.* 2016. 123:588-597 |
| **S. N. Stafne, K. A. Salvesen and S. Morkved.** Does regular exercise in pregnancy prevent urinary incontinence?. *Physiotherapy (United Kingdom).* 2011. 97:eS1170-eS1171 |
| **S. N. Stafne, K. A. Salvesen, I. Volloyhaug and S. Morkved.** Does a regular exercise program including pelvic floor muscle exercises prevent urinary incontinence in pregnancy?. *Neurourol.Urodyn.* 2011. 30 (6):941-942 |
| **S. N. Stafne, K. A. Salvesen, P. R. Romundstad, B. Stuge and S. Morkved.** Does regular exercise during pregnancy influence lumbopelvic pain? A randomized controlled trial. *Acta Obstet.Gynecol.Scand.* 2012. 91:552-559 |
| **S. N. Stafne, K. A. Salvesen, P. R. Romundstad, I. H. Torjusen and S. Morkved.** Does regular exercise including pelvic floor muscle training prevent urinary and anal incontinence during pregnancy? A randomised controlled trial. 2012. 119:1270-1280 |
| **S. Narendran, R. Nagarathna, S. Gunasheela and H. R. Nagendra.** Efficacy of yoga in pregnant women with abnormal Doppler study of umbilical and uterine arteries. *J.Indian Med.Assoc.* 2005. 103:12-4, 16-7 |
| **S. Ogita, M. Imanaka, T. Takebayashi, et al.** Significance of exercise and bed rest in pregnancy--study on the lying postures of gravidas during sleep (2). 1990. 9:93-98 |
| **S. Onoyama, L. Qiu, H. P. Low, et al.** Prenatal Maternal Physical Activity and Stem Cells in Umbilical Cord Blood. *Medicine & Science in Sports & Exercise.* 2016. 48:82-89 |
| **S. Ozcan and V. Duyan.** Fetal health locus of control in a sample of pregnant Turkish women. 2015. 45:714-722 |
| **S. Ozdemir, H. Bebis, T. Ortabag and C. Acikel.** Evaluation of the efficacy of an exercise program for pregnant women with low back and pelvic pain: a prospective randomized controlled trial. 2015. 71:1926-1939 |
| **S. P. Mourtakos, K. D. Tambalis, D. B. Panagiotakos, et al.** Maternal lifestyle characteristics during pregnancy, and the risk of obesity in the offspring: A study of 5,125 children. *BMC Pregnancy and Childbirth.* 2015. 15: |
| **S. P. Sady, M. W. Carpenter, M. A. Sady, et al.** Prediction of VO2max during cycle exercise in pregnant women. *J.Appl.Physiol.* 1988. 65:657-661 |
| **S. P. Sady, M. W. Carpenter, P. D. Thompson, M. A. Sady, B. Haydon and D. R. Coustan.** CARDIOVASCULAR-RESPONSE TO CYCLE EXERCISE DURING AND AFTER PREGNANCY. *J.Appl.Physiol.* 1989. 66:336-341 |
| **S. P. Sady, M. W. Carpenter, P. D. Thompson, M. A. Sady, B. Haydon and D. R. Coustan.** Cardiovascular response to cycle exercise during and after pregnancy. 1989. 66:336-341 |
| **S. Phelan, M. G. Phipps, B. Abrams, et al.** Does behavioral intervention in pregnancy reduce postpartum weight retention? Twelve-month outcomes of the Fit for Delivery randomized trial. 2014. 99:302-311 |
| **S. Phelan, M. G. Phipps, B. Abrams, F. Darroch, A. Schaffner and R. R. Wing.** Randomized trial of a behavioral intervention to prevent excessive gestational weight gain: the Fit for Delivery Study. 2011. 93:772-779 |
| **S. Plachta-Danielzik, B. Kehden, B. Landsberg, et al.** Attributable risks for childhood overweight: evidence for limited effectiveness of prevention. 2012. 130:e865-71 |
| **S. R. Cavalcante, J. G. Cecatti, R. I. Pereira, E. P. Baciuk, A. L. Bernardo and C. Silveira.** PMC2628875; Water aerobics II: maternal body composition and perinatal outcomes after a program for low risk pregnant women. *Reproductive Health.* 2009. 6:1 |
| **S. R. Kulkarni, C. H. Fall, N. V. Joshi, et al.** Determinants of incident hyperglycemia 6 years after delivery in young rural Indian mothers: the Pune Maternal Nutrition Study (PMNS). 2007. 30:2542-2547 |
| **S. R. Sekulic, D. D. Lukac and N. M. Naumovic.** The fetus cannot exercise like an astronaut: gravity loading is necessary for the physiological development during second half of pregnancy. *Med.Hypotheses.* 2005. 64:221-228 |
| **S. R. Vega, J. Kleinert, M. Sulprizio, W. Hollmann, W. Bloch and H. K. Struder.** Responses of serum neurotrophic factors to exercise in pregnant and postpartum women. *Psychoneuroendocrinology.* 2011. 36:220-227 |
| **S. Rao, A. Kanade, B. M. Margetts, et al.** Maternal activity in relation to birth size in rural India. The Pune Maternal Nutrition Study. 2003. 57:531-542 |
| **S. Rao, A. N. Kanade, C. S. Yajnik and C. H. Fall.** PMC3408701 UKMS37966; Seasonality in maternal intake and activity influence offspring's birth size among rural Indian mothers--Pune Maternal Nutrition Study. *Int.J.Epidemiol.* 2009. 38:1094-1103 |
| **S. Rodrigues, E. J. Robinson, H. Ghezzo and K. Gray-Donald.** Interaction of body weight and ethnicity on risk of gestational diabetes mellitus. 1999. 70:1083-1089 7 |
| **S. S. Stutzman, C. A. Brown, S. M. Hains, et al.** The effects of exercise conditioning in normal and overweight pregnant women on blood pressure and heart rate variability. *Biol.Res.Nurs.* 2010. 12:137-148 |
| **S. Sadr, N. Pourkiani-Allah-Abad and K. J. Stuber.** The treatment experience of patients with low back pain during pregnancy and their chiropractors: a qualitative study. 2012. 20: |
| **S. Saeedi.** Effect of exercise program on symptoms of postpartum depression. *Iranian Journal of Obstetrics, Gynecology and Infertility.* 2013. 15:26-31 |
| **S. Sankaralingam, Y. Jiang, S. T. Davidge and S. Yeo.** Effect of exercise on vascular superoxide dismutase expression in high-risk pregnancy. 2011. 28:803-810 |
| **S. Sealy-Jefferson, K. Hegner and D. P. Misra.** Linking nontraditional physical activity and preterm delivery in urban African-American women. *Womens Health Issues.* 2014. 24:e389-95 |
| **S. Seneviratne, G. Parry, Y. Jiang, et al.** A randomized controlled trial on the effects of antenatal exercise on birth weight and neonatal body composition. *International Journal of Pediatric Endocrinology.Conference: 8th Biennial Scientific Meeting of the Asia Pacific Paediatric Endocrine Society, APPES.* 2014. |
| **S. T. Brophy.** Physical activity and excess weight in pregnancy have independent and unique effects on delivery and perinatal outcomes. *PloS one.* 2014. 9:e94532 |
| **S. T. Harris, J. Liu, S. Wilcox, R. Moran and A. Gallagher.** Exercise during pregnancy and its association with gestational weight gain. 2015. 19:528-537 |
| **S. T. Harris, J. Liu, S. Wilcox, R. Moran and A. Gallagher.** Physical activity during pregnancy and its association with gestational weight gain among south carolina mothers. *Am.J.Epidemiol.* 2012. 175:S22 |
| **S. T. Orr, S. A. James, J. Garry and E. Newton.** Exercise participation before and during pregnancy among low-income, urban, Black women: the Baltimore Preterm Birth Study. *Ethn.Dis.* 2006. 16:909-913 |
| **S. T. Orr, S. A. James, J. Garry, C. B. Prince and E. R. Newton.** Exercise and pregnancy outcome among urban, low-income, black women. *Ethn.Dis.* 2006. 16:933-937 |
| **S. Tavares Jde, A. S. Melo, M. M. Amorim, et al.** Association between maternal physical activity, gestational weight gain and birth weight in a cohort of 118 pregnant women in Campina Grande, Northeast of Brazil]. *Rev.Assoc.Med.Bras.* 2009. 55:335-341 |
| **S. V. Jaque-Fortunato, R. A. Wiswell, N. Khodiguian and R. Artal.** A comparison of the ventilatory responses to exercise in pregnant, postpartum, and nonpregnant women. 1996. 20:263-276 |
| **S. W. Groth and D. Morrison-Beedy.** Low-income, pregnant, African American women's views on physical activity and diet. 2013. 58:195-202 |
| **S. Yeo, J. Cisewski, E. F. Lock and J. S. Marron.** Exploratory analysis of exercise adherence patterns with sedentary pregnant women. 2010. 59:280-287 |
| **S. Yeo, N. M. Steele, M. C. Chang, S. M. Leclaire, D. L. Ronis and R. Hayashi.** Effect of exercise on blood pressure in pregnant women with a high risk of gestational hypertensive disorders.Erratum appears in J Reprod Med 2000 Jul;45(7):607]. *J.Reprod.Med.* 2000. 45:293-298 |
| **S. Yeo, N. M. Steele, M. Chang, S. M. Leclaire, D. L. Ronis and R. Hayashi.** Effect of exercise on blood pressure in pregnant women with a high risk of gestational hypertensive disorders [corrected] [published erratum appears in J REPROD MED Jul; 45(7): 607]. 2000. 45:293-298 6 |
| **S. Yeo, S. Davidge, D. L. Ronis, C. L. Antonakos, R. Hayashi and S. O'Leary.** A comparison of walking versus stretching exercises to reduce the incidence of preeclampsia: a randomized clinical trial. *Hypertension in Pregnancy.* 2008. 27:113-130 |
| **S. Yeo.** A randomized comparative trial of the efficacy and safety of exercise during pregnancy: design and methods. *Contemporary Clinical Trials.* 2006. 27:531-540 |
| **S. Yeo.** Adherence to walking or stretching, and risk of preeclampsia in sedentary pregnant women. *Res.Nurs.Health.* 2009. 32:379-390 12p |
| **S. Yeo.** NIHMS215096 PMC2904621; Prenatal stretching exercise and autonomic responses: preliminary data and a model for reducing preeclampsia. *Journal of Nursing Scholarship.* 2010. 42:113-121 |
| **S. Yeo.** Prenatal stretching exercise and autonomic responses: preliminary data and a model for reducing preeclampsia. 2010. 42:113-121 |
| **S. Youngwanichsetha, S. Phumdoung and T. Ingkathawornwong.** The effects of tai chi qigong exercise on plasma glucose levels and health status of postpartum Thai women with type 2 diabetes. *Focus on Alternative and Complementary Therapies.* 2013. 18:182-187 |
| **Sapna S. Gupta.** The efficacy of Treatment Program Focusing on Specific Stabilizing Exercises in Antenatal Period for Treatment of Pregnancy Related to Low Back and Pelvic Girdle Pain: A Randomized Controlled Trial. 2014. 8:267-271 5 |
| **Savitha Pramilda Cutinho, Raj Gopal and Rani G. Shoba .** Effect of Antenatal Yoga on Postnatal Depressive Symptoms among the Primipara Women of a Selected Hospital. *International Journal of Nursing Education.* 2016. 8:182-184 |
| **SeonAe Yeo and Jeongok G. Logan.** "Preventing obesity: Exercise and daily activities of low-income pregnant women": Erratum. *J.Perinat.Neonatal Nurs.* 2014. 28:156 |
| **SeonAe Yeo and Jeongok G. Logan.** Preventing obesity: Exercise and daily activities of low-income pregnant women. *J.Perinat.Neonatal Nurs.* 2014. 28:17-25 |
| **Sharon J. Herring, Janet W. Rich-Edwards, Emily Oken, Sheryl L. Rifas-Shiman, Ken P. Kleinman and Matthew W. Gillman.** Association of Postpartum Depression With Weight Retention 1 Year After Childbirth. 2008. 16:1296-1301 |
| **Stefan Kuhle, Alexander C. Allen and Paul J. Veugelers.** Perinatal and childhood risk factors for overweight in a provincial sample of Canadian grade 5 students. 2010. 5:88-96 |
| **Susan J. De Jersey, Lynda J. Ross, Kellie Himstedt, H. David McIntyre and Leonie K. Callaway.** Weight gain and nutritional intake in obese pregnant women: Some clues for intervention. 2011. 68:53-59 |
| **Susanne Winkel, Franziska Einsle, Lars Pieper, Michael Hofler, Hans-Ulrich Wittchen and Julia Martini.** Associations of anxiety disorders, depressive disorders and body weight with hypertension during pregnancy. 2015. 18:473-483 |
| **Suzanne Phelan, Maureen G. Phipps, Barbara Abrams, Francine Darroch, Andrew Schaffner and Rena R. Wing.** Randomized trial of a behavioral intervention to prevent excessive gestational weight gain: the Fit for Delivery Study. *Am.J.Clin.Nutr.* 2011. 93:772-779 8p |
| **T. Araki, R. Elias, Z. Rosenwaks and L. Poretsky.** Achieving a successful pregnancy in women with polycystic ovary syndrome. 2011. 40:865-894 |
| **T. B. Henriksen, M. Hedegaard and N. J. Secher.** Standing and walking at work and birthweight. *Acta Obstet.Gynecol.Scand.* 1995. 74:509-516 |
| **T. B. Henriksen, M. Hedegaard, N. J. Secher and A. J. Wilcox.** Obstetrics. Standing at work and preterm delivery. *British Journal of Obstetrics & Gynaecology.* 1995. 102:198-206 9p |
| **T. B. Henriksen, M. Hedegaard, N. J. Secher and A. J. Wilcox.** Standing at work and preterm delivery. *British Journal of Obstetrics & Gynaecology.* 1995. 102:198-206 |
| **T. C. Tan, S. P. Donnan and A. M. Chang.** Employment, physical overactivity and adverse pregnancy outcomes--applicability of AMA guidelines in Chinese women. 1988. 2:22-27 |
| **T. D. Dye, K. L. Knox, R. Artal, R. H. Aubry and M. A. Wojtowycz.** Physical activity, obesity, and diabetes in pregnancy. *Am.J.Epidemiol.* 1997. 146:961-965 |
| **T. Field, M. Diego, J. Delgado and L. Medina.** NIHMS424432 PMC3730281; Tai chi/yoga reduces prenatal depression, anxiety and sleep disturbances. *Complementary Therapies in Clinical Practice.* 2013. 19:6-10 |
| **T. Field, M. Diego, J. Delgado and L. Medina.** Tai chi/yoga reduces prenatal depression, anxiety and sleep disturbances. 2013. 19:6-10 |
| **T. Field, M. Diego, J. Delgado and L. Medina.** Yoga and social support reduce prenatal depression, anxiety and cortisol. *J.Bodywork Movement Ther.* 2013. 17:397-403 |
| **T. Field, M. Diego, M. Hernandez-Reif, L. Medina, J. Delgado and A. Hernandez.** NIHMS326920 PMC3319349; Yoga and massage therapy reduce prenatal depression and prematurity. *Journal of Bodywork & Movement Therapies.* 2012. 16:204-209 |
| **T. Fukushima, E. H. Hon and J. M. Park.** A maternal walking test for the evaluation of fetal well-being. *Journal of Maternal-Fetal and Neonatal Medicine.* 1993. 2:38-44 |
| **T. Fukushima, E. H. Hon and Park Jung Mok.** A maternal walking test for the evaluation of fetal well-being. 1993. 2:38-44 |
| **T. Haines and B. Stringer.** Physical exertion at work during pregnancy did not increase risk of preterm delivery or fetal growth restriction. *Evidence Based Nursing.* 2006. 9:121-121 1p |
| **T. I. Kinnunen, C. McParlin, P. Tennant, S. Robson, L. Poston and R. Bell.** Physical activity in overweight and obese pregnant women assessed by two objective methods. *Obesity Reviews.* 2010. 11:386-387 |
| **T. I. Kinnunen, J. Raitanen, M. Aittasalo and R. Luoto.** Preventing excessive gestational weight gain--a secondary analysis of a cluster-randomised controlled trial. 2012. 66:1344-1350 |
| **T. I. Kinnunen, M. Aittasalo, P. Koponen, et al.** Feasibility of a controlled trial aiming to prevent excessive pregnancy-related weight gain in primary health care. *BMC Pregnancy and Childbirth.* 2008. 8: |
| **T. I. Kinnunen, M. Pasanen, M. Aittasalo, et al.** Preventing excessive weight gain during pregnancy - a controlled trial in primary health care. *Eur.J.Clin.Nutr.* 2007. 61:884-891 |
| **T. J. Bungum, D. L. Peaslee, A. W. Jackson and M. A. Perez.** Exercise during pregnancy and type of delivery in nulliparae. 2000. 29:258-264 |
| **T. J. Hassan, K. Ibrahim, Sadiqua and S. N. Jabarey.** Excessive physical work during pregnancy and birth weight. *Asia-Oceania Journal of Obstetrics & Gynaecology.* 1990. 16:17-20 |
| **T. K. Sorensen, M. A. Williams, I. M. Lee, E. E. Dashow, M. L. Thompson and D. A. Luthy.** Recreational physical activity during pregnancy and risk of preeclampsia. 2003. 41:1273-1280 |
| **T. Kent, J. Gregor, L. Deardorff and V. Katz.** Edema of pregnancy: a comparison of water aerobics and static immersion. 1999. 94:726-729 |
| **T. L. Black, K. Raine and N. D. Willows.** Understanding prenatal weight gain in First Nations women. 2008. 32:198-205 8 |
| **T. L. Clissold, W. G. Hopkins and R. J. Seddon.** Lifestyle behaviours during pregnancy. *N.Z.Med.J.* 1991. 104:111-112 |
| **T. L. Crume, L. Ogden, N. A. West, et al.** NIHMS255232 PMC3027214; Association of exposure to diabetes in utero with adiposity and fat distribution in a multiethnic population of youth: the Exploring Perinatal Outcomes among Children (EPOCH) Study. *Diabetologia.* 2011. 54:87-92 |
| **T. L. Weissgerber, G. A. Davies and J. M. Roberts.** Modification of angiogenic factors by regular and acute exercise during pregnancy. *J.Appl.Physiol.* 2010. 108:1217-1223 |
| **T. L. Weissgerber, G. A. L. Davies and J. M. Roberts.** Regular exercise is associated with increased PlGF and reduced sFlt-1 and seng in pregnancy. *Reproductive Sciences.* 2010. 1):153A-154A |
| **T. L. Weissgerber, G. A. L. Davies and M. E. Tschakovsky.** Brachial artery flow-mediated dilation is not affected by pregnancy or regular exercise participation. *Clin.Sci.* 2011. 121:355-365 |
| **T. L. Weissgerber, L. A. Wolfe, W. G. Hopkins and G. A. Davies.** Serial respiratory adaptations and an alternate hypothesis of respiratory control in human pregnancy. *Respiratory Physiology & Neurobiology.* 2006. 153:39-53 |
| **T. Mustila, J. Raitanen, P. Keskinen, A. Saari and R. Luoto.** PMC3403888; Lifestyle counseling during pregnancy and offspring weight development until four years of age: follow-up study of a controlled trial. *Journal of Negative Results in Biomedicine.* 2012. 11:11 |
| **T. Nurminen, S. Lusa, J. Ilmarinen and K. Kurppa.** Physical work load, fetal development and course of pregnancy. *Scand.J.Work Environ.Health.* 1989. 15:404-414 |
| **T. Nurminen, S. Lusa, J. Ilmarinen and K. Kurppa.** Physical work load, fetal development and course of pregnancy. 1989. 15:404-414 |
| **T. R. Cohen and K. G. Koski.** Limiting excess weight gain in healthy pregnant women: importance of energy intakes, physical activity, and adherence to gestational weight gain guidelines. 2013. 2013:787032 |
| **T. R. Cohen, H. Plourde and K. G. Koski.** Are Canadian women achieving a fit pregnancy? A pilot study. 2010. 101:87-91 |
| **T. Shirazian, S. Monteith, F. Friedman and A. Rebarber.** Lifestyle modification program decreases pregnancy weight gain in obese women. *Am.J.Perinatol.* 2010. 27:411-414 |
| **T. Svoboda, A. Wagner, P. Speiser, M. Clodi and A. Luger.** Epidermal growth factor plasma concentrations in healthy control persons, acute and chronic stress and during pregnancy. *Hormone & Metabolic Research.* 1992. 24:582-584 |
| **T. V. Bertagnolli, M. S. Machado, J. S. Machado, C. H. Ferreira, G. Duarte and R. C. Cavalli.** Influence of a physiotherapy protocol in maternal and fetal hemodynamics in pregnant women with preeclampsia. *Pregnancy hypertension.* 2014. 5:79 |
| **Tara Denise Young.** Gestational diabetes, type 2 diabetes risk and ethnicity: A qualitative and quantitative analysis. *Dissertation Abstracts International: Section B: The Sciences and Engineering.* 2009. 69:5329 |
| **Tiffany A. Moore Simas, Silvia Corvera, Mary M. Lee, et al.** Understanding multifactorial influences on the continuum of maternal weight trajectories in pregnancy and early postpartum: study protocol, and participant baseline characteristics. *BMC Pregnancy & Childbirth.* 2015. 15:71-71 |
| **Todd Hagobian, Alyssa D'Amico, Camille Vranna, Anna Brannen and Suzanne Phelan.** Prospective Changes in Energy Intake, Physical Activity, and Resting Energy Expenditure during Pregnancy. *Californian Journal of Health Promotion.* 2015. 13:66-71 |
| **U. A. Asher, I. Ben-Shlomo, M. Said and H. Nabil.** The effects of exercise induced tachycardia on the maternal electrocardiogram. *British Journal of Obstetrics & Gynaecology.* 1993. 100:41-45 |
| **U. A. Asher, I. Ben-Shlomo, M. Said and H. Nabil.** The effects of exercise induced tachycardia on the maternal electrocardiogram. 1993. 100:41-45 |
| **V. B. Faden, E. Hanna and B. I. Graubard.** The effect of positive and negative health behavior during gestation on pregnancy outcome. *J.Subst.Abuse.* 1997. 9:63-76 |
| **V. B. Faden, E. Hanna and B. I. Graubard.** The effect of positive and negative health behavior during gestation on pregnancy outcome. 1997. 9:63-76 |
| **V. Brotanek and C. Sureau.** Exercise test as a physiological form of antepartum stress test. *International Journal of Gynaecology & Obstetrics.* 1985. 23:327-333 |
| **V. Brotanek and C. Sureau.** Exercise test as a physiological form of antepartum stress test. 1985. 23:327-333 |
| **V. C. B. Nwuga.** Pregnancy and back pain among upper class Nigerian women. 1982. 28:8-11 |
| **V. C. Harizopoulou, A. Kritikos, Z. Papanikolaou, et al.** Maternal physical activity before and during early pregnancy as a risk factor for gestational diabetes mellitus. *Acta Diabetol.* 2010. 47 Suppl 1:83-89 |
| **V. C. Harizopoulou, A. Kritikos, Z. Papanikolaou, et al.** Maternal physical activity before and during early pregnancy as a risk factor for gestational diabetes mellitus. 2010. 47 Suppl 1:83-89 |
| **V. Chaddha, M. J. Simchen, L. K. Hornberger, et al.** Fetal response to maternal exercise in pregnancies with uteroplacental insufficiency. *American Journal of Obstetrics & Gynecology.* 2005. 193:995-999 |
| **V. Escriba-Aguir, S. Perez-Hoyos and M. J. Saurel-Cubizolles.** Physical load and psychological demand at work during pregnancy and preterm birth. 2001. 74:583-588 |
| **V. Escriba-Aguir, S. Perez-Hoyos and M. Saurel-Cubizolles.** Physical load and psychological demand at work during pregnancy and preterm birth. *International Archives of Occupational & Environmental Health.* 2001. 74:583-588 |
| **V. G. Chávez, Sánchez, M. D. P. V. and J. R. Kunhardt Rasch.** Effect of pelvic floor exercise during pregnancy and puerperium on prevention of urinary stress incontinence. 2004. 72:628-636 |
| **V. L. Katz, R. McMurray, C. D. Turnbull, M. Berry, C. Bowman and R. C. Cefalo.** The effects of immersion and exercise on prolactin during pregnancy. *Eur.J.Appl.Physiol.Occup.Physiol.* 1990. 60:191-193 |
| **V. L. Katz, R. McMurray, C. D. Turnbull, M. Berry, C. Bowman and R. C. Cefalo.** The effects of immersion and exercise on prolactin during pregnancy. 1990. 60:191-193 |
| **V. L. Katz, R. McMurray, M. J. Berry and R. C. Cefalo.** Fetal and uterine responses to immersion and exercise. *Obstetrics & Gynecology.* 1988. 72:225-230 |
| **V. L. Katz, R. McMurray, M. J. Berry, R. C. Cefalo and C. Bowman.** Renal responses to immersion and exercise in pregnancy. 1990. 7:118-121 |
| **V. L. Katz, R. McMurray, W. E. Goodwin and R. C. Cefalo.** Nonweightbearing exercise during pregnancy on land and during immersion: a comparative study. *Am.J.Perinatol.* 1990. 7:281-284 |
| **V. Lee.** Exercise and pregnancy. *Melpomene Journal.* 1989. 8:14-16 |
| **V. N. Nguyen-Feng, S. L. Feng, S. Babbar, N. C. Rankins and J. D. Blando.** Hot yoga establishments in local communities serving pregnant women: a pilot study on the health implications of its practice and environmental conditions. 2014. 77:8-12 |
| **V. Pandey, K. Jaremko, R. M. Moore, et al.** The force required to rupture fetal membranes paradoxically increases with acute in vitro repeated stretching. *American Journal of Obstetrics & Gynecology.* 2007. 196:165.e1-165.e7 |
| **V. Seshan and J. K. Muliira.** Effect of a Video-Assisted Teaching Program for Kegel's Exercises on Women's Knowledge About Urinary Incontinence. 2015. 42:531-538 |
| **V. Tomic, G. Sporis, J. Tomic, Z. Milanovic, D. Zigmundovac-Klaic and S. Pantelic.** PMC3760660; The effect of maternal exercise during pregnancy on abnormal fetal growth. *Croat.Med.J.* 2013. 54:362-368 |
| **V. Trampuz.** Physical exertion of the expectant mother and physiopathology of pregnancy with special reference to prematurity of the newborn]. *Minerva Ginecol.* 1967. 19:853-859 |
| **V. Zahn.** Uterine contractions during pregnancy. 1984. 12:107-113 |
| **van der Ploeg, H. P., M. N. van Poppel, T. Chey, A. E. Bauman and W. J. Brown.** The role of pre-pregnancy physical activity and sedentary behaviour in the development of gestational diabetes mellitus. 2011. 14:149-152 |
| **Vrushali Panhale and Neha Mundra.** Relationship between Frequency of Performing Pelvic Floor Muscle Exercises and Stress Incontinence in Antenatal & Postnatal Period. 2012. 6:7-11 5 |
| **W. Agur, P. Steggles, M. Waterfield and R. Freeman.** Does antenatal pelvic floor muscle training affect the outcome of labour? A randomised controlled trial. *Int.Urogynecol.J.Pelvic Floor Dysfunct.* 2008. 19:85-88 |
| **W. Bao, D. K. Tobias, K. Bowers, et al.** NIHMS630394 PMC4209161; Physical activity and sedentary behaviors associated with risk of progression from gestational diabetes mellitus to type 2 diabetes mellitus: a prospective cohort study. *JAMA Internal Medicine.* 2014. 174:1047-1055 |
| **W. E. Spinnewijn, F. K. Lotgering, P. C. Struijk and H. C. Wallenburg.** Fetal heart rate and uterine contractility during maternal exercise at term. *American Journal of Obstetrics & Gynecology.* 1996. 174:43-48 |
[truncated: 161,795 more chars]
